# Supplementary material for: Self-assembled ion-pair organocatalysis – asymmetric Baeyer–Villiger oxidation mediated by flavinium–cinchona alkaloid dimer
Source: Royal Society of Chemistry journal article supplement (doi:10.1039/c6cc00663a), 2016-01-01
Supplement: c6cc00663a1.pdf [file c6cc00663a1.pdf]

## Self-Assembled Ion-Pair Organocatalysis — Asymmetric Baeyer-Villiger Oxidation Mediated by Flavinium–Cinchona Alkaloid Dimer

Pramod Prasad Poudel, Kenji Arimitsu, and Kana Yamamoto\*

*Department of Chemistry and Biochemistry, Department of Chemical and Environmental Engineering, and School of Green Chemistry and Engineering, University of Toledo, 2801 W. Bancroft St., Toledo, OH 43606, United States*

\*Corresponding author. Tel.: +1-419-530-8065.

E-mail address: kana.yamamoto@utoledo.edu

### Supporting Information

#### 1. Experimental Section

- 1-1. Preparation/Characterization of flavinium catalysts
- 1-2. Relative stereochemical assignment of **3a** and **4a**
- 1-3. Preparation/Characterization of cyclobutanones
- 1-4. General procedure of Baeyer-Villiger oxidation
- 1-5. Preparation/Characterization of  $\gamma$ -lactone products

#### 2. Methanol Adduct Formation Study

#### 3. UV-Vis study and Job plot of Flavinium **3a** and quinidine

#### 4. Reaction screening data for Baeyer-Villiger oxidation of 3-phenyl cyclobutanone

#### 5. NMR spectral data

#### 6. HPLC data for $\gamma$ -lactone products

### 1. Experimental Section

#### General

$^1\text{H}$ -NMR/ $^{13}\text{C}$ -NMR spectra were run in  $\text{CDCl}_3$ ,  $d_6$ -DMSO or  $\text{CD}_3\text{CN}$  on either Varian VXR 400 (400 MHz), Varian Unity Inova 600 (600 MHz) or Bruker Avance 600 (600 MHz) NMR spectrometers. Chemical shifts ( $\delta$ ) were reported as parts per million (ppm) with reference to tetramethylsilane (TMS) or solvent unless otherwise stated. The coupling constants ( $J$ ) are reported in Hz. Mass spectra were obtained with Hewlett-Packard Esquire Ion Trap LC-MS (electrospray). High resolution mass spectra were run on a Micromass Q-ToF II. Analytical chiral HPLC was performed with an Agilent HPLC (HP 1100) utilizing chiralcel AD or OD columns (4.6 mm x 25 cm) obtained from Daicel Chemical Industries with detection at 210 nm. GC experiments were performed with Hewlett Packard 5890 series II gas chromatograph equipped with an auto injector HP 7672A and an FID detector, utilizing Restek MXT Biodiesel TG (Siltek – treated stainless steel) capillary column. Optical rotation data were collected using a Rudolph Research Analytical Autopol (APIV/6W), automatic polarimeter. UV-Vis experiments were performed using a Nicolet Evolution 300 UV-Vis spectrophotometer (Thermo Electron Corporation).

#### Materials

Most reagents were purchased from commercial suppliers and used without further purification. Thin layer chromatography (TLC) was carried out on glass backed silica plates, purchased from Sorbent Technology. The plates were visualized under UV (254 nm) light, and occasionally by staining with Ceric ammonium molybdate and gentle heating. During compound separations, column chromatography was carried out using 20–60 micron dry silica purchased from Sorbent Technology. *Tert*-butyl *N*-(3-oxocyclobutyl)carbamate (**10**) was purchased from PharmaBlock. 3-Oxocyclobutanecarboxylic acid was purchased from AK Scientific. Benzyl ester (**8**) was prepared from 3-Oxocyclobutanecarboxylic acid by Fisher esterification. The other cyclobutanones were prepared according to the literature procedures.

## 1-1. Preparation of flavinium catalysts:

Unless otherwise specified, flavinium species used in this study were prepared according to the synthetic scheme illustrated in Scheme S1.

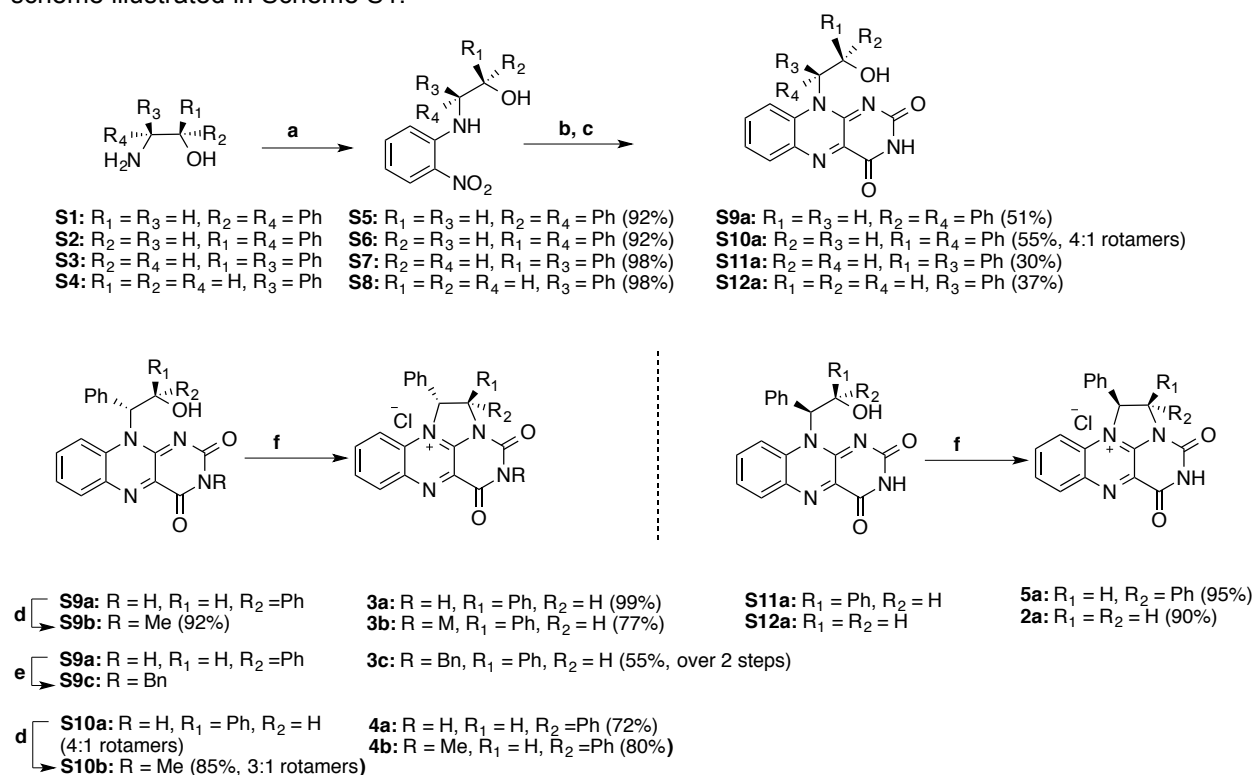

a: 2-nitrofluorobenzene,  $iPr_2NEt$ , DMF; b:  $H_2$ , Pd/C, MeOH; c: alloxan monohydrate,  $B(OH)_3$ , AcOH; d: MeI,  $K_2CO_3$ , DMF; e: BnBr,  $K_2CO_3$ , DMF; f:  $SOCl_2$ ,  $CH_2Cl_2$

Scheme S1. General synthetic scheme for flavinium catalysts.

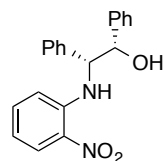

### (1S, 2R)-1,2-Diphenyl-2-[(2-nitrophenyl)amino]ethan-1-ol (S5)

Diisopropylethyl amine (1.55 mL, 9.38 mmol) was added to a mixture of 2-nitrofluorobenzene (1.97 mL, 18.71 mmol) and (1S,2R)-(+)-2-amino-1,2-diphenylethanol (**S1**) (1.00 g, 4.69 mmol) in DMF (20 mL) and then the mixture was stirred at 50 °C for 24 h. The reaction mixture was cooled into room temperature, poured into saturated  $NH_4Cl$  aqueous solution, and extracted with ethyl acetate. The organic layer was washed with water and brine, dried over  $MgSO_4$ , and concentrated under reduced pressure. The residue was purified by silica gel column chromatography ( $CH_2Cl_2$ ) to obtain **7** as an orange amorphous solid (1.45 g, 92%).

$[\alpha] = +639.4^\circ$  ( $c = 0.50$ , MeOH);  $^1H$ -NMR (600 MHz,  $CDCl_3$ )  $\delta$  2.20 (d,  $J = 4.2$  Hz, 1H), 4.83 (t,  $J = 6.0$  Hz, 1H), 5.14 (t,  $J = 4.8$  Hz, 1H), 6.58 (m, 2H), 7.16–7.23 (m, 4H), 7.28–7.31 (m, 7H), 8.13 (d,  $J = 8.4$  Hz, 1H), 8.85 (d,  $J = 6.0$  Hz, 1H);  $^{13}C$ -NMR (150 MHz,  $CDCl_3$ )  $\delta$  63.4, 77.28, 115.1, 115.8, 126.6 (2C), 126.7, 127.8 (2C), 128.1, 128.40 (2C), 128.43, 128.5 (2C), 132.5, 135.9, 137.5, 139.3, 144.2; HRMS (ESI $^+$ )  $m/z$  357.1222 ( $M+Na$ ) $^+$  (calcd for  $C_{20}H_{18}N_2O_3Na$  357.1215).

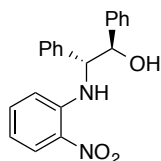

**(1R, 2R)-1,2-Diphenyl-2-[(2-nitrophenyl)amino]ethan-1-ol (S6)**

Diisopropylethyl amine (700  $\mu$ L, 4.23 mmol) was added to a mixture of 2-nitrofluorobenzene (890  $\mu$ L, 8.45 mmol) and (1R,2R)-(+)-2-amino-1,2-diphenylethanol (**S2**) (450.0 mg, 2.11 mmol) in DMF (10 mL). After stirring the reaction mixture at 50  $^{\circ}$ C for 20 h, it was treated in the same manner as the synthesis of **S5**. The residue was purified by silica gel column chromatography ( $\text{CH}_2\text{Cl}_2$ ) to obtain **8** as an orange amorphous solid (647.8 mg, 92%).

$[\alpha]_D^{25} = +325.1^{\circ}$  ( $c = 0.53$ , MeOH);  $^1\text{H-NMR}$  (600 MHz,  $\text{CDCl}_3$ )  $\delta$  2.23 (m, 1H), 4.75 (dd,  $J = 4.2, 6.3$  Hz, 1H), 5.07 (t,  $J = 3.5$  Hz, 1H), 6.49 (d,  $J = 8.8$  Hz, 1H), 6.55 (t,  $J = 7.0$  Hz, 1H), 7.17 (t,  $J = 7.0$  Hz, 1H), 7.27–7.36 (m, 8H), 7.40 (d,  $J = 7.2$  Hz, 2H), 8.13 (dd,  $J = 1.5, 8.7$  Hz, 1H), 9.08 (d,  $J = 6.3$  Hz, 1H);  $^{13}\text{C-NMR}$  (150 MHz,  $\text{CDCl}_3$ )  $\delta$  63.8, 77.6, 115.1, 115.6, 126.2 (2C), 126.7, 127.0 (2C), 128.1, 128.2, 128.5 (2C), 128.9 (2C), 132.6, 135.9, 139.1, 140.2, 144.5; HRMS ( $\text{ESI}^+$ )  $m/z$  357.1210 ( $\text{M}+\text{Na}^+$ ) (calcd for  $\text{C}_{20}\text{H}_{18}\text{N}_2\text{O}_3\text{Na}$  357.1215).

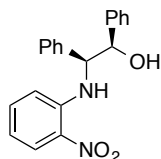

**(1R, 2S)-1,2-Diphenyl-2-[(2-nitrophenyl)amino]ethan-1-ol (S7)**

Diisopropylethyl amine (816  $\mu$ L, 4.68 mmol) was added to a mixture of 2-nitrofluorobenzene (990  $\mu$ L, 9.36 mmol) and (1R,2S)-2-amino-1,2-diphenylethanol (**S3**) (500.0 mg, 2.34 mmol) in DMF (10 mL). After stirring the reaction mixture at 50  $^{\circ}$ C for 22 h, it was treated in the same manner as the synthesis of **S5**. The residue was purified by silica gel column chromatography (0 $\rightarrow$ 100%  $\text{CH}_2\text{Cl}_2$  / Hexanes) to obtain **S7** as an orange amorphous solid (767 mg, 2.29 mmol, 98%).

$^1\text{H-NMR}$  (600 MHz,  $\text{CDCl}_3$ )  $\delta$  2.20 (br d,  $J = 4.1$  Hz, 1H), 4.81 (t,  $J = 5.5$  Hz, 1H), 5.13 (t,  $J = 4.4$  Hz, 1H), 6.57 (m, 2H), 7.16–7.23 (m, 4H), 7.28–7.31 (m, 7H), 8.12 (d,  $J = 8.2$  Hz, 1H), 8.83 (br d,  $J = 5.8$  Hz, 1H);  $^{13}\text{C-NMR}$  (150 MHz,  $\text{CDCl}_3$ )  $\delta$  63.4 (CH), 77.2 (CH), 115.0 (CH), 115.8 (CH), 126.6 (CH, 2C), 127.7 (CH, 2C), 128.1 (CH), 128.38 (CH, 2C), 128.41 (CH), 128.5 (CH, 2C), 132.5 (C), 135.9 (CH), 137.5 (C), 139.2 (C), 144.2 (C); LRMS ( $\text{ESI}^+$ )  $m/z$  357.6 ( $\text{M}+\text{Na}^+$ ) (calcd for  $\text{C}_{20}\text{H}_{18}\text{N}_2\text{O}_3\text{Na}$  357.12). The  $^1\text{H-NMR}$  spectra matched those of **S5**.

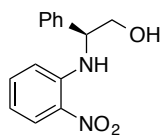

**(2S)-2-Phenyl-2-[(2-nitrophenyl)amino]ethan-1-ol (S8)**

Diisopropylethyl amine (1270  $\mu$ L, 7.28 mmol) was added to a mixture of 2-nitrofluorobenzene (1530  $\mu$ L, 14.56 mmol) and (2S)-2-aminophenylethanol (**S4**) (500.0 mg, 3.64 mmol) in DMF (10 mL). After stirring the reaction mixture at 50  $^{\circ}$ C for 22 h, it was treated in the same manner as the synthesis of **S5**. The residue was purified by silica gel column chromatography (0 $\rightarrow$ 66%  $\text{CH}_2\text{Cl}_2$  / Hexanes) to obtain **S8** as an orange oil still containing ~14.2% DMF (970 mg, ~95 wt%, 3.57 mmol, 98%).

$^1\text{H-NMR}$  (600 MHz,  $\text{CDCl}_3$ )  $\delta$  2.28 (m, 1H), 3.90 (dd,  $J = 5.3, 11.4$  Hz, 1H), 4.01 (dd,  $J = 4.4, 11.4$ , 1H), 4.71 (dt,  $J = 4.4, 5.9$  Hz, 1H), 6.61 (m, 2H), 7.24–7.36 (m, 6H), 8.15 (dd,  $J = 1.5, 3.8$  Hz, 1H), 8.74 (br d,  $J = 5.9$  Hz, 1H);  $^{13}\text{C-NMR}$  (150 MHz,  $\text{CDCl}_3$ )  $\delta$  59.2 (CH), 67.0 ( $\text{CH}_2$ ), 115.1 (CH), 115.9 (CH), 126.5 (CH, 2C), 126.7 (CH), 128.0 (CH), 129.0 (CH, 2C), 132.5 (C), 136.0 (CH), 138.7 (C), 144.6 (C); LRMS ( $\text{ESI}^+$ )  $m/z$  281.5 ( $\text{M}+\text{Na}^+$ ) (calcd for  $\text{C}_{14}\text{H}_{14}\text{N}_2\text{O}_3\text{Na}$  281.09).

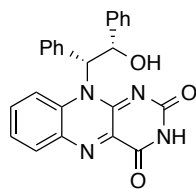

#### 10-[(1R,2S)-1,2-Diphenyl-2-hydroxy]ethyl-benzo[g]pteridin-2,4(3H,10H)-dione (**S9a**)

A catalytic amount of Pd–C (29.7 mg) was added to a solution of **S5** (296.6 mg, 0.89 mmol) in MeOH (10 mL) and the mixture was stirred for 2 h under hydrogen atmosphere. The mixture was filtered through Celite® and the filtrate was concentrated under reduced pressure. Alloxan monohydrate (141.7 mg, 0.89 mmol) and boric acid (57.8 mg, 0.93 mmol) were added to a solution of the crude in acetic acid (10 mL) and then the mixture was stirred at room temperature for 18 h. The reaction mixture was poured into water and extracted with CH<sub>2</sub>Cl<sub>2</sub>. The organic layer was washed with water, dried over Na<sub>2</sub>SO<sub>4</sub>, and concentrated under reduced pressure. MeOH was added to the residue solidified was collected by filtration to obtain **S9a** as a yellow solid (185.3 mg, 51%).

[α]<sub>D</sub><sup>20</sup> = –68.9° (c = 0.10, MeOH); <sup>1</sup>H-NMR (600 MHz, DMSO-*d*<sub>6</sub>) δ 5.91 (br, 1H), 6.44 (br, 1H), 6.97–7.06 (m, 5H), 7.32 (t, *J* = 7.5 Hz, 1H), 7.39 (t, *J* = 7.5 Hz, 2H), 7.49 (br, 1H), 7.59 (m, 2H), 7.68 (d, *J* = 8.2 Hz, 3H), 7.93 (d, *J* = 7.9 Hz, 1H), 11.50 (s, 1H); <sup>13</sup>C-NMR (150 MHz, DMSO-*d*<sub>6</sub>) δ 61.6, 73.3, 118.8, 126.0, 126.6 (2C), 127.3 (2C), 127.5 (2C), 127.8, 128.7, 131.4, 131.8 (2C), 134.0, 134.8 (2C), 136.7, 138.1, 140.4, 151.7, 155.3, 159.3; HRMS (ESI<sup>+</sup>) *m/z* 433.1261 (M+Na)<sup>+</sup> (calcd for C<sub>24</sub>H<sub>18</sub>N<sub>4</sub>O<sub>3</sub>Na 433.1277).

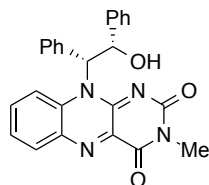

#### 10-[(1R,2S)-1,2-Diphenyl-2-hydroxy]ethyl-3-methyl-benzo[g]pteridin-2,4(3H,10H)-dione (**S9b**)

Potassium carbonate (64.1 mg, 0.46 mmol) and methyl iodide (29 μL, 0.47 mmol) were added to a solution of **S9a** (47.4 mg, 0.12 mmol) in DMF and then the mixture was stirred at room temperature for 11 h. The reaction was poured into saturated NH<sub>4</sub>Cl aqueous solution and extracted with CH<sub>2</sub>Cl<sub>2</sub>. The organic layer was dried over MgSO<sub>4</sub> and concentrated under reduced pressure. The residue was purified by silica gel column chromatography (CH<sub>2</sub>Cl<sub>2</sub>/MeOH = 100/1) and recrystallization from CH<sub>2</sub>Cl<sub>2</sub>–hexanes to obtain **S9b** as a yellow solid (45.1 mg, 92%).

[α]<sub>D</sub><sup>20</sup> = –71.5° (c = 0.42, MeOH); <sup>1</sup>H-NMR (600 MHz, DMSO-*d*<sub>6</sub>) δ 3.28 (s, 3H), 5.94 (br, 1H), 6.45 (br, 1H), 6.96–7.01 (m, 3H), 7.08 (br, 2H), 7.32 (t, *J* = 7.5 Hz, 1H), 7.38 (t, *J* = 7.5 Hz, 2H), 7.51 (br t, *J* = 7.1 Hz, 1H), 7.62 (m, 2H), 7.67 (d, *J* = 8.1 Hz, 3H), 7.99 (d, *J* = 7.9 Hz, 1H); <sup>13</sup>C-NMR (150 MHz, DMSO-*d*<sub>6</sub>) δ 28.1, 61.5, 73.4, 118.9, 126.1, 126.7 (2C), 127.3 (2C), 127.6 (2C), 127.8, 128.7, 131.3, 131.9 (2C), 134.1, 135.1 (2C), 136.6, 137.2, 140.4, 150.2, 154.9, 159.0; HRMS (ESI<sup>+</sup>) *m/z* 447.1421 (M+Na)<sup>+</sup> (calcd for C<sub>25</sub>H<sub>20</sub>N<sub>4</sub>O<sub>3</sub>Na 447.1433).

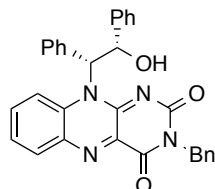

#### 10-[(1R,2S)-1,2-Diphenyl-2-hydroxy]ethyl-3-benzyl-benzo[g]pteridin-2,4(3H,10H)-dione (**S9c**)

Potassium carbonate (94.6 mg, 0.7 mmol) and benzyl bromide (62 μL, 0.52 mmol) were added to a solution of **S9a** (143.6 mg, 0.35 mmol) in DMF (10 mL) and then the mixture was stirred at room temperature for 5 h. The reaction was poured into water and extracted with ethyl acetate. The organic layer was washed with water and brine, dried over MgSO<sub>4</sub>, and concentrated under reduced pressure. The residue was purified by silica gel column chromatography (hexanes/ethyl acetate = 3:1 to 2:1) to obtain **S9c** as a yellow solid (173.2 mg). Due to the difficulty in rigorous purification, the crude material was carried to the cyclization step.



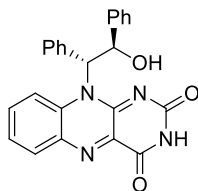

**10-[(1R,2R)-1,2-Diphenyl-2-hydroxy]ethyl-benzo[g]pteridin-2,4(3H,10H)-dione (S10a)**

A catalytic amount of Pd–C (9.3 mg) was added to a solution of **8** (92.8 mg, 0.28 mmol) in MeOH (3 mL) and the mixture was stirred for 1.5 h under hydrogen atmosphere. The mixture was filtered through Celite® and the filtrate was concentrated under reduced pressure. Alloxan monohydrate (44.4 mg, 0.28 mmol) and boric acid (17.2 mg, 0.28 mmol) were added to a solution of the crude in acetic acid (3 mL) and then stirred at room temperature for 18 h. The reaction mixture was poured into water and extracted with CH<sub>2</sub>Cl<sub>2</sub>. The organic layer was washed with water, dried over Na<sub>2</sub>SO<sub>4</sub>, and concentrated under reduced pressure. EtOAc and hexanes were added to the residue and the yellow solid formed was collected by filtration to obtain **S10a** as a yellow solid (63.1 mg, 55%).

<sup>1</sup>H-NMR (600 MHz, DMSO-*d*<sub>6</sub>) δ 5.81 (d, *J* = 4.2 Hz, 0.8H), 6.03 (dd, *J* = 4.2, 8.7 Hz, 0.8H), 6.15 (br, 0.2H), 6.42 (m, 0.2H), 7.16–7.24 (m, 2.4H), 7.26–7.29 (m, 2H), 7.34 (t, *J* = 7.7 Hz, 1.6H), 7.40 (d, *J* = 8.0 Hz, 0.4H), 7.50 (d, *J* = 7.5 Hz, 1.6H), 7.54 (t, *J* = 8.1 Hz, 0.8H), 7.58–7.60 (m, 2H), 7.65–7.69 (m, 1H), 7.91 (d, *J* = 8.8 Hz, 0.8H), 7.94 (m, 0.4H), 7.96 (d, *J* = 8.7 Hz, 0.8H), 8.10 (d, *J* = 8.1 Hz, 0.8H), 8.14 (d, *J* = 7.9 Hz, 0.2H), 8.38 (d, *J* = 8.8 Hz, 0.2H), 11.53 (s, 0.8H), 11.55 (s, 0.2H)

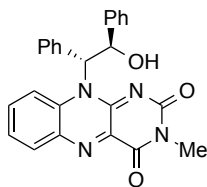

**10-[(1R,2R)-1,2-diphenyl-2-hydroxy]ethyl-3-methyl-benzo[g]pteridin-2,4(3H,10H)-dione (S10b)**

Potassium carbonate (45.6 mg, 0.33 mmol) and methyl iodide (21 μL, 0.34 mmol) were added to a solution of **S10a** (33.8 mg, 0.082 mmol) in DMF and then the mixture was stirred at room temperature for 21 h. The reaction was poured into saturated NH<sub>4</sub>Cl aqueous solution and extracted with CH<sub>2</sub>Cl<sub>2</sub>. The organic layer was dried over MgSO<sub>4</sub> and concentrated under reduced pressure. The residue was purified by silica gel column chromatography (CH<sub>2</sub>Cl<sub>2</sub>/MeOH = 100/1) to obtain **S10b** as a yellow solid (29.9 mg, 85%).

<sup>1</sup>H-NMR (600 MHz, DMSO-*d*<sub>6</sub>) δ 3.29 (s, 0.75H), 3.32 (s, 2.25H), 5.82 (d, *J* = 4.2 Hz, 0.75H), 6.05 (dd, *J* = 4.2, 8.8 Hz, 0.75H), 6.39 (d, *J* = 8.6 Hz, 0.25H), 6.48 (br t, *J* = 8.3 Hz, 0.25H), 7.18–7.20 (m, 2.5H), 7.23 (t, *J* = 6.6 Hz, 0.5H), 7.27 (t, *J* = 7.6 Hz, 1.5H), 7.36 (t, *J* = 7.6 Hz, 1.5H), 7.42 (d, *J* = 7.3 Hz, 0.5H), 7.50 (d, *J* = 7.6 Hz, 1.5H), 7.57 (t, *J* = 7.3 Hz, 0.75H), 7.60 (m, 0.5H), 7.63 (d, *J* = 7.9 Hz, 1.5H), 7.69 (m, 0.5H), 7.71 (t, *J* = 7.3 Hz, 0.75H), 7.95 (d, *J* = 8.6 Hz, 0.75H), 7.97 (m, 0.25H), 7.98 (d, *J* = 8.8 Hz, 0.75H), 8.16 (d, *J* = 8.1 Hz, 0.75H), 8.20 (d, *J* = 8.3 Hz, 0.25H), 8.46 (d, *J* = 8.8 Hz, 0.25H)

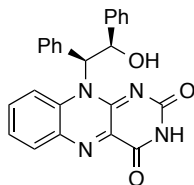

**10-[(1S,2R)-1,2-Diphenyl-2-hydroxy]ethyl-benzo[g]pteridin-2,4(3H,10H)-dione (S11a)**

A catalytic amount of Pd–C (47 mg) was added to a solution of **S7** (736 mg, 2.20 mmol) in MeOH (22 mL) and the mixture was stirred for 20 h under hydrogen atmosphere. The mixture was filtered through Celite® and the filtrate was concentrated under reduced pressure. Alloxan monohydrate (352 mg, 2.20 mmol) and boric acid (144 mg, 2.31 mmol) were added to a solution of the crude in acetic acid (22 mL) and then the mixture was stirred at 50 °C for 24.5 h. The reaction mixture was poured into water and extracted with CH<sub>2</sub>Cl<sub>2</sub>. The organic layer was washed with water, dried over MgSO<sub>4</sub>, and concentrated under reduced

pressure. After stripping off twice with MeOH, anhydrous MeOH (2 mL) was added to the residue, and the solid was isolated by filtration to obtain **S11a** as a yellow solid (269 mg, 30%). The  $^1\text{H-NMR}$  spectra matched those of compound **S9a**. HRMS (ESI $^+$ )  $m/z$  433.1276 (M+Na) $^+$  (calcd for  $\text{C}_{24}\text{H}_{18}\text{N}_4\text{O}_3\text{Na}$  433.1277).

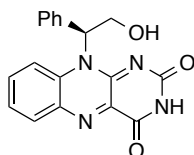

#### 10-[(1S)-1-Phenyl-2-hydroxy]ethyl-benzo[g]pteridin-2,4(3H,10H)-dione (**S12a**)

A catalytic amount of Pd-C (115 mg) was added to a solution of **S8** (1157 mg, 4.48 mmol) in MeOH (10 mL) and the mixture was stirred for 4 h under hydrogen atmosphere. The mixture was filtered through Celite $^{\text{®}}$  and the filtrate was concentrated under reduced pressure. Alloxan monohydrate (717 mg, 4.48 mmol) and boric acid (282 mg, 4.52 mmol) were added to a solution of the crude in acetic acid (10 mL) and then the mixture was stirred at room temperature for 26 h. The reaction mixture was poured into water (200 mL) and extracted with  $\text{CH}_2\text{Cl}_2$  (150 mL x 4). The organic layer was washed with water (50 mL x 2), dried over  $\text{MgSO}_4$ , and concentrated under reduced pressure. The crude mass thus obtained was washed with  $\text{CH}_2\text{Cl}_2$  (50 mL) and dried at room temperature to give **S12a** as a yellow solid (700 mg, 37%) which contained 20% (weight) of  $\text{CH}_2\text{Cl}_2$  as indicated by  $^1\text{H-NMR}$ .

$[\alpha]_D^{25} = 288.7^\circ$  ( $c = 0.5$ , MeOH);  $^1\text{H-NMR}$  (600 MHz,  $\text{DMSO-}d_6$ ):  $\delta$  4.33 (br, s, 1H), 4.64 (br, s, 1H), 5.35 (br, s, 1H), 7.28–7.42 (m, 7H), 7.52 (br, s, 1H), 7.58 (br, s, 1H), 8.12 (d,  $J = 8.0$  Hz, 1H), 11.52 (s, 1H);  $^{13}\text{C-NMR}$  (150 MHz,  $\text{DMSO-}d_6$ )  $\delta$  59.09, 60.08, 118.19, 125.72, 126.27, 127.48, 128.82, 131.40, 132.11, 133.62, 135.45, 136.60, 139.04, 152.52, 155.67, 159.82; HRMS (ESI $^+$ )  $m/z$  357.0960 (M+Na) $^+$  (calcd for  $\text{C}_{18}\text{H}_{14}\text{N}_4\text{O}_3\text{Na}$  357.0964)

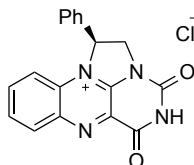

#### (1S)-1-Phenyl-1,2-dihydro-4,6(3H,5H)-dioxo-benzo[g]imidazo[1,2,3-i]pteridin-12-ium chloride (**2a**)

Thionyl chloride (0.5 mL) was added to a suspension of **S12a** (200 mg of 80% pure sample, 20% being  $\text{CH}_2\text{Cl}_2$ , 0.48 mmol) in  $\text{CH}_2\text{Cl}_2$  (5 mL) at  $0^\circ\text{C}$  and then the mixture was stirred at room temperature for 2 h. Hexanes (2 mL) was added to the reaction mixture and the precipitate formed was collected by filtration. The crude mass was washed with hexanes and small amount of  $\text{CH}_2\text{Cl}_2$  to obtain **2a** as a yellow solid (160 mg, 90.2%) which contained 5% (weight) of  $\text{CH}_2\text{Cl}_2$  as indicated by  $^1\text{H-NMR}$ .

$[\alpha]_D^{25} = -173.6^\circ$  ( $c = 0.5$ , MeOH);  $^1\text{H-NMR}$  (600 MHz,  $\text{DMSO-}d_6$ )  $\delta$  4.48 (dd,  $J = 6.3, 11.2$  Hz, 1H), 5.12 (dd,  $J = 11.2, 10.9$  Hz, 1H), 7.18 (dd,  $J = 6.3, 10.9$  Hz, 1H), 7.48–7.51 (m, 3H), 7.68 (d,  $J = 8.5$  Hz, 1H), 7.73–7.75 (m, 2H), 8.02 (m, 1H), 8.15 (m, 1H), 8.58 (d,  $J = 8.3$  Hz, 1H), 13.02 (s, 1H);  $^{13}\text{C-NMR}$  (150 MHz,  $\text{DMSO-}d_6$ )  $\delta$  53.29, 66.58, 117.24, 127.47, 127.88, 129.60, 130.27, 130.89, 132.89, 135.52, 135.63, 137.98, 139.39, 144.32, 146.30, 158.05; HRMS (ESI $^+$ )  $m/z$  317.1031 (M-Cl) $^+$  (calcd for  $\text{C}_{18}\text{H}_{13}\text{N}_4\text{O}_2$  317.1039)

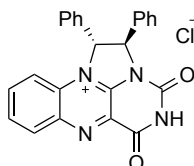

#### (1R,2R)-1,2-Diphenyl-1,2-dihydro-4,6(3H,5H)-dioxo-benzo[g]imidazo[1,2,3-i]pteridin-12-ium chloride (**3a**)

Thionyl chloride (1 mL) was added to a suspension of **S9a** in  $\text{CH}_2\text{Cl}_2$  (5 mL) at  $0^\circ\text{C}$  and then the mixture was stirred at room temperature for 3h. Hexanes (10 mL) was added to the reaction mixture and the precipitate formed was collected by filtration to obtain **3a** as a yellow solid (148.3 mg, 99%).

$[\alpha] = +226.0^\circ$  ( $c = 0.05$ , MeOH);  $^1\text{H-NMR}$  (600 MHz, DMSO- $d_6$ )  $\delta$  5.88 (d,  $J = 7.9$  Hz, 1H), 7.00 (d,  $J = 7.9$  Hz, 1H), 7.46–7.54 (m, 7H), 7.66 (m, 2H), 7.74 (m, 2H), 8.01 (t,  $J = 7.5$  Hz, 1H), 8.08 (t,  $J = 7.5$  Hz, 1H), 8.59 (d,  $J = 8.2$  Hz, 1H), 12.95 (s, 1H);  $^{13}\text{C-NMR}$  (150 MHz, DMSO- $d_6$ )  $\delta$  70.4, 74.8, 117.5, 127.7 (2C), 128.2 (2C), 129.1 (2C), 129.5, 129.8 (2C), 130.5, 130.7, 132.7, 134.8, 135.2, 135.9, 137.2, 139.7, 144.3, 145.8, 158.2; HRMS (ESI $^+$ )  $m/z$  393.1344 (M-Cl) $^+$  (calcd for C<sub>24</sub>H<sub>17</sub>N<sub>4</sub>O<sub>2</sub> 393.1352)

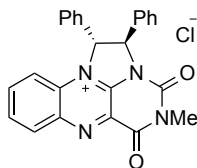

**(1R,2R)-1,2-Diphenyl-3-methyl-1,2-dihydro-4,6(3H,5H)-dioxo-benzo[g]imidazo[1,2,3-i,j]pteridin-12-ium chloride (3b)**

Thionyl chloride (1 mL) was added to a suspension of **S9b** (81.2 mg, 0.19 mmol) in CH<sub>2</sub>Cl<sub>2</sub> (5 mL) at 0 °C and then the mixture was stirred at room temperature for 3h. Hexanes (10 mL) was added to the reaction mixture and the precipitate formed was collected by filtration to obtain **3b** as yellow solid (65.1 mg, 77%).

$[\alpha] = +166.2^\circ$  ( $c = 0.20$ , MeOH);  $^1\text{H-NMR}$  (600 MHz, DMSO- $d_6$ )  $\delta$  3.40 (s, 3H), 5.97 (d,  $J = 7.7$  Hz, 1H), 7.05 (d,  $J = 7.7$  Hz, 1H), 7.49–7.52 (m, 7H), 7.67 (m, 3H), 7.71 (d,  $J = 6.4$  Hz, 1H), 8.04 (t,  $J = 7.7$  Hz, 1H), 8.12 (t,  $J = 7.7$  Hz, 1H), 8.65 (d,  $J = 8.4$  Hz, 1H);  $^{13}\text{C-NMR}$  (150 MHz, DMSO- $d_6$ )  $\delta$  28.8, 71.0, 74.6, 117.5, 127.5, 127.9 (2C), 128.2 (2C), 129.1 (2C), 129.6, 129.8 (2C), 130.6, 130.9, 132.9, 134.7 (2C), 135.1, 137.7, 140.1, 142.8, 146.3, 157.7; HRMS (ESI $^+$ )  $m/z$  407.1515 (M-Cl) $^+$  (calcd for C<sub>25</sub>H<sub>19</sub>N<sub>4</sub>O<sub>2</sub> 407.1508)

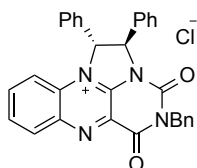

**(1R,2R)-1,2-Diphenyl-3-benzyl-1,2-dihydro-4,6(3H,5H)-dioxo-benzo[g]imidazo[1,2,3-i,j]pteridin-12-ium chloride (3c)**

Thionyl chloride (1 mL) was added to a suspension of **S9c** (173.2 mg of dried mass from previous step without purification) in CH<sub>2</sub>Cl<sub>2</sub> (5 mL) at 0 °C and then the mixture was stirred at room temperature for 3.5h. Hexanes (10 mL) was added to the reaction mixture and the precipitate formed was collected by filtration to obtain **3c** as yellow solid (100.4 mg, 55.3% over two steps).

$[\alpha] = +98.2^\circ$  ( $c = 0.5$ , MeOH);  $^1\text{H-NMR}$  (600 MHz, CDCl<sub>3</sub>)  $\delta$  5.00 (d,  $J = 14.4$  Hz, 1H), 5.14 (d,  $J = 14.4$  Hz, 1H), 5.87 (broad s, 1H), 6.43 (broad s, 1H), 7.15 (broad m, 4H), 7.39–7.50 (m, 8H), 7.62–7.71 (m, 6H), 8.31 (broad s, 1H);  $^{13}\text{C-NMR}$  (150 MHz, CDCl<sub>3</sub>)  $\delta$  45.94, 73.16, 117.08, 127.75, 128.24, 128.46, 128.54, 128.73, 128.87, 129.41, 129.49, 130.05, 130.45, 131.00, 132.50, 132.86, 133.81, 133.96, 135.34, 137.29, 141.18, 143.65, 146.43, 157.41; HRMS (ESI $^+$ )  $m/z$  483.1819 (M-Cl) $^+$  (calcd for C<sub>31</sub>H<sub>23</sub>N<sub>4</sub>O<sub>2</sub> 483.1821)

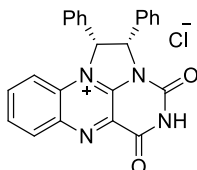

**(1R,2S)-1,2-Diphenyl-1,2-dihydro-4,6(3H,5H)-dioxo-benzo[g]imidazo[1,2,3-i,j]pteridin-12-ium chloride (4a)**

Thionyl chloride (200  $\mu\text{L}$ ) was added to a suspension of **S10a** (42.0 mg, 0.10 mmol) in CH<sub>2</sub>Cl<sub>2</sub> (1 mL) at 0 °C and then stirred at room temperature for 3h. Hexanes (2 mL) was added to the reaction mixture and the precipitate formed was collected by filtration to obtain **4a** as a yellow solid (31.7 mg, 72%).

$[\alpha] = +206.2^\circ$  ( $c = 0.15$ , MeOH);  $^1\text{H-NMR}$  (600 MHz, DMSO- $d_6$ )  $\delta$  6.61 (d,  $J = 11.2$  Hz, 1H), 7.00 (br, 1H), 7.07–7.14 (m, 4H), 7.22 (br, 1H), 7.36 (d,  $J = 7.4$  Hz, 2H), 7.42–7.46 (m, 2H), 7.53 (d,  $J = 11.2$  Hz, 1H), 8.04 (t,  $J = 7.5$  Hz, 1H), 8.10 (t,  $J = 7.5$  Hz, 1H), 8.62 (d,  $J = 8.1$  Hz, 1H), 12.94 (s, 1H);  $^{13}\text{C-NMR}$  (150 MHz, DMSO- $d_6$ )  $\delta$  66.1, 70.4, 117.7, 127.3, 127.4, 127.7 (2C), 128.2 (2C), 128.3, 128.5, 129.3 (2C),

129.5, 130.8, 131.3, 132.1, 132.8, 136.1, 137.6, 139.4, 145.6, 146.2, 158.1; HRMS (ESI<sup>+</sup>) *m/z* 393.1360 (M–Cl)<sup>+</sup> (calcd for C<sub>24</sub>H<sub>17</sub>N<sub>4</sub>O<sub>2</sub> 393.1352)

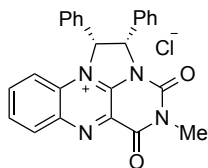

**(1*R*,2*S*)-1,2-Diphenyl-3-methyl-1,2-dihydro-4,6(3*H*,5*H*)-dioxo-benzo[*g*]imidazo[1,2,3-*i,j*]pteridin-12-ium chloride(4b)**

Thionyl chloride (600  $\mu$ L) was added to a suspension of **S10b** (49.1 mg, 0.12 mmol) in CH<sub>2</sub>Cl<sub>2</sub> (3 mL) at 0 °C and then stirred at room temperature for 3h. Hexanes (6 mL) was added to the reaction mixture and the precipitate formed was collected by filtration to obtain **4b** as a yellow solid (40.7 mg, 80%).

[ $\alpha$ ] = +231.5° (*c* = 0.20, MeOH); <sup>1</sup>H-NMR (600 MHz, DMSO-*d*<sub>6</sub>)  $\delta$  3.43 (s, 3H), 6.67 (d, *J* = 11.2 Hz, 1H), 6.91 (br, 1H), 7.02 (br, 1H), 7.09 (m, 2H), 7.14 (t, *J* = 7.5 Hz, 2H), 7.23 (m, 1H), 7.33 (br, 2H), 7.39 (m, 1H), 7.50 (d, *J* = 8.4 Hz, 1H), 7.53 (d, *J* = 11.2 Hz, 1H), 8.08 (t, *J* = 7.3 Hz, 1H), 8.15 (t, *J* = 7.3 Hz, 1H), 8.69 (d, *J* = 8.2 Hz, 1H); <sup>13</sup>C-NMR (150 MHz, DMSO-*d*<sub>6</sub>)  $\delta$  28.9, 66.8, 70.3, 117.8, 127.2, 127.4, 127.8 (2C), 128.3 (2C), 128.6, 129.4 (2C), 129.5, 131.1 (2C), 131.9, 132.9 (2C), 134.8, 138.1, 139.8, 144.1, 146.6, 157.6; HRMS (ESI<sup>+</sup>) *m/z* 407.1490 (M–Cl)<sup>+</sup> (calcd for C<sub>25</sub>H<sub>19</sub>N<sub>4</sub>O<sub>2</sub> 407.1508).

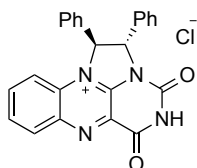

**(1*S*,2*S*)-1,2-Diphenyl-1,2-dihydro-4,6(3*H*,5*H*)-dioxo-benzo[*g*]imidazo[1,2,3-*i,j*]pteridin-12-ium chloride (5a)**

The procedure to make **3a** from **S9a** was followed to make **5a** from thionyl chloride treatment of **S11a**. It was obtained as yellow solid (95%).

[ $\alpha$ ] = –243.0° (*c* = 0.05, MeOH); <sup>1</sup>H-NMR (600 MHz, DMSO-*d*<sub>6</sub>)  $\delta$  5.90 (d, *J* = 7.7 Hz, 1H), 7.01 (d, *J* = 7.7, 1H), 7.47–7.52 (m, 7H), 7.65 (m, 2H), 7.70 (m, 2H), 8.02 (m, 1H), 8.09 (m, 1H), 8.60 (d, *J* = 8.3), 12.97 (s, 1H); <sup>13</sup>C-NMR (150 MHz, DMSO-*d*<sub>6</sub>)  $\delta$  70.30, 74.77, 117.48, 127.31, 127.67, 128.09, 129.09, 129.58, 129.83, 130.51, 130.81, 132.76, 134.79, 135.28, 135.80, 137.44, 139.76, 144.18, 145.79, 158.19; HRMS (ESI<sup>+</sup>) *m/z* 393.1347 (M–Cl)<sup>+</sup> (calcd for C<sub>24</sub>H<sub>17</sub>N<sub>4</sub>O<sub>2</sub> 393.1352)

## 1-2. Relative stereochemical assignment of **3a** and **4a**

A note on relative configuration of **3a** and **4a**: The cyclization to form the flavinium salt was furnished by thionyl chloride activation of the hydroxyl group at the stereogenic center, which should undergo by S<sub>N</sub>i mechanism under the reaction conditions. However, we suspected that it may not be a case due to the sterics of the system. Therefore, NOESY spectra (see section 5) of flavinium **3a** and **4a** were obtained in order to confirm the relative configuration of the two phenyl groups.

The spectral data of **3a** showed that each proton on the ethylene bridge recorded correlations to each other as well as with the four protons at the *ortho*-position of both phenyl rings (Figure S1). On the other hand, those of **4a** only showed the correlations between one of the two phenyl rings in addition to the correlations to each other. The difference can be explained by the restriction of free rotation of the phenyl rings: that of **3a** should be relatively facile while that of **4a** can be restricted. With this assumption, the stereochemistry of these compounds was assigned as shown in Figure S1. The stereochemical assignment confirmed that the mode of thionyl chloride cyclization was S<sub>N</sub>2 rather than the S<sub>N</sub>i mechanism.

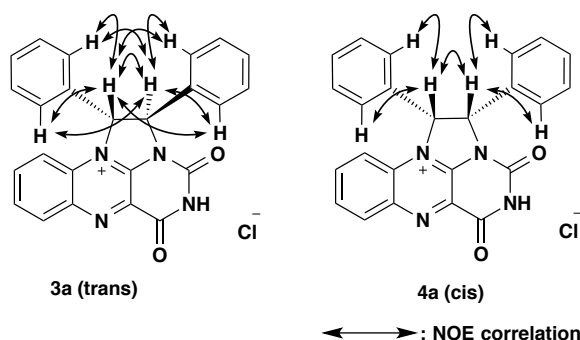

**Figure S1.** The correlations recorded in the 2D-NOESY experiments.

### 1-3. Preparation/Characterization of cyclobutanones:

Unless otherwise specified in the materials section, cyclobutanones were prepared according to the literature procedure.<sup>1</sup>

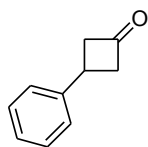

#### **3-phenylcyclobutanone (10)**<sup>1,2</sup>

Yield: 51%. <sup>1</sup>H-NMR (600 MHz, CDCl<sub>3</sub>)  $\delta$  3.26 (ddt,  $J$  = 3.2, 8.2, 19.9 Hz, 2H), 3.50 (ddt,  $J$  = 3.7, 8.2, 19.9 Hz, 2H), 3.69 (pent,  $J$  = 8.0, 1H), 7.26 (t,  $J$  = 7.3 Hz, 1H), 7.30 (t,  $J$  = 7.6 Hz, 2H), 7.37 (t,  $J$  = 7.5 Hz, 2H).

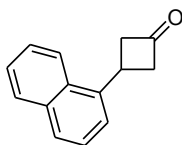

#### **3-(1-Naphthyl)cyclobutanone (11)**<sup>3</sup>

Yield: 20%. <sup>1</sup>H-NMR (600 MHz, CDCl<sub>3</sub>)  $\delta$  3.38–3.43 (m, 2H), 3.61–3.66 (m, 2H), 4.29 (pent,  $J$  = 8.4 Hz, 1H), 7.44–7.50 (m, 2H), 7.52–7.58 (m, 2H), 7.79 (d,  $J$  = 8.4 Hz, 1H), 7.91 (d,  $J$  = 8.4 Hz, 1H), 7.95 (d,  $J$  = 8.4 Hz); <sup>13</sup>C-NMR (150 MHz, CDCl<sub>3</sub>)  $\delta$  26.03, 52.99, 122.27, 123.71, 125.29, 125.89, 126.26, 127.59, 139.01, 131.64, 133.98, 138.12, 206.55; HRMS (ESI<sup>+</sup>)  $m/z$  219.0780 (M+Na)<sup>+</sup> (calcd for C<sub>14</sub>H<sub>12</sub>ONa 219.0786).

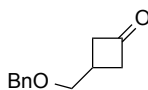

#### **3-(Benzyloxymethyl)cyclobutanone (12)**<sup>1,4</sup>

Yield: 50.7%. <sup>1</sup>H-NMR (600 MHz, CDCl<sub>3</sub>)  $\delta$  2.66–2.69 (m, 1H), 2.85–2.89 (m, 2H), 3.10–3.15 (m, 2H), 3.59 (d, 2H,  $J$  = 6.2), 4.55 (s, 2H), 7.25–7.36 (m, 5H); <sup>13</sup>C-NMR (150 MHz, CDCl<sub>3</sub>)  $\delta$  23.65 (CH), 50.03 (CH<sub>2</sub>), 72.87 (CH<sub>2</sub>), 73.19 (CH<sub>2</sub>), 127.65 (CH), 127.76 (C), 128.45 (CH), 138.01 (C), 207.55 (C).

<sup>1</sup> Trost, B. M.; Xie, J. *J. Am. Chem. Soc.* **2008**, *130*, 6231–6242.

<sup>2</sup> Petersen, K. S.; Stoltz, B. M. *Tetrahedron*, **2011**, *67*, 4352–4357.

<sup>3</sup> Chai, Z.; Rainey, T. J. *J. Am. Chem. Soc.* **2012**, *134*, 3615–3618.

<sup>4</sup> Rammeloo, T.; Stevens, C. *Chem. Commun.* **2002**, *3*, 250.

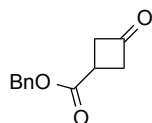

### Benzyl-3-oxocyclobutanoate (13)<sup>5</sup>

Cyclobutanone **9** was prepared by trans-esterification of the corresponding carboxylic acid. Yield: 46.1%. <sup>1</sup>H-NMR (600 MHz, CDCl<sub>3</sub>) δ 3.25–3.33 (m, 3H), 3.40–3.48 (m, 2H), 5.19 (s, 2H), 7.34–7.40 (m, 5H); <sup>13</sup>C-NMR (150 MHz, CDCl<sub>3</sub>) δ 17.54, 51.79, 67.26, 128.48, 128.68, 128.83, 135.54, 173.99, 203.76.

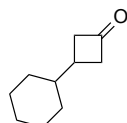

### 3-cyclohexylcyclobutan-1-one (15)<sup>6</sup>

Yield: 22.3%. <sup>1</sup>H-NMR (600 MHz, CDCl<sub>3</sub>) δ 0.90–0.96 (m, 2H), 1.14–1.28 (m, 4H), 1.67–1.70 (m, 1H), 1.74–1.79 (m, 4H), 2.01–2.09 (m, 1H), 2.73–2.77 (m, 2H), 3.02–3.06 (m, 2H); <sup>13</sup>C-NMR (150 MHz, CDCl<sub>3</sub>) δ 26.01, 26.18, 29.95, 30.89, 43.74, 50.80, 208.59.

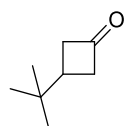

### 3-tert-butylcyclobutan-1-one<sup>1,2</sup>

Yield: 7.7%. Low yield is associated with volatility of the product. Presence of some impurities (solvents and other) were indicated by <sup>1</sup>H NMR which were not removed completely as there was a decrease in compound quantity while drying the sample under reduced pressure. NMR (<sup>1</sup>H & <sup>13</sup>C) data matched with the literature reported values. <sup>1</sup>H-NMR (600 MHz, CDCl<sub>3</sub>) δ 2.27–2.33 (m, 1H), 2.82–2.89 (m, 4H); <sup>13</sup>C-NMR (150 MHz, CDCl<sub>3</sub>) δ 26.41, 31.46, 34.72, 47.72, 208.32.

## 1-4. General procedure of Baeyer-Villiger oxidation

A mixture of a substrate (0.1 mmol) and a flavinium catalyst (10 mol%) in solvent (1 mL) was cooled to the indicated temperature. Cinchona alkaloid or other base (20 mol%) was added to the reaction mixture and the reaction was initiated by adding 30% H<sub>2</sub>O<sub>2</sub> (0.15 mmol). After being stirred for the designated time, the reaction was quenched by addition of 1N sodium thiosulfate aqueous solution, and the mixture was extracted with methylene chloride. The organic layer was dried over MgSO<sub>4</sub> and concentrated under reduced pressure. The residue was purified by silica gel column chromatography (hexanes/EtOAc = 9:1 to 8:2) or by preparatory TLC (SiO<sub>2</sub>, hexanes/EtOAc = 8:2 or 7:3) to obtain γ-butyrolactone. Reaction conversion was monitored by GC analyses with the following method: Oven temperature: 60 °C→370 °C (10 °C/min; 6 min hold at 370 °C; total time 37 min). Injector temp: 250 °C; Detector temp: 370 °C. Injection vol: 1 μL; Split mode: 40:3. Dry N<sub>2</sub> was used as a carrier gas with a column flow rate of 15 mL/min.

<sup>5</sup> Du, X.; Hinklin, R. J.; Xiong, Y.; Dransfield, P.; Park, P.; Kohn, T. J.; Pattaropong, V.; Lai, S.; Fu, Z.; Jiao, X.; Chow, D.; Jin, L.; Davda, J.; Veniant, M. M.; Anderson, D. A.; Baer, B. R.; Bencsik, J. R.; Boyd, S. A.; Chicarelli, M. J.; Mohr, P. J.; Wang, B.; Condroski, K. R.; DeWolf, W. E.; Conn, M.; Tran, T.; Yang, J.; Aicher, T. D.; Medina, J. C.; Coward, P.; Houze, J. B., *ACS Med. Chem. Lett.* **2014**, 5, 1284–1289.

<sup>6</sup> Malkov, A. V.; Friscourt, F.; Bell, M.; Swarbrick, M. E.; Koc̆ovský, P. *J. Org. Chem.* **2008**, 73, 3996–4003.

### 1-5. Characterization of $\gamma$ -lactone products

Stereoselectivity was determined by chiral HPLC analysis using the following method: [Daicel CHIRALCEL AD (0.46 x 25 cm); *n*-hexanes/2-propanol = 98/2, flow rate = 1.25 mL/min; Injection vol = 5  $\mu$ L; detection wavelength 210 nm] for all compounds except for  $\gamma$ -lactones of 3-cyclohexylcyclobutanone and 3-*t*-butylcyclobutanone which were reacted with benzyl amine /  $\text{Me}_3\text{Al}$  and the corresponding  $\gamma$ -hydroxy-*N*-benzylamide derivatives<sup>9</sup> were analyzed by Daicel CHIRALCEL OD (0.46 x 25 cm); *n*-hexanes/2-propanol = 90/10, flow rate = 0.75 mL/min; Injection vol = 5  $\mu$ L; detection wavelength 210 nm]. The absolute configuration of  $\gamma$ -lactone product of 3-phenylcyclobutanone (**10**) was determined by the reported retention time.<sup>6</sup> The configuration of the other  $\gamma$ -lactone products was presumed to be identical based on their structural similarity, unless otherwise noted. The structures of the major isomer are shown.

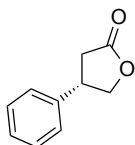

#### (S)-4-phenyldihydrofuran-2(3H)-one<sup>2, 7</sup>

A mixture of 3-phenylcyclobutanone **10** (300 mg, 2.05 mmol) and flavinium catalyst **3a** (10 mol%) in  $\text{CHCl}_3$  (20 mL) was cooled to about  $-15^\circ\text{C}$ .  $(\text{DHQ})_2\text{PHAL}$  (10 mol%) was added to the reaction mixture and the reaction was initiated by adding 1.1 equivalent of 3%  $\text{H}_2\text{O}_2$  in  $\text{CH}_3\text{CN}$  (9): water(1). The reaction was stirred at  $-15^\circ\text{C}$  for 64h and then quenched by 1N sodium thiosulfate aqueous solution (1 mL). Water (5 mL) was added to the mixture and organic layer was separated. The organic layer was dried over  $\text{MgSO}_4$  and concentrated under reduced pressure. The residue was purified by silica gel column chromatography (hexanes/ $\text{EtOAc}$  = 9:1) to obtain 4-phenyldihydrofuran-2(3H)-one.

Yield: 87 %, e.r.: 91.7:8.3.  $t_R$  = 34.9 (major), 42.1 (minor) min.  $^1\text{H-NMR}$  (400 MHz,  $\text{CDCl}_3$ )  $\delta$  2.69 (dd,  $J$  = 9.2, 17.2 Hz, 1H), 2.94 (dd,  $J$  = 9.0, 17.2 Hz, 1H), 3.80 (m, 1H), 4.28 (dd,  $J$  = 8.2, 9.0 Hz, 1H), 4.68 (dd,  $J$  = 8.0, 8.8 Hz, 1H), 7.23–7.40 (m, 5H).

#### Recrystallization of 4-phenyldihydrofuran-2(3H)-one<sup>2</sup>

200 mg of the lactone described above (e.r.: 91.7:8.3) was dissolved in a warm mixture of  $\text{Et}_2\text{O}$  (61mL) and hexanes (25 mL) and the resultant solution was kept in a refrigerator for 4 hrs. The white crystals was filtered and washed with cold hexanes (1 mL x 3) to give 120 mg of the enantioenriched lactone (60%, e.r.: 98.5:1.5). HPLC spectrum of the recrystallized sample is given below.

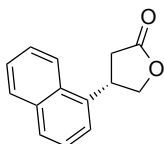

#### (S)-4-(naphthalen-1-yl)dihydrofuran-2(3H)-one

Yield: 92 %, e.r.: 96.9:3.1.  $t_R$  = 44.4 (major), 54.1 (minor).  $^1\text{H-NMR}$  (600 MHz,  $\text{CDCl}_3$ )  $\delta$  2.87 (dd,  $J$  = 7.3, 17.4 Hz, 1H), 3.09 (dd,  $J$  = 8.5, 17.4 Hz, 1H), 4.47 (dd,  $J$  = 6.3, 9.1 Hz, 1H), 4.58 (m, 1H), 4.85 (dd,  $J$  = 7.3, 9.1 Hz, 1H), 7.44 (d,  $J$  = 7.1 Hz, 1H), 7.49 (m, 1H), 7.55 (m, 1H), 7.59 (m, 1H), 7.83 (d,  $J$  = 8.2 Hz, 1H), 7.92 (m, 1H), 7.97 (d,  $J$  = 8.5 Hz, 1H);  $^{13}\text{C-NMR}$  (600 MHz,  $\text{CDCl}_3$ )  $\delta$  35.34, 36.94, 73.55, 122.59, 122.67, 125.76, 126.97, 128.56, 129.53, 131.39, 134.29, 135.30, 176.61; HRMS ( $\text{ESI}^+$ )  $m/z$  235.0739 ( $\text{M}+\text{Na}$ )<sup>+</sup> (calcd for  $\text{C}_{14}\text{H}_{12}\text{O}_2\text{Na}$  235.0735).

<sup>7</sup> Xu, Q-L.; Dai, L-X.; You, S-L. *Adv. Synth. Catal.* **2012**, 354, 2275–2282.

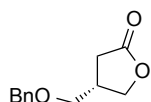

**(S)-4-((benzyloxy)methyl)dihydrofuran-2(3H)-one**

Yield: 85 %, e.r.: 82.0:18.0.  $t_R$  = 37.6 (major), 42.9 (minor) min.  $^1\text{H-NMR}$  (600 MHz,  $\text{CDCl}_3$ )  $\delta$  2.37 (dd,  $J$  = 6.2, 17.7 Hz, 1H), 2.60 (dd,  $J$  = 9.0, 17.7 Hz, 1H), 2.79–2.84 (m, 1H), 3.44–3.50 (m, 2H), 4.18 (dd,  $J$  = 5.5, 9.2 Hz, 1H), 4.39 (dd,  $J$  = 7.5, 9.2 Hz, 1H), 4.52 (s, 2H), 7.29–7.37 (m, 5H);  $^{13}\text{C-NMR}$  (600 MHz,  $\text{CDCl}_3$ )  $\delta$  31.13, 35.39, 70.38, 70.77, 73.32, 127.67, 127.91, 128.52, 137.60, 176.90.

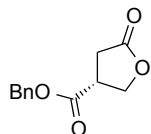

**benzyl (R)-5-oxotetrahydrofuran-3-carboxylate**

Yield: 58 %, e.r.: 89.3:10.7.  $t_R$  = 99.2 (major), 112.4 (minor) min.  $^1\text{H-NMR}$  (600 MHz,  $\text{CDCl}_3$ )  $\delta$  2.74 (dd,  $J$  = 9.7, 17.9 Hz, 1H), 2.87 (dd,  $J$  = 7.3, 17.9 Hz, 1H), 3.46–3.51 (m, 1H), 4.44 (dd,  $J$  = 6.5, 9.4 Hz, 1H), 4.50 (dd,  $J$  = 8.4, 9.4 Hz, 1H), 5.18 (s, 2H), 7.33–7.37 (m, 5H);  $^{13}\text{C-NMR}$  (600 MHz,  $\text{CDCl}_3$ )  $\delta$  30.83, 39.98, 67.57, 68.97, 128.43, 128.76, 134.93, 170.97, 175.7.

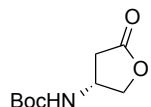

**tert-butyl (R)-(5-oxotetrahydrofuran-3-yl)carbamate<sup>8</sup>**

Yield: 92 %, e.r.: 97.8:2.2.  $[\alpha]_D^{25}$  = +53.53° ( $c$  = 0.5,  $\text{CHCl}_3$ ), (lit.  $[\alpha]_D^{25}$  = +56.0° ( $c$  = 1.0,  $\text{CHCl}_3$ ))<sup>8</sup>;  $^1\text{H-NMR}$  (600 MHz,  $\text{CDCl}_3$ )  $\delta$  1.47 (s, 9H), 2.47 (dd,  $J$  = 4.2, 17.9 Hz, 1H), 2.86 (dd,  $J$  = 7.7, 17.9 Hz, 1H), 4.24 (broad d,  $J$  = 7.7 Hz, 1H), 4.49 (broad s, 1H), 4.52 (dd,  $J$  = 6.0, 9.6 Hz, 1H), 4.87 (broad s, 1H);  $^{13}\text{C-NMR}$  (600 MHz,  $\text{CDCl}_3$ )  $\delta$  28.28, 47.71, 73.66, 80.64, 154.97, 174.99.

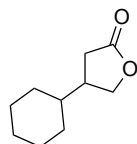

**(-)-4-cyclohexyldihydrofuran-2(3H)-one<sup>5</sup>**

Yield: 85 %, e.r.: 67.0:33.0. The stereoselectivity was determined by chiral HPLC analysis after conversion to hydroxyl benzylamide derivative.<sup>9</sup> The absolute configuration was not determined. [Daicel CHIRALCEL OD (0.46 x 25 cm);  $n$ -hexanes/2-propanol = 90/10, flow rate = 0.75 mL/min; Injection vol = 5  $\mu\text{L}$ ; detection wavelength 210 nm]:  $t_R$  = 14.8 (major), 22.0 (minor);  $[\alpha]_D^{25}$  = -4.09° ( $c$  = 0.45,  $\text{CHCl}_3$ ), (lit.  $[\alpha]_D^{25}$  = -6.8° ( $c$  = 0.5,  $\text{CHCl}_3$ ) for 61% ee);  $^1\text{H-NMR}$  (600 MHz,  $\text{CDCl}_3$ )  $\delta$  0.94–1.02 (m, 2H), 1.13–1.34 (m, 4H), 1.61–1.76 (m, 5H), 2.22 (dd,  $J$  = 9.9, 17.1 Hz, 1H), 2.32 (m, 1H), 2.56 (dd,  $J$  = 8.3, 17.1 Hz, 1H), 3.98 (t,  $J$  = 8.8 Hz), 4.42 (t,  $J$  = 8.4 Hz, 1H);  $^{13}\text{C-NMR}$  (150 MHz,  $\text{CDCl}_3$ )  $\delta$  25.77, 25.85, 26.15, 30.51, 31.17, 32.77, 41.43, 41.73, 72.27, 177.46.

<sup>8</sup> Bergman, Y.; Ciampini, M.; Jalal, S.; Lagiakos, H. L.; Aguilar, M.-I.; Perlmutter, P. *Tetrahedron Asymmetry*, **2008**, *19*, 2861–2863.

<sup>9</sup> Uchida, T.; Katsuki, T. *Helv. Chim. Acta*, **2002**, *85*, 3078–3089.



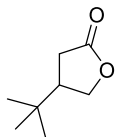

#### 4-*t*-butyldihydrofuran-2(3*H*)-one<sup>2</sup>

Yield: 80.3 %, e.r.: 56.6:43.4. The stereoselectivity was determined by chiral HPLC analysis after conversion to hydroxyl benzylamide derivative.<sup>9</sup> The absolute configuration was not determined. [Daicel CHIRALCEL OD (0.46 x 25 cm); *n*-hexanes/2-propanol = 90/10, flow rate = 0.75 mL/min; Injection vol = 5  $\mu$ L; detection wavelength 210 nm]:  $t_R$  = 10.4 (major), 14.5 (minor); <sup>1</sup>H-NMR (600 MHz, CDCl<sub>3</sub>)  $\delta$  0.93 (s, 9H), 2.32–2.38 (m, 1H), 2.41–2.48 (m, 2H), 4.08–4.11 (m, 1H), 4.31–4.34 (m, 1H); <sup>13</sup>C-NMR (150 MHz, CDCl<sub>3</sub>)  $\delta$  26.81, 30.07, 31.36, 45.88, 69.81, 177.45.

### 3. UV-Vis study and Jobs plot of Flavinium 3a and quinidine

The stoichiometry of the association between flavinium **3a** and quinidine was determined by using Job's method of continuous variation: The absorption (446 – 456 nm) of the samples wherein molar fractions of a solution **3a** and quinidine ( $1 \times 10^{-4}$  each in CH<sub>3</sub>CN) were varied while keeping the total concentration constant.

Each data point was subtracted with absorption of the individual compounds at the equimolar concentrations, and plotted against the molar ratio. The stoichiometry of the complex formed was determined from the inflection point in the Job's plots of absorbance vs. mole fraction at a particular wavelength between 446–456 nm. Each colored line represents absorbance at a particular wavelength from 446–456 nm ranges.

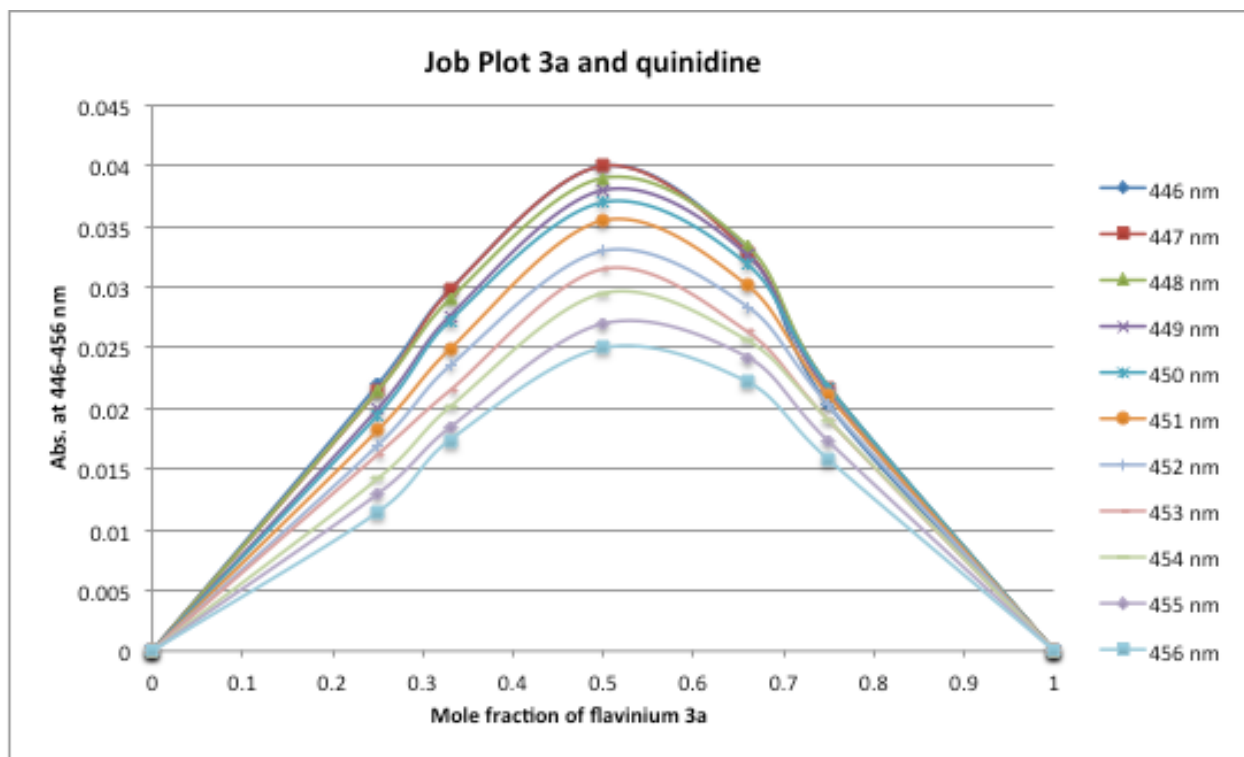

#### 4. Reaction screening data for Baeyer-Villiger oxidation of 3-phenylcyclobutanone

The structures of the compounds used in the screening study are shown in Figure S2. Unless otherwise specified, all the reactions were carried out using 0.1 mmol of 3-phenylcyclobutanone following the general experimental procedures described in section 1-4.

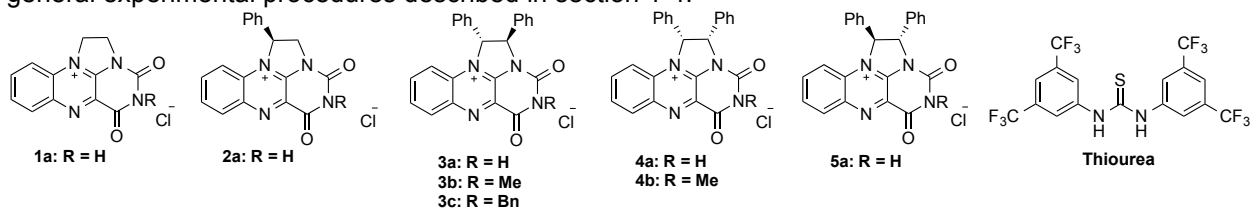

Figure S2: The structures of the compounds used in the screening study.

##### Base screening:

| Catalyst | Additive                                          | Solvent                            | Temp (°C) | Time (h) | GC Conv. (%) | ee (%) | e.r.      |           | Yield (%) |
|----------|---------------------------------------------------|------------------------------------|-----------|----------|--------------|--------|-----------|-----------|-----------|
|          |                                                   |                                    |           |          |              |        | RT = 34.9 | RT = 42.1 |           |
|          |                                                   | MeOH                               | -40       | 18       | N/A          | 2.8    | 51.4      | 48.6      |           |
|          |                                                   | MeCN                               | -20       | 18       | N/A          | 0.4    | 50.2      | 49.8      |           |
| 3a       |                                                   | MeCN                               | -25       | 18       | 10.4         | 0.4    | 50.2      | 49.8      |           |
| 3a       |                                                   | MeCN                               | -40       | 18       | 4.7          | 3.8    | 51.9      | 48.1      |           |
| 3b       |                                                   | MeCN                               | -40       | 24       | N/A          | 2.4    | 51.2      | 48.8      | 13        |
| 3a       |                                                   | MeOH                               | -40       | 18       | N/A          | 4.9    | 52.5      | 47.6      |           |
| 3a       |                                                   | CF <sub>3</sub> CH <sub>2</sub> OH | -40       | 24       | N/A          |        |           |           | 3         |
| 3b       |                                                   | MeCN                               | 0         | 24       | N/A          | 4.2    | 52.1      | 47.9      | 83        |
| 3b       | LiCl                                              | MeCN                               | 0         | 24       | N/A          | 3.8    | 51.9      | 48.1      | 91        |
| 3b       |                                                   | DCM                                | RT        | 24       | N/A          | 1.8    | 50.9      | 49.1      | 38        |
| 3b       |                                                   | MeOH                               | RT        | 24       | N/A          | 4.6    | 52.3      | 47.7      | 37        |
| 3b       |                                                   | MeCN                               | RT        | 22       | N/A          | 3.8    | 51.9      | 48.1      | 91        |
| 3a       | 20 mol% quinidine                                 | DCM                                | -79       | 18       | N/A          | 18     | 59.0      | 41.0      |           |
| 3a       | 20 mol% 1,2,2,6,6-pentamethyl-4-hydroxypiperidine | DCM                                | -79       | 18       | N/A          | 18.6   | 59.3      | 40.7      |           |
| 3a       | 15 mol% NaHCO <sub>3</sub>                        | MeOH                               | -40       | 24       | N/A          | 5.4    | 52.7      | 47.3      | 18        |
| 3a       | 100 mol% NaHCO <sub>3</sub>                       | MeOH                               | -40       | 24       | N/A          |        |           |           |           |
| 3a       | 20 mol% (-)-sparteine                             | MeCN                               | -42       | 18       | 23           | 4.8    | 47.6      | 52.4      |           |
| 3a       | 20 mol% 1,2,2,6,6-pentamethyl-4-hydroxypiperidine | MeCN                               | -42       | 18       | 12           | 23.4   | 61.7      | 38.3      |           |
| 3a       | TBS-protected quinidine                           | MeCN                               | -42       | 18       | 4.8          | 12.4   | 56.2      | 43.8      |           |
| 3a       | 100 mol% thiourea                                 | MeCN                               | -40       | 18       | N/A          | 1.6    | 50.8      | 49.2      |           |
| 3a       | 20 mol% Proton sponge                             | MeCN                               | -40       | 18       | 7.6          | 4.4    | 52.2      | 47.8      |           |
| 3a       | 20 mol% 4-methylmorpholine                        | MeCN                               | -40       | 18       | 9.7          | 10     | 55.0      | 45.0      |           |
| 3a       | 20 mol% 4-methylmorpholine N-oxide                | MeCN                               | -40       | 18       | 5.2          | 4.8    | 52.4      | 47.6      |           |
| 3a       | 20 mol% quinidine + 40 mol% [BMIM]Cl              | MeCN                               | -40       | 18       | 11.1         | 15.9   | 58.0      | 42.1      |           |
| 3a       | 20 mol% quinidine + 40 mol% [BMIM]Cl              | MeCN                               | -40       | 18       | 30           | 22.2   | 61.1      | 38.9      |           |
| 3a       | 20 mol% TMEDA                                     | MeCN                               | -40       | 18       | 1.2          | 8      | 54.0      | 46.0      |           |
| 3a       | 20 mol% 1,1,1,3,3,3-hexamethyldisilazine          | MeCN                               | -40       | 18       | 6            | 4.4    | 52.2      | 47.8      |           |
| 3a       | 20 mol% (-)-sparteine                             | MeCN                               | -40       | 18       | 30.4         | 1.6    | 49.2      | 50.8      |           |
| 3a       | 20 mol% D(+)-10-CSA                               | DCM                                | -40       | 45       | 17.3         | 13     | 56.5      | 43.5      |           |
| 3a       | 120 mol% MeSO <sub>2</sub> NH <sub>2</sub>        | DCM                                | -38       | 24       | 2.1          | 21.8   | 60.9      | 39.1      |           |
| 3a       | 100 mol% Boc-L-isolucinol                         | MeCN                               | -25       | 18       | N/A          | 6      | 53.0      | 47.0      |           |
| 3a       | 100 mol% R-(+)-2,2'-diamino-1,1'-binaphthalene    | MeCN                               | -25       | 18       | N/A          | 13     | 56.5      | 43.5      |           |
| 3a       | 100 mol% C <sub>6</sub> F <sub>6</sub>            | MeCN                               | -25       | 18       | N/A          | 6.8    | 53.4      | 46.6      |           |
| 3a       | 100 mol% R-(+)-2,2'-diamino-1,1'-binaphthalene    | MeCN                               | -25       | 18       | 1.5          | 0      | 50.0      | 50.0      |           |
| 3a       | 100 mol% HMPA                                     | MeCN                               | -25       | 18       | 1.2          | 6.2    | 53.1      | 46.9      |           |
| 3a       | 100 mol% (S)-(-)-N,N'-dimethyl-1-phenylethylamine | MeCN                               | -25       | 18       | 10           | 25.2   | 62.6      | 37.4      |           |
| 3a       | 100 mol% thiourea                                 | MeCN                               | -20       | 18       | N/A          | 0.8    | 50.4      | 49.6      |           |
| 3a       | 1.2 equiv. of MeSO <sub>2</sub> NH <sub>2</sub>   | DCM                                | -38       | 24       | 2.1          | 21.8   | 60.9      | 39.1      |           |
| 3a       | 100 mol% Et <sub>3</sub> N                        | MeCN                               | -40       | 18       | 60.5         | 24.4   | 62.2      | 37.8      |           |

**Base screening (cont.):**

| Catalyst | Additive                 | Solvent | Temp (°C)    | Time (h) | GC Conv. (%) | ee (%) | e.r.      |           | Yield (%) |
|----------|--------------------------|---------|--------------|----------|--------------|--------|-----------|-----------|-----------|
|          |                          |         |              |          |              |        | RT = 34.9 | RT = 42.1 |           |
| 3a       | 100 mol% DIPEA           | DCM     | -40          | 18       | 33           | 15.4   | 57.7      | 42.3      |           |
| 3a       | 100 mol% DABCO           | MeCN    | -35          | 18       | 21.2         | 28.6   | 64.3      | 35.7      |           |
|          | 100 mol% DABCO           | MeCN    | -35          | 18       | 7.9          | 1.4    | 50.7      | 49.3      |           |
| 3a       | 20 mol % 3-quinuclidinol | MeCN    | -35          | 18       | 38.3         | 36.2   | 68.1      | 31.9      |           |
| 3a       | 100 mol% quinine         | MeCN    | -40          | 18       | 16.9         | 53.8   | 76.9      | 23.1      |           |
| 3a       | 100 mol% quinidine       | MeCN    | -35          | 18       | 49.2         | 48.8   | 74.4      | 25.6      |           |
|          | 100 mol% quinidine       | MeCN    | -35          | 18       | 12.4         | 4.8    | 52.4      | 47.6      |           |
| 3a       | 20 mol% quinidine        | MeCN    | -35          | 18       | 21.3         | 48.4   | 74.2      | 25.8      |           |
| 3a       | 20 mol% (DHQ)2 PHAL      | DCM     | (-79 to -38) | 18       | N/A          | 56.6   | 78.3      | 21.7      |           |

**Solvent effects (earlier studies):**

| Catalyst | Additive             | Solvent  | Temp (°C) | Time (h) | GC Conv. (%) | ee (%) | e.r.      |           | Yield (%) |
|----------|----------------------|----------|-----------|----------|--------------|--------|-----------|-----------|-----------|
|          |                      |          |           |          |              |        | RT = 34.9 | RT = 42.1 |           |
|          |                      | MeOH     | -40       | 18       | N/A          | 2.8    | 51.4      | 48.6      |           |
|          |                      | MeCN     | -20       | 18       | N/A          | 0.4    | 50.2      | 49.8      |           |
| 3a       |                      | MeCN     | -40       | 18       | 4.7          | 3.8    | 51.9      | 48.1      |           |
| 3b       |                      | MeCN     | -40       | 24       | N/A          | 2.4    | 51.2      | 48.8      | 13        |
| 3a       |                      | MeOH     | -40       | 18       | N/A          | 4.9    | 52.5      | 47.6      |           |
| 3a       |                      | CF3CH2OH | -40       | 24       | N/A          |        |           |           | 3         |
| 3a       |                      | CF3CH2OH | -35       | 15       | 21           | 3.6    | 51.8      | 48.2      |           |
| 3a       | 100 mol% quinidine   | DCM      | -40       | 18       | 22.7         | 34     | 67.0      | 33.0      |           |
| 3a       | 100 mol% quinidine   | MeCN     | -35       | 18       | 49.2         | 48.8   | 74.4      | 25.6      |           |
| 3a       | 100 mol% quinidine   | CF3CH2OH | -35       | 15       | 94.6         | 2.4    | 51.2      | 48.8      |           |
| 3a       | 20 mol % quinidine   | MeOH     | -40       | 18       | 6.2          | 2.6    | 51.3      | 48.7      |           |
| 3a       | 100 mol% quinidine   | MeCN     | -25       | 18       | 37.3         | 39.4   | 69.7      | 30.3      |           |
| 3a       | 170 mol% quinidine   | EtOAc    | -37       | 50       | 22.4         | 28     | 64.0      | 36.0      |           |
| 3a       | 170 mol% quinidine   | DMF      | -37       | 50       | 10.2         | N/A    |           |           |           |
| 3a       | 20 mol% (DHQ)2 PHAL  | MeOH     | -40       | 18       | 7.6          | 35.6   | 67.8      | 32.2      |           |
| 3a       | 20 mol% (DHQD)2PHAL  | EtOAc    | -38       | 24       | 24.7         | 7.8    | 53.9      | 46.1      |           |
| 3a       | 10 mol % (DHQ)2 PHAL | Et2O     | -38       | 24       | 3.9          | N/A    |           |           |           |
| 3a       | 10 mol % (DHQ)2 PHAL | THF      | -38       | 24       | 2.2          | N/A    |           |           |           |

**Stoichiometry of the base (cinchona alkaloid monomer):**

| Catalyst | Additive           | Solvent | Temp (°C) | Time (h) | GC Conv. (%) | ee (%) | e.r.      |           | Yield (%) |
|----------|--------------------|---------|-----------|----------|--------------|--------|-----------|-----------|-----------|
|          |                    |         |           |          |              |        | RT = 34.9 | RT = 42.1 |           |
| 3a       | 100 mol% quinine   | MeCN    | -40       | 18       | 16.9         | 53.8   | 76.9      | 23.1      |           |
| 3a       | 100 mol% quinidine | MeCN    | -35       | 18       | 49.2         | 48.8   | 74.4      | 25.6      |           |
| 3a       | 170 mol% quinidine | MeCN    | -37       | 50       | 83           | 51.2   | 75.6      | 24.4      |           |
| 3a       | 10 mol % quinidine | MeCN    | -35       | 18       | 3.7          | 10.2   | 55.1      | 44.9      |           |
| 3a       | 20 mol% quinidine  | MeCN    | -35       | 18       | 21.3         | 48.4   | 74.2      | 25.8      |           |
| 3a       | 30 mol% quinidine  | MeCN    | -35       | 18       | 25.3         | 50.4   | 75.2      | 24.8      |           |
| 3a       | 40 mol% quinidine  | MeCN    | -35       | 18       | 29.5         | 49.6   | 74.8      | 25.2      |           |
| 3a       | 50 mol % quinidine | MeCN    | -35       | 18       | 28           | 49.2   | 74.6      | 25.4      |           |
| 3a       | 20 mol% quinidine  | MeCN    | -35       | 18       | 13.1         | 50     | 75.0      | 25.0      |           |

**Structure-activity relationship (monomer):**

| Catalyst | Additive                | Solvent | Temp (°C) | Time (h) | GC Conv. (%) | ee (%) | e.r.      |           | Yield (%) |
|----------|-------------------------|---------|-----------|----------|--------------|--------|-----------|-----------|-----------|
|          |                         |         |           |          |              |        | RT = 34.9 | RT = 42.1 |           |
| 3a       | 100 mol% quinine        | MeCN    | -40       | 18       | 16.9         | 53.8   | 76.9      | 23.1      |           |
| 3a       | 100 mol% quinidine      | MeCN    | -35       | 18       | 49.2         | 48.8   | 74.4      | 25.6      |           |
|          | 100 mol% quinidine      | MeCN    | -35       | 18       | 12.4         | 4.8    | 52.4      | 47.6      |           |
| 3a       | 20 mol% quinidine       | MeCN    | -35       | 18       | 21.3         | 48.4   | 74.2      | 25.8      |           |
| 3a       | TBS-protected quinidine | MeCN    | -42       | 18       | 4.8          | 12.4   | 56.2      | 43.8      |           |
| 3c       | 10 mol % quinidine      | MeCN    | -40       | 18       | 3.1          | 2.5    | 48.8      | 51.3      |           |
| 3c       | 20 mol % quinidine      | MeCN    | -40       | 18       | 6.8          | 3.8    | 48.1      | 51.9      |           |
| 4a       | 20 mol % quinidine      | MeCN    | -40       | 18       | 3.1          | 6.8    | 53.4      | 46.6      |           |
| 4b       | 20 mol % quinidine      | MeCN    | -40       | 18       | 3.3          | 0.8    | 50.4      | 49.6      |           |
| 1a       | 20 mol% quinidine       | MeCN    | -40       | 18       | 13.6         | 18.8   | 59.4      | 40.6      |           |
| 5a       | 20 mol% quinidine       | MeCN    | -40       | 18       | 12           | 13.8   | 43.1      | 56.9      |           |
| 5a       | 20 mol% quinine         | MeCN    | -40       | 18       | 13.3         | 21     | 39.5      | 60.5      |           |
| 5a       | 20 mol% N-Bn quinidine  | MeCN    | -40       | 18       | 1.7          | 4.8    | 47.6      | 52.4      |           |

*Stoichiometry of the base (cinchona alkaloid dimer) and solvent effects:*

| Catalyst | Additive             | Solvent | Temp (°C) | Time (h) | GC Conv. (%) | ee (%) | e.r.      |           | Yield (%) |
|----------|----------------------|---------|-----------|----------|--------------|--------|-----------|-----------|-----------|
|          |                      |         |           |          |              |        | RT = 34.9 | RT = 42.1 |           |
| 3a       | 20 mol% (DHQD)2 PHAL | MeCN    | -40       | 18       | 28.5         | 6      | 53.0      | 47.0      |           |
| 3a       | 20 mol% (DHQD)2AQN   | MeCN    | -38       | 24       | 42.7         | 8.6    | 54.3      | 45.7      |           |
| 3a       | 20 mol% (DHQD)2Pyr   | MeCN    | -38       | 24       | 33.8         | 10.2   | 44.9      | 55.1      |           |
| 3a       | 20 mol% (DHQ)2PHAL   | MeCN    | -38       | 24       | 33.7         | 43.8   | 71.9      | 28.1      |           |
| 3a       | 20 mol% (DHQ)2AQN    | MeCN    | -38       | 24       | 25           | 33.6   | 66.8      | 33.2      |           |
| 3a       | 20 mol% (DHQ)2Pyr    | MeCN    | -38       | 24       | 29.3         | 33.4   | 66.7      | 33.3      |           |
| 3a       | 20 mol% (DHQD)2AQN   | EtOAc   | -38       | 24       | 22.5         | 11.4   | 55.7      | 44.3      |           |
| 3a       | 20 mol% (DHQD)2Pyr   | EtOAc   | -38       | 24       | 22.1         | 8.6    | 45.7      | 54.3      |           |
| 3a       | 20 mol% (DHQ)2PHAL   | EtOAc   | -38       | 24       | 27.6         | 48.2   | 74.1      | 25.9      |           |
| 3a       | 20 mol% (DHQ)2PHAL   | EtOAc   | -35       | 20       | 10.4         | 60.5   | 80.3      | 19.8      |           |
| 3a       | 20 mol% (DHQ)2AQN    | EtOAc   | -38       | 24       | 21.5         | 26.2   | 63.1      | 36.9      |           |
| 3a       | 20 mol% (DHQ)2Pyr    | EtOAc   | -38       | 24       | 25.3         | 38.6   | 69.3      | 30.7      |           |
| 3a       | 20 mol% (DHQD)2PHAL  | DCM     | -38       | 24       | 15.5         | 15.2   | 57.6      | 42.4      |           |
| 3a       | 20 mol% (DHQD)2AQN   | DCM     | -38       | 24       | 16.7         | 17.8   | 58.9      | 41.1      |           |
| 3a       | 20 mol% (DHQD)2Pyr   | DCM     | -38       | 24       | 18.5         | 21.2   | 59.4      | 40.6      |           |
| 3a       | 20 mol% (DHQ)2PHAL   | DCM     | -38       | 24       | 21.5         | 59.8   | 79.9      | 20.1      |           |
| 3a       | 20 mol% (DHQ)2AQN    | DCM     | -38       | 24       | 14.9         | 43.4   | 71.7      | 28.3      |           |
| 3a       | 20 mol% (DHQ)2Pyr    | DCM     | -38       | 24       | 22           | 67     | 83.5      | 16.5      |           |
| 3a       | 10 mol % (DHQ)2 PHAL | CHCl3   | -38       | 24       | 17.6         | 87.2   | 93.6      | 6.4       |           |
| 3a       | 20 mol % (DHQ)2 PHAL | CHCl3   | -38       | 24       | 16.6         | 84     | 92.0      | 8.0       |           |
| 3a       | 30 mol % (DHQ)2 PHAL | CHCl3   | -38       | 24       | 12.5         | 87     | 93.5      | 6.5       |           |

*Structure-activity relationship (dimer):*

| Catalyst     | Additive             | Solvent | Temp (°C) | Time (h) | GC Conv. (%) | ee (%) | e.r.      |           | Yield (%) |
|--------------|----------------------|---------|-----------|----------|--------------|--------|-----------|-----------|-----------|
|              |                      |         |           |          |              |        | RT = 34.9 | RT = 42.1 |           |
| 3a           | 10 mol% (DHQ)2 PHAL  | DCM     | -38       | 24       | 33.6         | 58     | 79.0      | 21.0      |           |
| 3a           | 20 mol% (DHQ)2PHAL   | DCM     | -38       | 24       | 21.5         | 59.8   | 79.9      | 20.1      |           |
| 3a           | 20 mol% (DHQD)2PHAL  | MeCN    | -38       | 24       | 33.9         | 6      | 53.0      | 47.0      |           |
| 3b           | 20 mol% (DHQ)2PHAL   | DCM     | -38       | 24       | 18.9         | 36.6   | 68.3      | 31.7      |           |
| 5a           | 20 mol% (DHQ)2PHAL   | DCM     | -38       | 24       | 7.4          | 2.6    | 48.7      | 51.3      |           |
| 5a           | 10 mol% (DHQD)2PHAL  | DCM     | -38       | 24       | 9.7          | 34.6   | 32.7      | 67.3      |           |
| 5a           | 20 mol% (DHQD)2PHAL  | DCM     | -38       | 24       | 18           | 52.2   | 23.9      | 76.1      |           |
| 1a           | 20 mol% (DHQ)2PHAL   | DCM     | -38       | 24       | 8.1          | 39.4   | 69.7      | 30.3      |           |
| 1a           | 20 mol% (DHQD)2PHAL  | DCM     | -38       | 24       | 5.6          | 4.4    | 47.8      | 52.2      |           |
| 2a           | 20 mol% (DHQ)2 PHAL  | DCM     | -38       | 24       | 16.4         | 31     | 65.5      | 34.5      |           |
| 2a           | 20 mol% (DHQD)2 PHAL | DCM     | -38       | 24       | 42.1         | 13.6   | 43.2      | 56.8      |           |
| 5a (10 mol%) | 20 mol% (DHQD)2 PHAL | EtOAc   | -35       | 20       | 9.4          | 49.4   | 25.3      | 74.7      |           |
| 2a (10 mol%) | 20 mol% (DHQD)2 PHAL | EtOAc   | -35       | 20       | 12.8         | 35.6   | 32.2      | 67.8      |           |

*Reaction optimization (reaction conversion) – combination of other bases:*

| Catalyst | Additive                                         | Solvent | Temp (°C) | Time (h) | GC Conv. (%) | ee (%) | e.r.      |           | Yield (%) |
|----------|--------------------------------------------------|---------|-----------|----------|--------------|--------|-----------|-----------|-----------|
|          |                                                  |         |           |          |              |        | RT = 34.9 | RT = 42.1 |           |
| 3a       | 20 mol% (DHQ)2PHAL                               | DCM     | -38       | 24       | 21.5         | 59.8   | 79.9      | 20.1      |           |
| 3a       | 20 mol% (DHQ)2PHAL, 80 mol% quinine              | DCM     | -38       | 24       | 67.9         | 57.8   | 78.9      | 21.1      |           |
| 3a       | 20 mol% (DHQ)2PHAL, 80 mol% Et3N                 | DCM     | -38       | 24       | 59.7         | 42.7   | 71.4      | 28.7      |           |
| 3a       | 20 mol% (DHQ)2PHAL, 80 mol% DMAP                 | DCM     | -38       | 24       | 43.3         | 44.8   | 72.4      | 27.6      |           |
| 3a       | 120 mol% MeSO2NH2                                | DCM     | -38       | 24       | 2.1          | 21.8   | 60.9      | 39.1      |           |
| 3a       | 20 mol % (DHQ)2 PHAL, 100 mol% MeSO2NH2          | DCM     | -38       | 24       | 29.5         | 65.9   | 83.0      | 17.1      |           |
| 3a       | 20 mol% (DHQ)2 PHAL, 80 mol% quinine             | DCM     | -38       | 24       | 67.9         | 57.8   | 78.9      | 21.1      |           |
| 3a       | 20 mol% (DHQ)2 PHAL, 80 mol% Et3N                | DCM     | -38       | 24       | 59.7         | 42.7   | 71.4      | 28.7      |           |
| 3a       | 20 mol% (DHQ)2 PHAL, 80 mol% DMAP                | DCM     | -38       | 24       | 43.3         | 44.8   | 72.4      | 27.6      |           |
| 3a       | 1.2 equiv. of MeSO2NH2                           | DCM     | -38       | 24       | 2.1          | 21.8   | 60.9      | 39.1      |           |
| 3a       | 1 equiv. of MeSO2NH2 + 0.2 equiv. of (DHQ)2 PHAL | DCM     | -38       | 24       | 29.5         | 65.9   | 83.0      | 17.1      |           |

**Reaction optimization (reaction conversion) – temperature effect:**

| Catalyst     | Additive                                                  | Solvent    | Temp (°C)  | Time (h) | GC Conv. (%) | ee (%) | e.r.      |           | Yield (%) |
|--------------|-----------------------------------------------------------|------------|------------|----------|--------------|--------|-----------|-----------|-----------|
|              |                                                           |            |            |          |              |        | RT = 34.9 | RT = 42.1 |           |
| 3a           | 10 mol % (DHQ)2 PHAL                                      | CHCl3      | -38        | 5d       | 46.4         | 87.2   | 93.6      | 6.4       |           |
| 3a           | 20 mol % (DHQ)2 PHAL                                      | CHCl3      | -38        | 5d       | 38.2         | 84     | 92.0      | 8.0       |           |
| 3a           | 30 mol % (DHQ)2 PHAL                                      | CHCl3      | -38        | 5d       | 27.6         | 87     | 93.5      | 6.5       |           |
| 3a           | 20 mol % (DHQ)2 PHAL, 2 mL solvent                        | CHCl3      | -38        | 5d       | 35.3         | 82.6   | 91.3      | 8.7       |           |
| 3a           | 20 mol % (DHQ)2 PHAL, 2 mL solvent, 2 equiv. of H2O2      | CHCl3      | -38        | 5d       | 41.8         | 78.8   | 89.4      | 10.6      |           |
| 3a           | 20 mol % (DHQ)2 PHAL, 2 mL solvent, 2 equiv. of urea.H2O2 | CHCl3      | -38        | 5d       | 14.9         | 48.6   | 74.3      | 25.7      |           |
| 3a           | 5 mol % (DHQ)2 PHAL                                       | CHCl3      | -38 to -29 | 24       | 26.2         | 61     | 80.5      | 19.5      |           |
| 3a           | 20 mol % (DHQ)2 PHAL                                      | CHCl3      | -38 to -29 | 24       | 34.6         | 83.8   | 91.9      | 8.1       |           |
| 3a           | 50 mol % (DHQ)2 PHAL                                      | CHCl3      | -38 to -29 | 24       | 23.1         | 66.6   | 83.3      | 16.7      |           |
| 3a           | 5 mol % (DHQ)2 PHAL                                       | CHCl3      | -38 to -29 | 24       | 26.2         | 61     | 80.5      | 19.5      |           |
| 3a           | 20 mol % (DHQ)2 PHAL                                      | CHCl3      | -38 to -29 | 24       | 34.6         | 83.8   | 91.9      | 8.1       |           |
| 3a           | 50 mol % (DHQ)2 PHAL                                      | CHCl3      | -38 to -29 | 24       | 23.1         | 66.6   | 83.3      | 16.7      |           |
| 3a           | 10 mol% of (DHQ)2 PHAL                                    | CHCl3      | -15 to -20 | 24       | 70           | 87.6   | 93.8      | 6.2       |           |
| 3a           | 10 mol% of (DHQ)2 PHAL + 5 mol% of quinine sulfate        | CHCl3      | -20 to -15 | 24       | 71.2         | 85.2   | 92.6      | 7.4       |           |
| 3a (20 mol%) | 20 mol% of (DHQ)2 PHAL                                    | CHCl3      | -20 to -15 | 24       | 92           | 88.8   | 94.4      | 5.6       |           |
| 3a           | 10 mol% of (DHQ)2 PHAL                                    | CHCl3      | -10 to -8  | 42       | 86.2         | 84.2   | 92.1      | 7.9       |           |
| 3a           | 20 mol% of (DHQ)2 PHAL                                    | CHCl3      | -10 to -8  | 42       | 97.2         | 85.4   | 92.7      | 7.3       |           |
| 3a           | 10 mol% of (DHQ)2 PHAL                                    | CHCl3      | -4 to 2    | 24       | 81.4         | 81.8   | 90.9      | 9.1       |           |
| 3a           | 20 mol% of (DHQ)2 PHAL                                    | CHCl3      | -4 to 2    | 24       | 91.6         | 83.8   | 91.9      | 8.1       |           |
| 3a           | 20 mol% quinidine                                         | DCM        | -77 to RT  | 18       | 0.6          | 23.4   | 61.7      | 38.3      |           |
| 3a           | 20 mol% (DHQD)2 PHAL                                      | DCM        | -77 to RT  | 18       | 0.5          | 11.6   | 44.2      | 55.8      |           |
| 3a           | 20 mol% (DHQ)2 AQN                                        | DCM        | -77 to RT  | 18       | 0.4          | 37.8   | 68.9      | 31.1      |           |
| 3a           | 20 mol% (DHQ)2 AQN                                        | MeCN       | RT         | 20.5     | 8.7          | 13.5   | 56.8      | 43.3      |           |
| 3a           | 20 mol% (DHQ)2 PHAL                                       | MeCN + DCM | RT         | 18       | 2.9          | 34.6   | 67.3      | 32.7      |           |

## 5. NMR spectral data:

### (1S, 2R)-1,2-Diphenyl-2-[(2-nitrophenyl)amino]ethan-1-ol (S5)

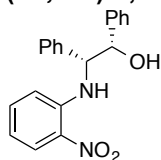

7/26/2013 7:55:31 PM

|                        |                                                                                           |                      |              |                        |                      |
|------------------------|-------------------------------------------------------------------------------------------|----------------------|--------------|------------------------|----------------------|
| Acquisition Time (sec) | 2.7263                                                                                    | Comment              | 1H           | Date                   | 05 Feb 2013 15:50:08 |
| Date Stamp             | 05 Feb 2013 15:50:08                                                                      |                      |              |                        |                      |
| File Name              | C:\Users\Kana.Yamamoto\Desktop\Chiral flavinium salts\sample data\NMR\KA-1-37\2\data\111r |                      |              | Frequency (MHz)        | 600.20               |
| Nucleus                | 1H                                                                                        | Number of Transients | 16           | Origin                 | spect                |
| Owner                  | kenji                                                                                     | Points Count         | 65536        | Pulse Sequence         | zg30                 |
| SW(cyclical) (Hz)      | 12019.23                                                                                  | Solvent              | CHLOROFORM-d | Receiver Gain          | 10.73                |
| Spectrum Type          | STANDARD                                                                                  | Sweep Width (Hz)     | 12019.05     | Temperature (degree C) | 22.050               |
|                        |                                                                                           |                      |              | Spectrum Offset (Hz)   | 3689.1606            |

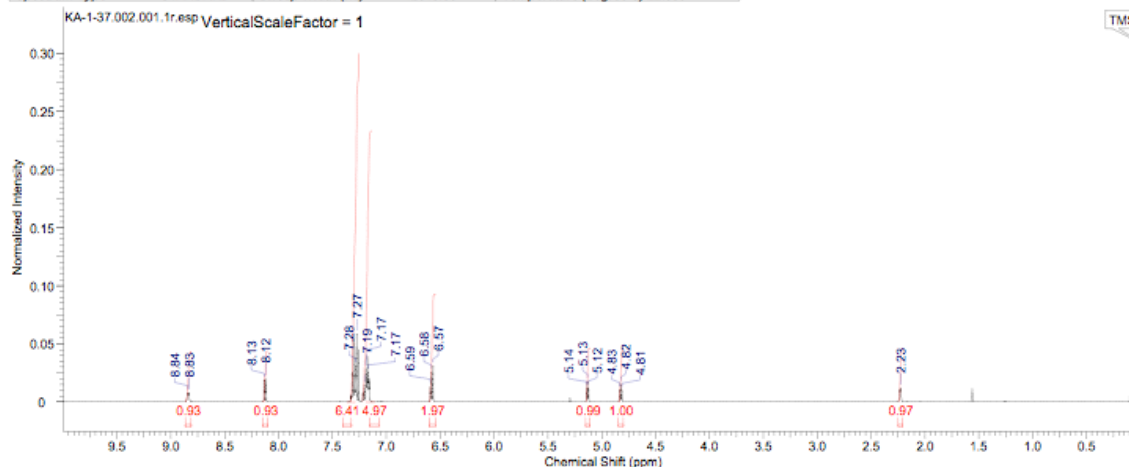

| No. | (ppm) | (Hz)   | Height |
|-----|-------|--------|--------|-----|-------|--------|--------|-----|-------|--------|--------|-----|-------|--------|--------|
| 1   | 2.23  | 1337.0 | 0.0118 | 6   | 5.13  | 3080.0 | 0.0177 | 11  | 7.17  | 4301.8 | 0.0257 | 16  | 7.28  | 4372.4 | 0.0313 |
| 2   | 4.81  | 2888.9 | 0.0099 | 7   | 5.14  | 3084.8 | 0.0111 | 12  | 7.17  | 4305.7 | 0.0389 | 17  | 8.12  | 4873.1 | 0.0206 |
| 3   | 4.82  | 2894.6 | 0.0150 | 8   | 6.57  | 3940.9 | 0.0309 | 13  | 7.19  | 4314.1 | 0.0288 | 18  | 8.13  | 4880.2 | 0.0186 |
| 4   | 4.83  | 2900.5 | 0.0106 | 9   | 6.58  | 3949.7 | 0.0259 | 14  | 7.20  | 4323.3 | 0.0146 | 19  | 8.83  | 5301.3 | 0.0080 |
| 5   | 5.12  | 3075.4 | 0.0118 | 10  | 6.59  | 3955.4 | 0.0137 | 15  | 7.27  | 4365.8 | 0.0588 | 20  | 8.84  | 5307.6 | 0.0080 |

11/26/2013 9:36:41 PM

|                        |                                                                                           |                      |              |                        |                      |
|------------------------|-------------------------------------------------------------------------------------------|----------------------|--------------|------------------------|----------------------|
| Acquisition Time (sec) | 0.9088                                                                                    | Comment              | 13C          | Date                   | 05 Feb 2013 15:39:28 |
| Date Stamp             | 05 Feb 2013 15:39:28                                                                      |                      |              |                        |                      |
| File Name              | C:\Users\Kana.Yamamoto\Desktop\Chiral flavinium salts\sample data\NMR\KA-1-37\1\data\111r |                      |              | Frequency (MHz)        | 150.92               |
| Nucleus                | 13C                                                                                       | Number of Transients | 256          | Origin                 | spect                |
| Owner                  | kenji                                                                                     | Points Count         | 32768        | Pulse Sequence         | zgpg30               |
| SW(cyclical) (Hz)      | 30057.69                                                                                  | Solvent              | CHLOROFORM-d | Receiver Gain          | 173.95               |
| Spectrum Type          | STANDARD                                                                                  | Sweep Width (Hz)     | 36056.59     | Temperature (degree C) | 22.050               |
|                        |                                                                                           |                      |              | Spectrum Offset (Hz)   | 15065.4600           |

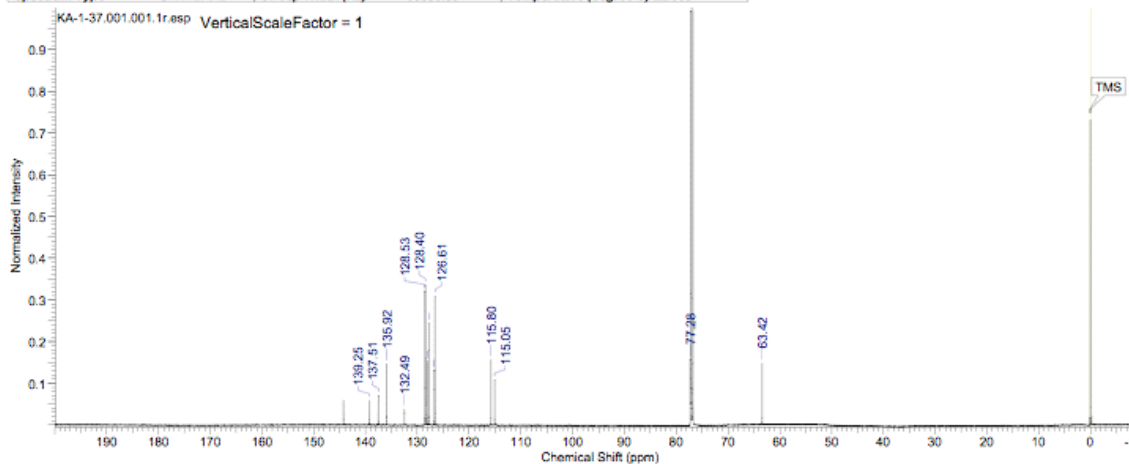

| No. | (ppm)  | (Hz)    | Height |
|-----|--------|---------|--------|-----|--------|---------|--------|-----|--------|---------|--------|-----|--------|---------|--------|
| 1   | 63.42  | 9570.8  | 0.1479 | 5   | 126.61 | 19107.9 | 0.3088 | 9   | 128.40 | 19378.6 | 0.3350 | 13  | 135.92 | 20513.2 | 0.1477 |
| 2   | 77.26  | 11662.7 | 0.1574 | 6   | 126.70 | 19122.3 | 0.1316 | 10  | 128.43 | 19383.0 | 0.1604 | 14  | 137.51 | 20753.0 | 0.0713 |
| 3   | 115.05 | 17362.7 | 0.1084 | 7   | 127.75 | 19280.7 | 0.2439 | 11  | 128.53 | 19387.4 | 0.3207 | 15  | 139.25 | 21016.0 | 0.0588 |
| 4   | 115.80 | 17476.1 | 0.1566 | 8   | 128.08 | 19330.2 | 0.1531 | 12  | 132.49 | 19996.0 | 0.0385 |     |        |         |        |

(1R, 2R)-1,2-Diphenyl-2-[(2-nitrophenyl)amino]ethan-1-ol (S6)

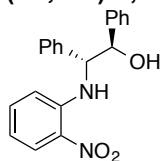

7/26/2013 8:48:48 PM

|                        |                                                                                          |                      |              |                        |                      |
|------------------------|------------------------------------------------------------------------------------------|----------------------|--------------|------------------------|----------------------|
| Acquisition Time (sec) | 2.7263                                                                                   | Comment              | 1H           | Date                   | 13 Feb 2013 22:52:32 |
| Date Stamp             | 13 Feb 2013 22:52:32                                                                     |                      |              |                        |                      |
| File Name              | C:\Users\Kana Yamamoto\Desktop\Chiral flavinium salts\sample data\NMR\KA-2-6\1\data\1\1r |                      |              | Frequency (MHz)        | 600.20               |
| Nucleus                | 1H                                                                                       | Number of Transients | 16           | Origin                 | spect                |
| Owner                  | kenji                                                                                    | Points Count         | 65536        | Pulse Sequence         | zg30                 |
| SW(cyclical) (Hz)      | 12019.23                                                                                 | Solvent              | CHLOROFORM-d | Receiver Gain          | 9.93                 |
| Spectrum Type          | STANDARD                                                                                 | Sweep Width (Hz)     | 12019.05     | Temperature (degree C) | 22.047               |
|                        |                                                                                          |                      |              | Spectrum Offset (Hz)   | 3688.4270            |

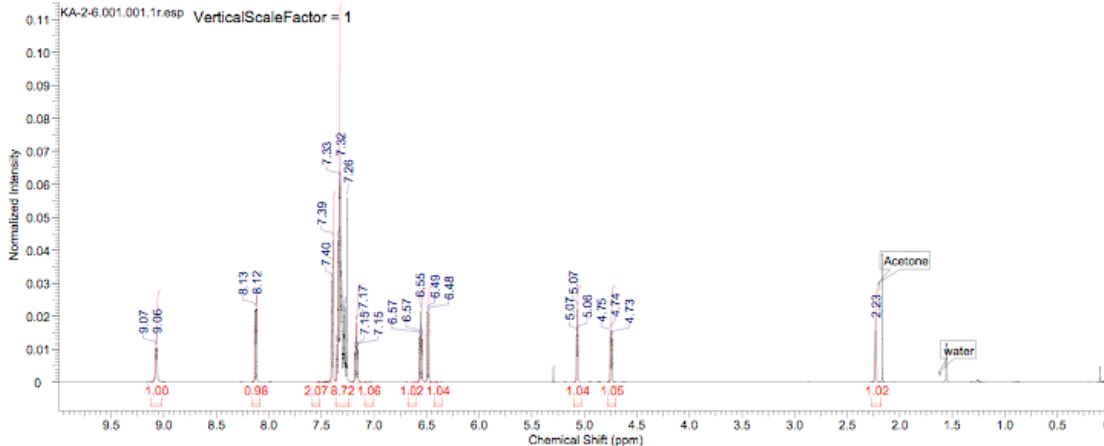

| No. | (ppm)  | Value         | Absolute Value | Non-Negative Value |
|-----|--------|---------------|----------------|--------------------|
| 1   | 2.1778 | 2.26101647432 | 1.49682510e+7  | 1.01647437         |
| 2   | 4.7018 | 4.77104501557 | 1.53865390e+7  | 1.04501557         |
| 3   | 5.0303 | 5.09103787732 | 1.52834230e+7  | 1.03787732         |
| 4   | 6.4513 | 6.51104009843 | 1.53161310e+7  | 1.04009843         |
| 5   | 6.5221 | 6.59102017236 | 1.50227080e+7  | 1.02017236         |
| 6   | 7.1224 | 7.20106464612 | 1.56776110e+7  | 1.06464612         |
| 7   | 7.2358 | 7.36871718971 | 1.28366336e+8  | 8.71718979         |
| 8   | 7.9658 | 7.43206572006 | 3.04190620e+7  | 2.06572008         |
| 9   | 8.0636 | 8.16097711331 | 1.43886340e+7  | 0.97711331         |
| 10  | 9.0241 | 9.11100047028 | 1.47325810e+7  | 1.00047028         |

7/26/2013 8:53:17 PM

|                        |                                                                                          |                      |              |                        |                      |                       |            |
|------------------------|------------------------------------------------------------------------------------------|----------------------|--------------|------------------------|----------------------|-----------------------|------------|
| Acquisition Time (sec) | 0.9088                                                                                   | Comment              | 13C          | Date                   | 13 Feb 2013 23:07:28 |                       |            |
| Date Stamp             | 13 Feb 2013 23:07:28                                                                     |                      |              |                        |                      |                       |            |
| File Name              | C:\Users\Kana Yamamoto\Desktop\Chiral flavinium salts\sample data\NMR\KA-2-6\2\data\1\1r |                      |              |                        | Frequency (MHz)      | 150.92                |            |
| Nucleus                | 13C                                                                                      | Number of Transients | 256          | Origin                 | spect                | Original Points Count | 32768      |
| Owner                  | kenji                                                                                    | Points Count         | 32768        | Pulse Sequence         | zgpg30               | Receiver Gain         | 173.95     |
| SW(cyclical) (Hz)      | 36057.69                                                                                 | Solvent              | CHLOROFORM-d |                        |                      | Spectrum Offset (Hz)  | 15085.4600 |
| Spectrum Type          | STANDARD                                                                                 | Sweep Width (Hz)     | 36056.59     | Temperature (degree C) | 22.051               |                       |            |

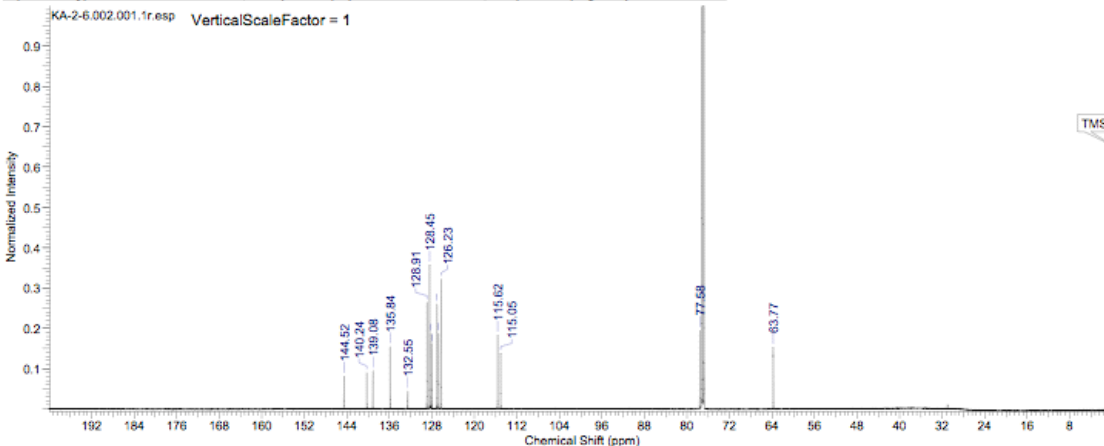

| No. | (ppm)  | (Hz)    | Height |
|-----|--------|---------|--------|-----|--------|---------|--------|-----|--------|---------|--------|-----|--------|---------|--------|
| 1   | 63.77  | 9624.8  | 0.1528 | 5   | 126.23 | 19050.7 | 0.3216 | 9   | 128.16 | 19341.2 | 0.1863 | 13  | 135.84 | 20501.0 | 0.1544 |
| 2   | 77.58  | 11708.9 | 0.1953 | 6   | 126.73 | 19125.6 | 0.1882 | 10  | 128.45 | 19385.2 | 0.3573 | 14  | 139.08 | 20990.7 | 0.0944 |
| 3   | 115.05 | 17363.8 | 0.1385 | 7   | 127.03 | 19171.8 | 0.2611 | 11  | 128.91 | 19455.7 | 0.2646 | 15  | 140.24 | 21164.6 | 0.0904 |
| 4   | 115.62 | 17449.7 | 0.1824 | 8   | 128.05 | 19324.7 | 0.1599 | 12  | 132.55 | 20004.8 | 0.0448 | 16  | 144.52 | 21810.5 | 0.0821 |

(1*R*, 2*S*)-1,2-Diphenyl-2-[(2-nitrophenyl)amino]ethan-1-ol (S7)

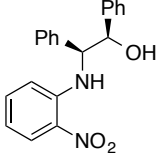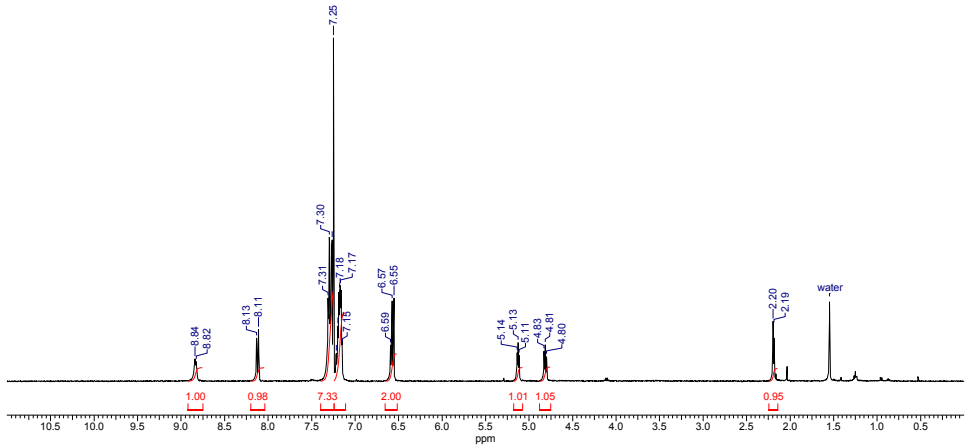

| No. | (ppm) | (Hz)   | No. | (ppm) | (Hz)   | No. | Annotation | (ppm) |
|-----|-------|--------|-----|-------|--------|-----|------------|-------|
| 1   | 2.19  | 873.9  | 13  | 7.17  | 2866.5 | 1   | water      | 1.55  |
| 2   | 2.20  | 878.0  | 14  | 7.18  | 2871.3 |     |            |       |
| 3   | 4.80  | 1919.1 | 15  | 7.20  | 2878.6 |     |            |       |
| 4   | 4.81  | 1925.3 | 16  | 7.22  | 2885.9 |     |            |       |
| 5   | 4.83  | 1930.8 | 17  | 7.25  | 2899.5 |     |            |       |
| 6   | 5.11  | 2045.5 | 18  | 7.27  | 2905.7 |     |            |       |
| 7   | 5.13  | 2050.2 | 19  | 7.30  | 2918.9 |     |            |       |
| 8   | 5.14  | 2054.6 | 20  | 7.31  | 2924.4 |     |            |       |
| 9   | 6.55  | 2620.8 | 21  | 8.11  | 3243.7 |     |            |       |
| 10  | 6.57  | 2629.2 | 22  | 8.13  | 3252.9 |     |            |       |
| 11  | 6.59  | 2636.2 | 23  | 8.82  | 3529.4 |     |            |       |
| 12  | 7.15  | 2858.1 | 24  | 8.84  | 3535.2 |     |            |       |

Neptune\data1\kanay\rs400\KY-2-22p

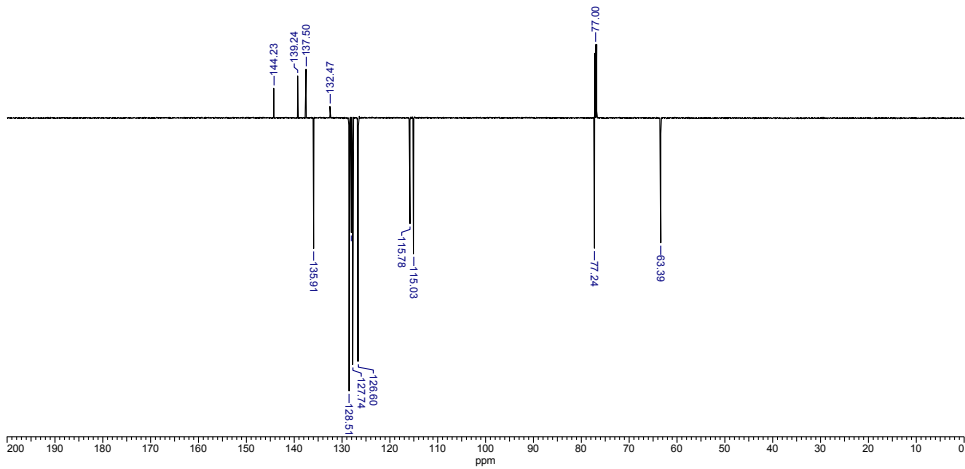

| No. | (ppm)  | (Hz)    | No. | (ppm)  | (Hz)    |
|-----|--------|---------|-----|--------|---------|
| 1   | 63.39  | 9566.3  | 10  | 128.38 | 19375.5 |
| 2   | 77.00  | 11620.8 | 11  | 128.41 | 19380.0 |
| 3   | 77.24  | 11657.2 | 12  | 128.51 | 19394.3 |
| 4   | 115.03 | 17360.7 | 13  | 132.47 | 19991.8 |
| 5   | 115.78 | 17474.0 | 14  | 135.91 | 20512.3 |
| 6   | 126.60 | 19105.9 | 15  | 137.50 | 20751.1 |
| 7   | 126.68 | 19119.1 | 16  | 139.24 | 21014.1 |
| 8   | 127.74 | 19278.7 | 17  | 144.23 | 21766.8 |
| 9   | 128.06 | 19327.1 |     |        |         |

Avance600\nmrdata\kanay\KY-2-22\_001001r



# (2S)-2-Phenyl-2-[(2-nitrophenyl)amino]ethan-1-ol (S8)

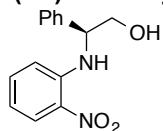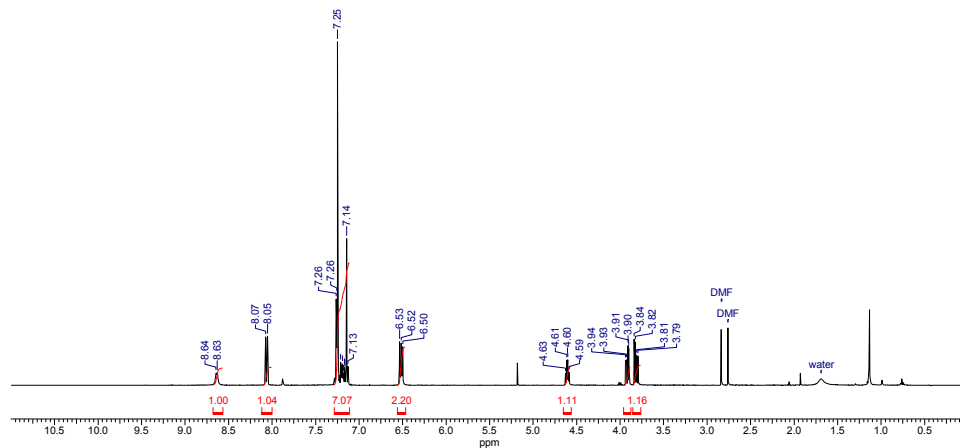

| No. | (ppm) | (Hz)   | No. | (ppm) | (Hz)   | No. | (ppm) | (Hz)   | No. | Annotation | (ppm)         |
|-----|-------|--------|-----|-------|--------|-----|-------|--------|-----|------------|---------------|
| 1   | 3.79  | 1517.8 | 13  | 4.62  | 1847.0 | 25  | 7.18  | 2871.0 | 1   | water      | 1.69          |
| 2   | 3.81  | 1524.0 | 14  | 4.63  | 1851.4 | 26  | 7.19  | 2876.4 | 2   | DMF        | 2.76          |
| 3   | 3.82  | 1529.1 | 15  | 6.50  | 2597.8 | 27  | 7.21  | 2884.9 | 3   | DMF        | [2.83 . 2.84] |
| 4   | 3.84  | 1535.4 | 16  | 6.50  | 2598.9 | 28  | 7.25  | 2899.5 |     |            |               |
| 5   | 3.90  | 1559.9 | 17  | 6.52  | 2605.8 | 29  | 7.26  | 2902.8 |     |            |               |
| 6   | 3.91  | 1563.9 | 18  | 6.53  | 2613.5 | 30  | 7.26  | 2904.6 |     |            |               |
| 7   | 3.93  | 1570.9 | 19  | 6.54  | 2614.6 | 31  | 8.05  | 3220.3 |     |            |               |
| 8   | 3.94  | 1575.3 | 20  | 7.13  | 2850.1 | 32  | 8.06  | 3221.8 |     |            |               |
| 9   | 4.59  | 1834.9 | 21  | 7.13  | 2851.2 | 33  | 8.07  | 3229.1 |     |            |               |
| 10  | 4.60  | 1839.3 | 22  | 7.14  | 2857.0 | 34  | 8.08  | 3230.6 |     |            |               |
| 11  | 4.60  | 1840.8 | 23  | 7.16  | 2865.1 | 35  | 8.63  | 3451.4 |     |            |               |
| 12  | 4.61  | 1845.2 | 24  | 7.17  | 2867.3 | 36  | 8.64  | 3457.3 |     |            |               |

Neptune\data1\kanal\vsr400\KY-2-23p

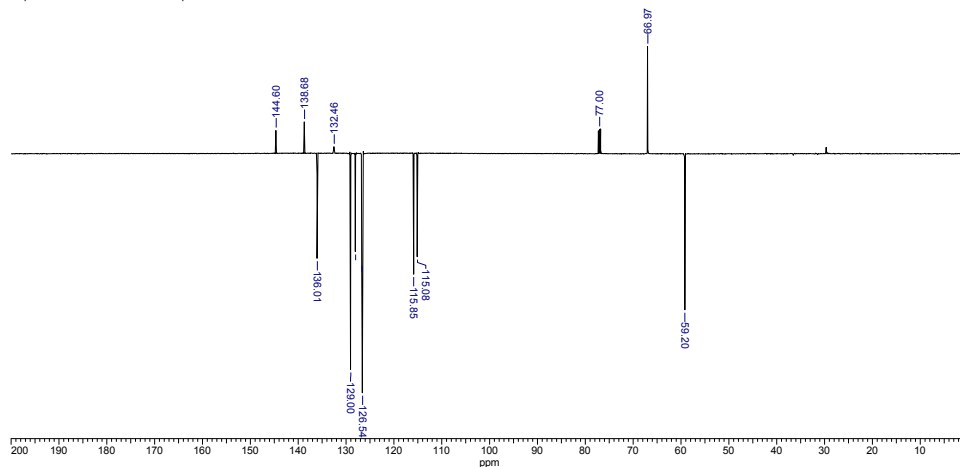

| No. | (ppm)  | (Hz)    |
|-----|--------|---------|
| 1   | 59.20  | 8934.7  |
| 2   | 66.97  | 10106.6 |
| 3   | 77.00  | 11620.8 |
| 4   | 115.08 | 17368.3 |
| 5   | 115.85 | 17483.9 |
| 6   | 126.54 | 19098.2 |
| 7   | 126.68 | 19119.1 |
| 8   | 128.00 | 19318.3 |
| 9   | 129.00 | 19469.0 |
| 10  | 132.46 | 19990.6 |
| 11  | 136.01 | 20526.6 |
| 12  | 138.68 | 20929.3 |
| 13  | 144.60 | 21822.9 |

Avance600/nmr\data\kanay\KY-2-23\_002001r

# 10-[(1*R*,2*S*)-1,2-Diphenyl-2-hydroxy]ethyl-benzo[*g*]pteridin-2,4(3*H*,10*H*)-dione (S9a)

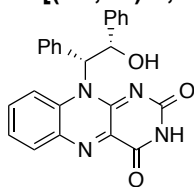

7/26/2013 8:04:12 PM

|                        |                                                                                           |                        |         |                      |                      |
|------------------------|-------------------------------------------------------------------------------------------|------------------------|---------|----------------------|----------------------|
| Acquisition Time (sec) | 2.7263                                                                                    | Comment                | 1H      | Date                 | 04 Mar 2013 16:09:20 |
| Date Stamp             | 04 Mar 2013 16:09:20                                                                      |                        |         |                      |                      |
| File Name              | C:\Users\Kana Yamamoto\Desktop\Chiral flavinium salts\sample data\NMR\KA-2-31\1\data\111r | Frequency (MHz)        | 600.20  |                      |                      |
| Nucleus                | 1H                                                                                        | Number of Transients   | 16      | Origin               | spect                |
| Owner                  | kenji                                                                                     | Points Count           | 65636   | Pulse Sequence       | zg30                 |
| SW(cyclical) (Hz)      | 12019.23                                                                                  | Solvent                | DMSO-d6 | Spectrum Offset (Hz) | 9703.6492            |
| Sweep Width (Hz)       | 12019.05                                                                                  | Temperature (degree C) | 22.150  | Receiver Gain        | 10.73                |
|                        |                                                                                           |                        |         | Spectrum Type        | STANDARD             |

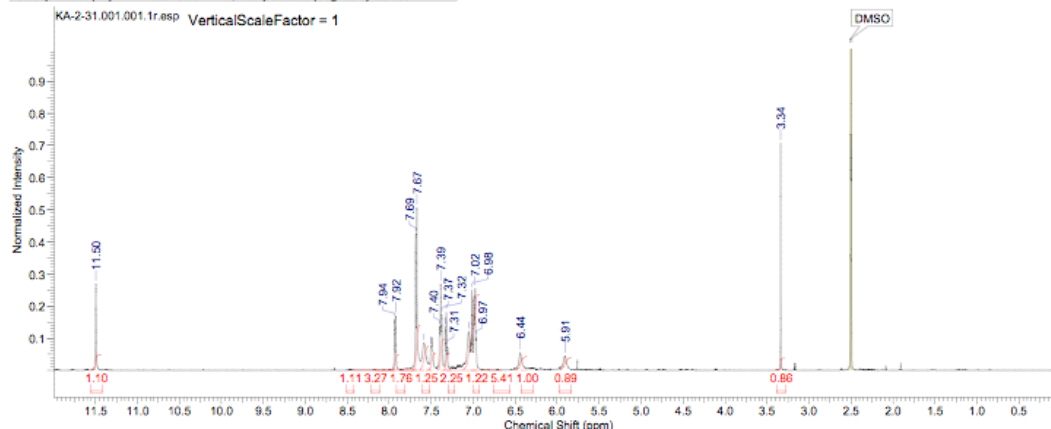

|                        |                      |                   |          |                        |                                                        |
|------------------------|----------------------|-------------------|----------|------------------------|--------------------------------------------------------|
| Acquisition Time (sec) | 0.9088               | Comment           | 13C      | Date                   | 04 Mar 2013 16:58:24                                   |
| Date Stamp             | 04 Mar 2013 16:58:24 |                   |          | File Name              | C:\Users\Kana Yamamoto\Desktop\NMR\KA-2-31\2\data\111r |
| Frequency (MHz)        | 150.92               | Nucleus           | 13C      | Number of Transients   | 918                                                    |
| Original Points Count  | 32768                | Owner             | kenji    | Points Count           | 32768                                                  |
| Receiver Gain          | 173.95               | SW(cyclical) (Hz) | 36057.89 | Solvent                | DMSO-d6                                                |
| Spectrum Type          | STANDARD             | Sweep Width (Hz)  | 36056.59 | Temperature (degree C) | 22.150                                                 |
|                        |                      |                   |          | Spectrum Offset (Hz)   | 15021.8535                                             |

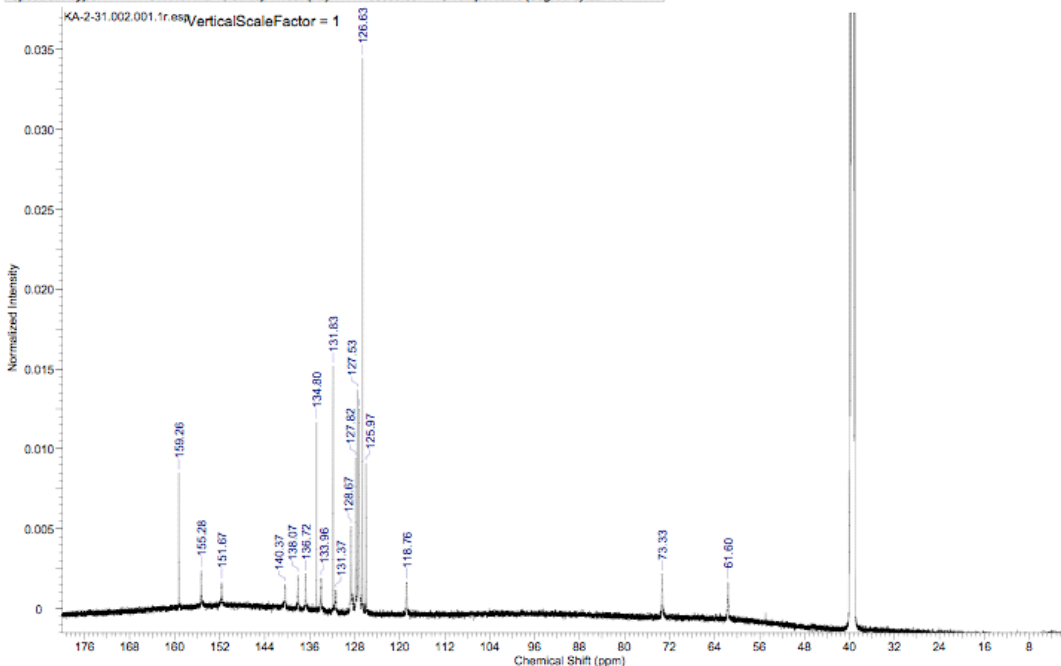

CN1C(=O)N2C(=O)N(Cc3ccccc3)[C@H](O)[C@@H](c4ccccc4)C2=N1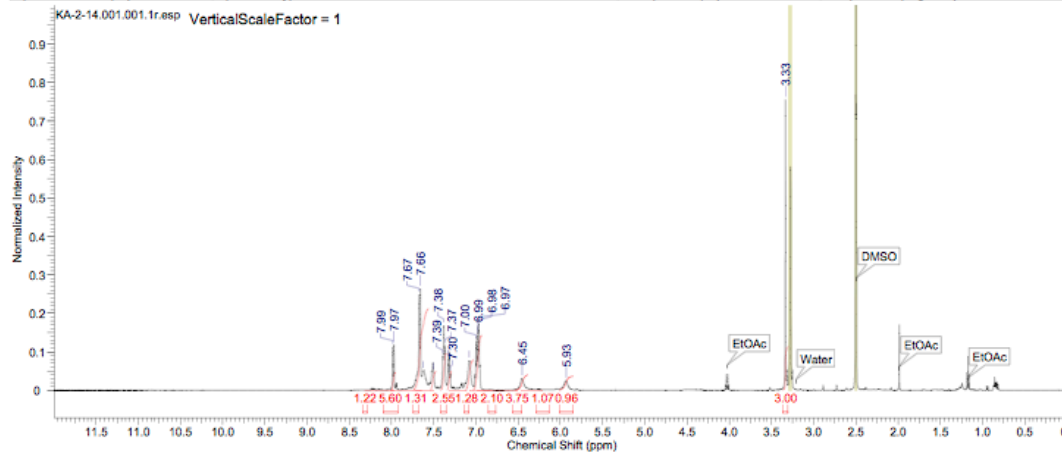

| No. | (ppm) | Value           | Absolute Value | Non-Negative Value |
|-----|-------|-----------------|----------------|--------------------|
| 1/3 | 30.49 | 3.363 000000000 | 1.49394860e+7  | 3.00000000         |
| 25  | 84.80 | 6.010 95807481  | 4.77104850e+6  | 0.95807481         |
| 36  | 38.44 | 6.331 06862336  | 5.32158100e+6  | 1.06862330         |
| 46  | 82.55 | 7.033 7506792   | 1.86777400e+7  | 0.75067925         |
| 57  | 33.23 | 7.122 10106421  | 1.04629400e+7  | 0.21106421         |
| 67  | 28.46 | 7.331 28428293  | 6.39822500e+6  | 1.28428293         |
| 77  | 35.28 | 7.422 54945183  | 1.26958330e+7  | 2.54951833         |
| 87  | 47.10 | 7.531 30715954  | 6.50943050e+6  | 0.30715954         |
| 97  | 56.65 | 7.735 6027236   | 2.79006400e+7  | 5.60272360         |
| 107 | 56.00 | 8.001 21683300  | 6.05862000e+6  | 1.21683300         |

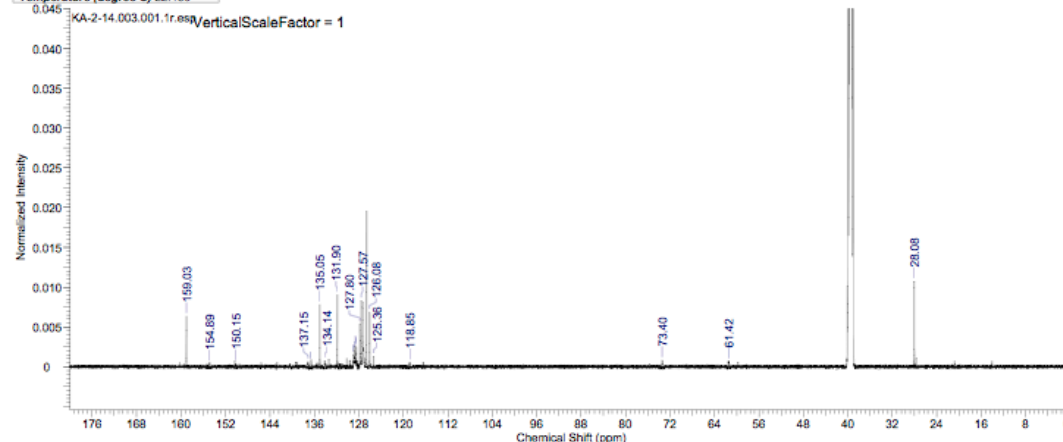

| No. | (ppm)  | (Hz)    | Height |
|-----|--------|---------|--------|-----|--------|---------|--------|-----|--------|---------|--------|-----|--------|---------|--------|
| 1   | 28.08  | 4237.4  | 0.0108 | 6   | 126.08 | 19027.8 | 0.0069 | 11  | 128.85 | 19446.0 | 0.0020 | 16  | 136.61 | 20619.9 | 0.0006 |
| 2   | 61.42  | 9269.5  | 0.0007 | 7   | 127.57 | 19253.4 | 0.0083 | 12  | 128.95 | 19461.4 | 0.0015 | 17  | 137.15 | 20698.2 | 0.0007 |
| 3   | 73.40  | 11077.5 | 0.0009 | 8   | 127.80 | 19287.5 | 0.0054 | 13  | 131.90 | 19905.9 | 0.0090 | 18  | 150.15 | 22661.3 | 0.0004 |
| 4   | 118.85 | 17936.2 | 0.0005 | 9   | 128.46 | 19386.6 | 0.0025 | 14  | 134.14 | 20243.8 | 0.0008 | 19  | 154.89 | 23376.6 | 0.0004 |
| 5   | 125.36 | 18618.9 | 0.0013 | 10  | 126.67 | 19419.6 | 0.0027 | 15  | 135.05 | 20382.4 | 0.0078 | 20  | 159.03 | 24001.6 | 0.0004 |

# 10-[(1*R*,2*R*)-1,2-Diphenyl-2-hydroxy]ethyl-benzo[*g*]pteridin-2,4(3*H*,10*H*)-dione (S10a)

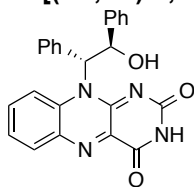

|                        |                                                                                           |                        |         |                      |                      |
|------------------------|-------------------------------------------------------------------------------------------|------------------------|---------|----------------------|----------------------|
| Acquisition Time (sec) | 2.7263                                                                                    | Comment                | 1H      | Date                 | 15 Mar 2013 13:10:24 |
| Date Stamp             | 15 Mar 2013 13:10:24                                                                      |                        |         |                      |                      |
| File Name              | C:\Users\Kana.Yamamoto\Desktop\Chiral flavinium salts\sample data\NMR\KA-2-43\1\data\111r | Frequency (MHz)        | 600.20  |                      |                      |
| Nucleus                | <sup>1</sup> H                                                                            | Number of Transients   | 16      | Origin               | spect                |
| Owner                  | kenji                                                                                     | Points Count           | 65536   | Pulse Sequence       | zg30                 |
| SW(cyclical) (Hz)      | 12019.23                                                                                  | Solvent                | DMSO-d6 | Receiver Gain        | 10.73                |
| Sweep Width (Hz)       | 12019.05                                                                                  | Temperature (degree C) | 22.148  | Spectrum Offset (Hz) | 3703.6492            |
|                        |                                                                                           |                        |         | Spectrum Type        | STANDARD             |

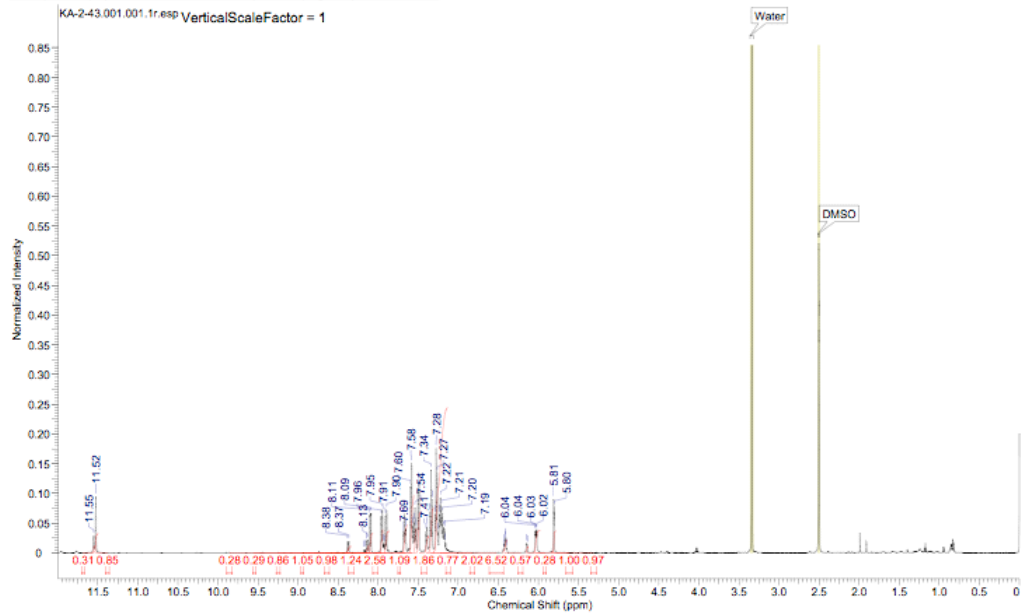

|                        |                                                                                           |                        |                 |                      |                      |
|------------------------|-------------------------------------------------------------------------------------------|------------------------|-----------------|----------------------|----------------------|
| Acquisition Time (sec) | 0.9088                                                                                    | Comment                | <sup>13</sup> C | Date                 | 15 Mar 2013 13:50:56 |
| Date Stamp             | 15 Mar 2013 13:50:56                                                                      |                        |                 |                      |                      |
| File Name              | C:\Users\Kana.Yamamoto\Desktop\Chiral flavinium salts\sample data\NMR\KA-2-43\2\data\111r | Frequency (MHz)        | 150.92          |                      |                      |
| Nucleus                | <sup>13</sup> C                                                                           | Number of Transients   | 777             | Origin               | spect                |
| Owner                  | kenji                                                                                     | Points Count           | 32768           | Pulse Sequence       | zgpg30               |
| SW(cyclical) (Hz)      | 36057.89                                                                                  | Solvent                | DMSO-d6         | Receiver Gain        | 173.95               |
| Sweep Width (Hz)       | 36056.59                                                                                  | Temperature (degree C) | 22.148          | Spectrum Offset (Hz) | 15021.8535           |
|                        |                                                                                           |                        |                 | Spectrum Type        | STANDARD             |

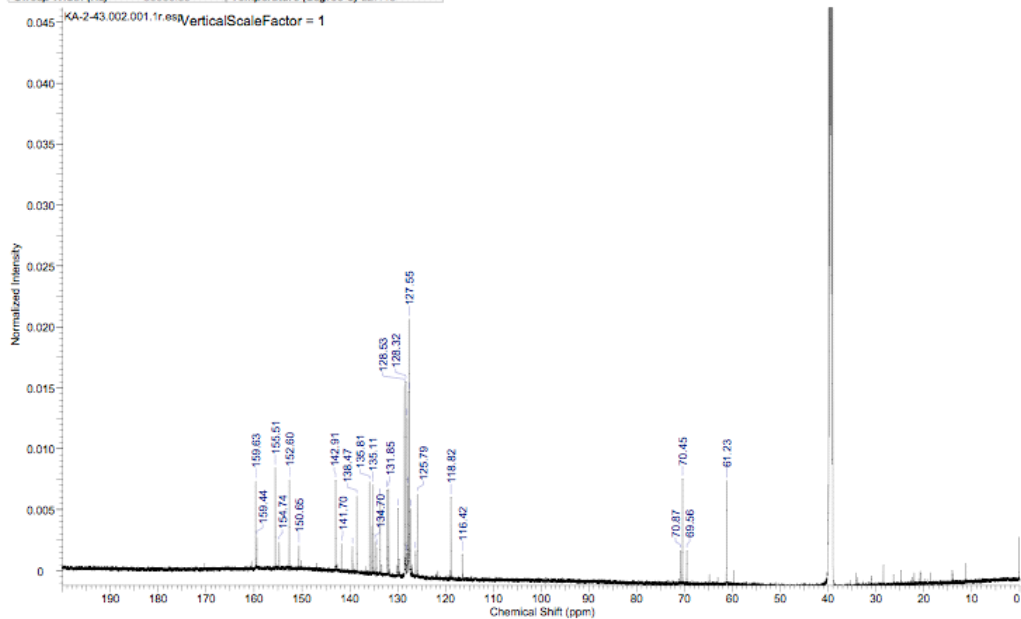

10-[(1*R*,2*R*)-1,2-diphenyl-2-hydroxy]ethyl-3-methyl-benzo[*g*]pteridin-2,4(3*H*,10*H*)-dione (S10b)

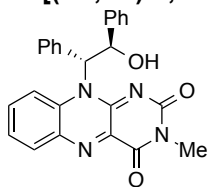

|                        |                                                                                           |                        |         |                      |                      |
|------------------------|-------------------------------------------------------------------------------------------|------------------------|---------|----------------------|----------------------|
| Acquisition Time (sec) | 2.7263                                                                                    | Comment                | 1H      | Date                 | 15 Mar 2013 13:10:24 |
| Date Stamp             | 15 Mar 2013 13:10:24                                                                      |                        |         |                      |                      |
| File Name              | C:\Users\Kana\Yamamoto\Desktop\Chiral flavinium salts\sample data\NMR\KA-2-43(1\data)\11r | Frequency (MHz)        | 600.20  |                      |                      |
| Nucleus                | <sup>1</sup> H                                                                            | Number of Transients   | 16      | Origin               | spect                |
| Owner                  | kenji                                                                                     | Points Count           | 65536   | Pulse Sequence       | zg30                 |
| SW(cyclical) (Hz)      | 12019.23                                                                                  | Solvent                | DMSO-d6 | Receiver Gain        | 10.73                |
| Sweep Width (Hz)       | 12019.05                                                                                  | Temperature (degree C) | 22.148  | Spectrum Offset (Hz) | 3703.6492            |
|                        |                                                                                           |                        |         | Spectrum Type        | STANDARD             |

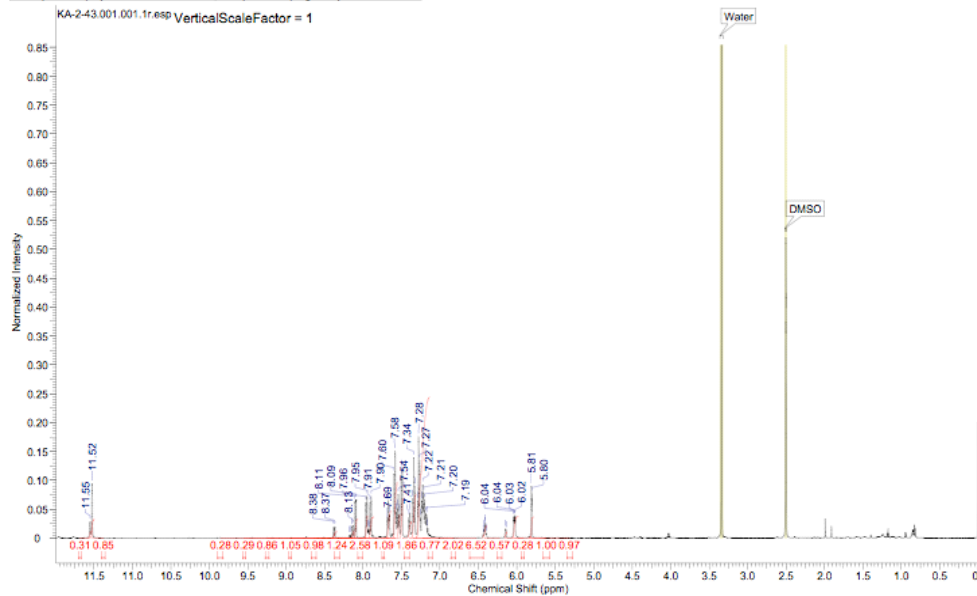

|                        |                      |                        |                 |                      |                                                        |
|------------------------|----------------------|------------------------|-----------------|----------------------|--------------------------------------------------------|
| Acquisition Time (sec) | 0.9088               | Comment                | <sup>13</sup> C | Date                 | 15 Mar 2013 13:50:56                                   |
| Date Stamp             | 15 Mar 2013 13:50:56 |                        |                 |                      |                                                        |
| Frequency (MHz)        | 150.92               | Nucleus                | <sup>13</sup> C | File Name            | C:\Users\Kana\Yamamoto\Desktop\NMR\KA-2-43(2\data)\11r |
| Original Points Count  | 32768                | Owner                  | kenji           | Number of Transients | 777                                                    |
| Receiver Gain          | 173.95               | SW(cyclical) (Hz)      | 38057.89        | Points Count         | 32768                                                  |
| Spectrum Type          | STANDARD             | Solvent                | DMSO-d6         | Pulse Sequence       | zgpg30                                                 |
|                        |                      | Temperature (degree C) | 22.148          | Spectrum Offset (Hz) | 15021.8535                                             |

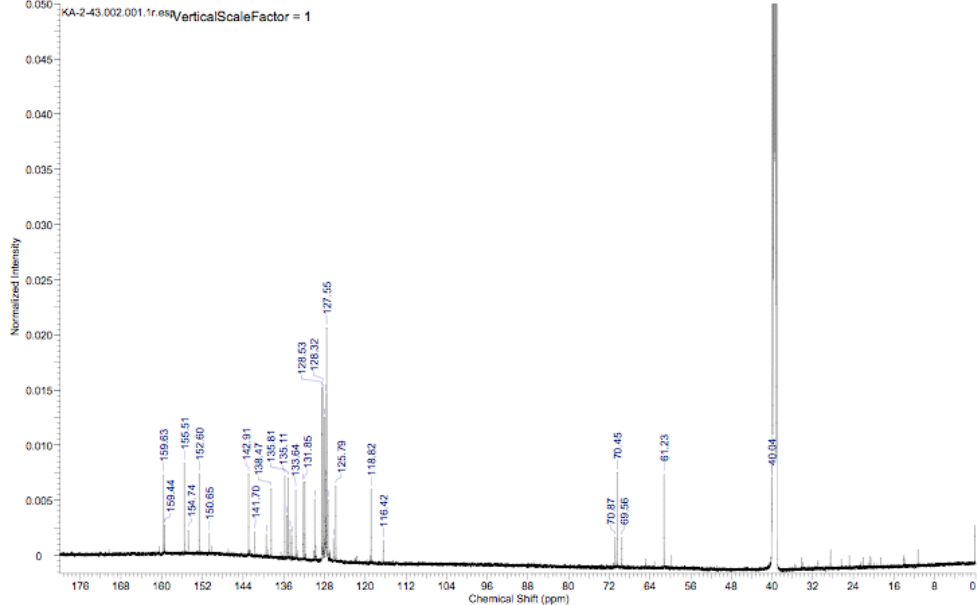

**10-[(1*S*)-1-Phenyl-2-hydroxy]ethyl-benzo[*g*]pteridin-2,4(3*H*,10*H*)-dione (S12a)**

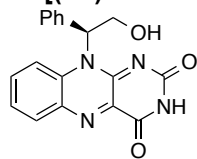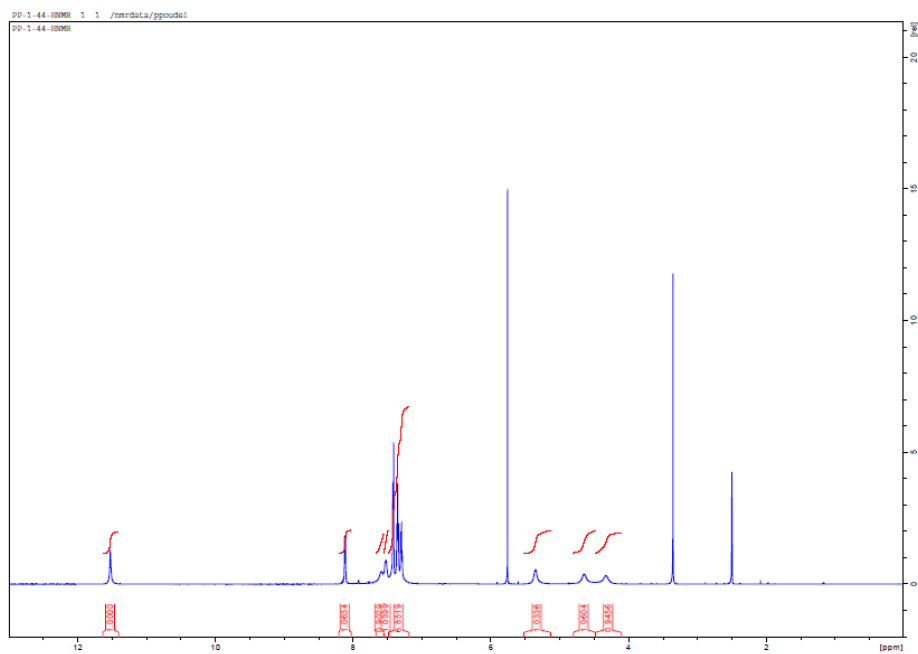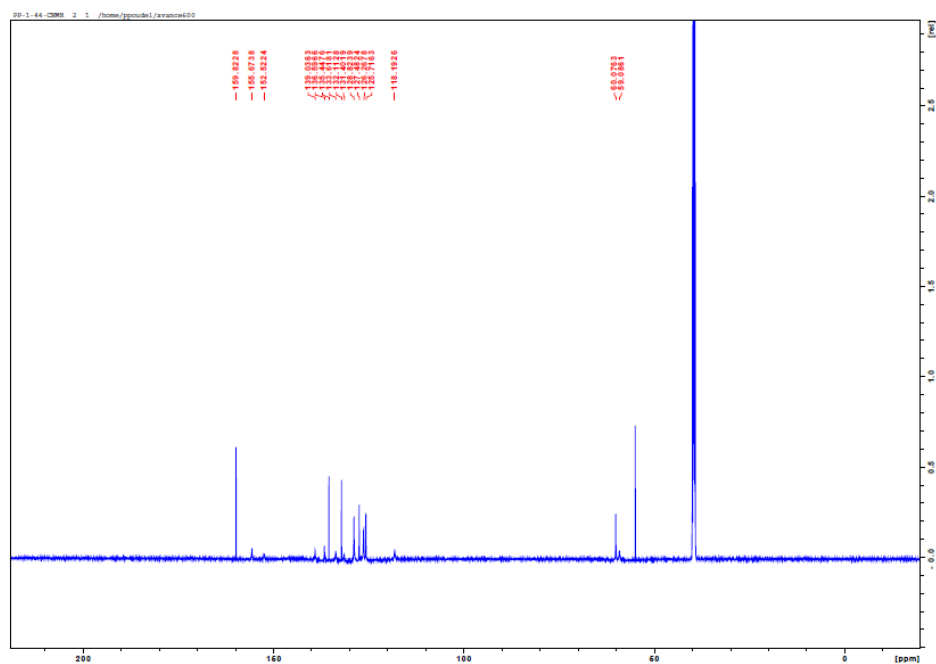



**(1*R*,2*R*)-1,2-Diphenyl-1,2-dihydro-4,6(3*H*,5*H*)-dioxo-benzo[*g*]imidazo[1,2-*i*,*j*]pteridin-12-ium chloride (3a)**

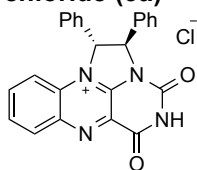

|                        |                      |                  |                                                                                     |                        |                      |
|------------------------|----------------------|------------------|-------------------------------------------------------------------------------------|------------------------|----------------------|
| Acquisition Time (sec) | 2.2283               | Comment          | 1H                                                                                  | Date                   | 05 Feb 2013 19:42:40 |
| Date Stamp             | 05 Feb 2013 19:42:40 | File Name        | D:\Yamamoto's group\Kiv-membrated ring flavin\Kaemlin\data\NM\BKA-1-57\2\data\1\11r | Frequency (MHz)        | 600.20               |
| Frequency (MHz)        | 600.20               | Nucleus          | 1H                                                                                  | Number of Transients   | 18                   |
| Original Points Count  | 32768                | Driver           | keru                                                                                | Points Count           | 85536                |
| Receiver Gain          | 10.73                | SW (cycles)      | 12019.23                                                                            | Solvent                | DMSO-d6              |
| Spectrum Type          | STANDARD             | Sweep Width (Hz) | 12019.05                                                                            | Temperature (degree C) | 22.052               |

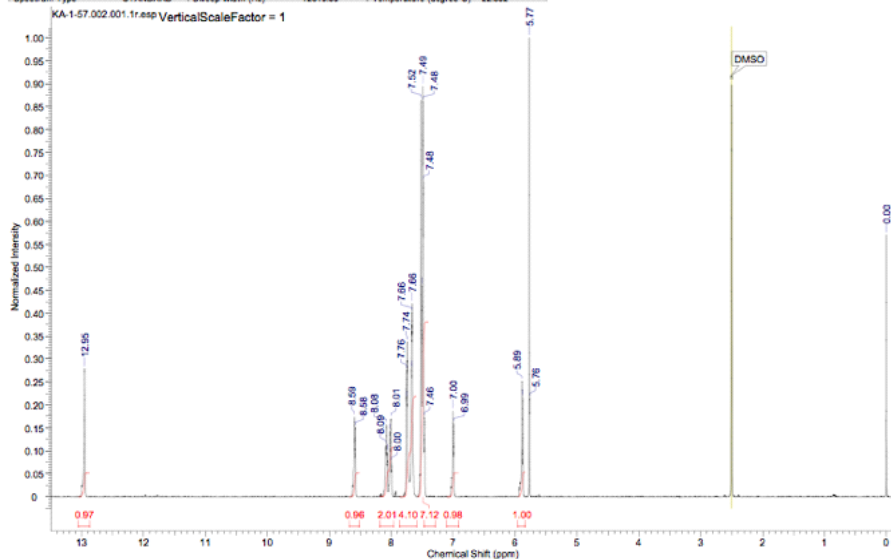

|                        |                      |                        |                                                                                           |                      |                      |
|------------------------|----------------------|------------------------|-------------------------------------------------------------------------------------------|----------------------|----------------------|
| Acquisition Time (sec) | 0.9088               | Comment                | C13                                                                                       | Date                 | 05 Feb 2013 19:29:52 |
| Date Stamp             | 05 Feb 2013 19:29:52 | File Name              | C:\Users\Kana.Yamamoto\Desktop\Chiral flavinium salts\sample data\NM\KA-1-57\1\pdata\111r | Frequency (MHz)      | 150.92               |
| Nucleus                | 13C                  | Number of Transients   | 256                                                                                       | Origin               | spect                |
| Owner                  | kenji                | Points Count           | 32768                                                                                     | Pulse Sequence       | zgpg30               |
| SW (cycles)            | 36057.69             | Solvent                | DMSO-d6                                                                                   | Spectrum Offset (Hz) | 15020.7539           |
| Sweep Width (Hz)       | 36056.59             | Temperature (degree C) | 22.050                                                                                    | Spectrum Type        | STANDARD             |

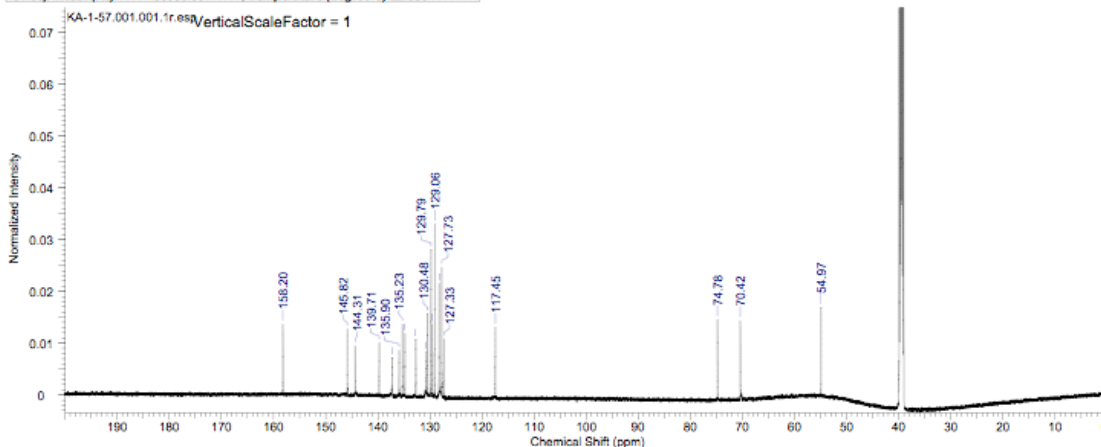

| No. | (ppm)  | (Hz)    | Height |
|-----|--------|---------|--------|-----|--------|---------|--------|-----|--------|---------|--------|-----|--------|---------|--------|
| 1   | 54.97  | 8295.7  | 0.0169 | 7   | 128.22 | 19351.4 | 0.0215 | 13  | 132.71 | 20028.1 | 0.0108 | 19  | 144.31 | 21779.9 | 0.0094 |
| 2   | 70.42  | 10627.4 | 0.0144 | 8   | 129.06 | 19477.9 | 0.0330 | 14  | 134.77 | 20339.5 | 0.0118 | 20  | 145.82 | 22007.7 | 0.0127 |
| 3   | 74.78  | 11286.6 | 0.0145 | 9   | 129.53 | 19549.4 | 0.0137 | 15  | 135.23 | 20408.6 | 0.0136 | 21  | 158.20 | 23875.1 | 0.0138 |
| 4   | 117.45 | 17726.1 | 0.0131 | 10  | 129.79 | 19587.9 | 0.0281 | 16  | 135.90 | 20510.1 | 0.0086 |     |        |         |        |
| 5   | 127.33 | 19216.0 | 0.0109 | 11  | 130.48 | 19692.5 | 0.0157 | 17  | 137.23 | 20711.4 | 0.0073 |     |        |         |        |
| 6   | 127.73 | 19276.5 | 0.0247 | 12  | 130.69 | 19723.3 | 0.0083 | 18  | 139.71 | 21085.6 | 0.0101 |     |        |         |        |



**(1*R*,2*R*)-1,2-Diphenyl-3-methyl-1,2-dihydro-4,6(3*H*,5*H*)-dioxo-benzo[*g*]imidazo[1,2-*i,j*]pteridin-12-ium chloride (3b)**

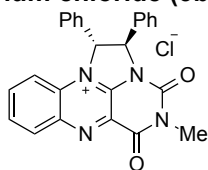

|                        |                      |                   |          |                        |                                                        |
|------------------------|----------------------|-------------------|----------|------------------------|--------------------------------------------------------|
| Acquisition Time (sec) | 2.7263               | Comment           | 1H       | Date                   | 23 Mar 2013 17:54:08                                   |
| Date Stamp             | 23 Mar 2013 17:54:08 |                   |          | File Name              | C:\Users\Kana Yamamoto\Desktop\NMR\KA-2-52(2\data)\11r |
| Frequency (MHz)        | 600.20               | Nucleus           | 1H       | Number of Transients   | 16                                                     |
| Original Points Count  | 32768                | Owner             | kenji    | Points Count           | 65536                                                  |
| Receiver Gain          | 10.73                | SW(cyclical) (Hz) | 12019.23 | Solvent                | DMSO-d6                                                |
| Spectrum Type          | STANDARD             | Sweep Width (Hz)  | 12019.05 | Temperature (degree C) | 22.146                                                 |
|                        |                      |                   |          | Origin                 | spect                                                  |
|                        |                      |                   |          | Pulse Sequence         | zg30                                                   |
|                        |                      |                   |          | Spectrum Offset (Hz)   | 3704.5662                                              |

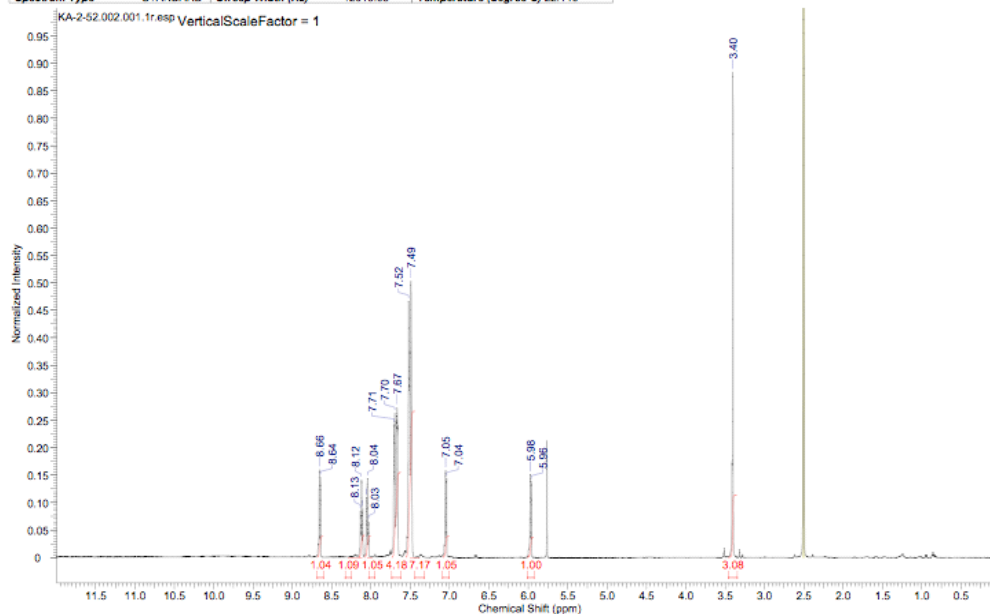

7/27/2013 8:29:12 PM

|                        |                      |                   |          |                        |                                                        |
|------------------------|----------------------|-------------------|----------|------------------------|--------------------------------------------------------|
| Acquisition Time (sec) | 0.9088               | Comment           | 13C      | Date                   | 23 Mar 2013 18:09:04                                   |
| Date Stamp             | 23 Mar 2013 18:09:04 |                   |          | File Name              | C:\Users\Kana Yamamoto\Desktop\NMR\KA-2-52(3\data)\11r |
| Frequency (MHz)        | 150.92               | Nucleus           | 13C      | Number of Transients   | 256                                                    |
| Original Points Count  | 32768                | Owner             | kenji    | Points Count           | 32768                                                  |
| Receiver Gain          | 173.95               | SW(cyclical) (Hz) | 36057.89 | Solvent                | DMSO-d6                                                |
| Spectrum Type          | STANDARD             | Sweep Width (Hz)  | 36056.59 | Temperature (degree C) | 22.147                                                 |
|                        |                      |                   |          | Origin                 | spect                                                  |
|                        |                      |                   |          | Pulse Sequence         | zgpg30                                                 |
|                        |                      |                   |          | Spectrum Offset (Hz)   | 15021.8535                                             |

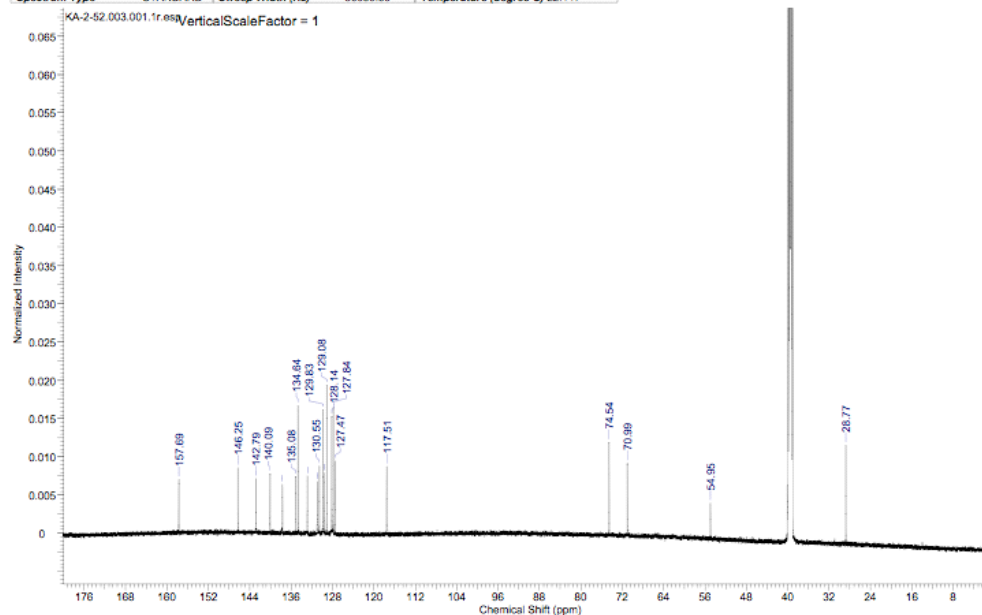

O=C1NC(=O)N2C(=O)N(C3C(C(=O)N2)C3)c4ccccc14.[Cl-]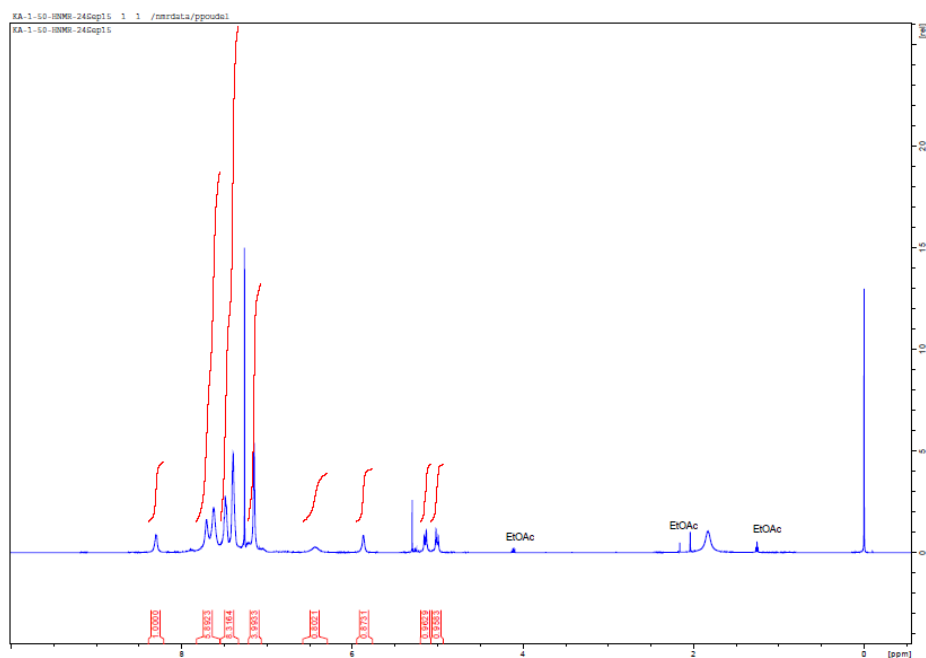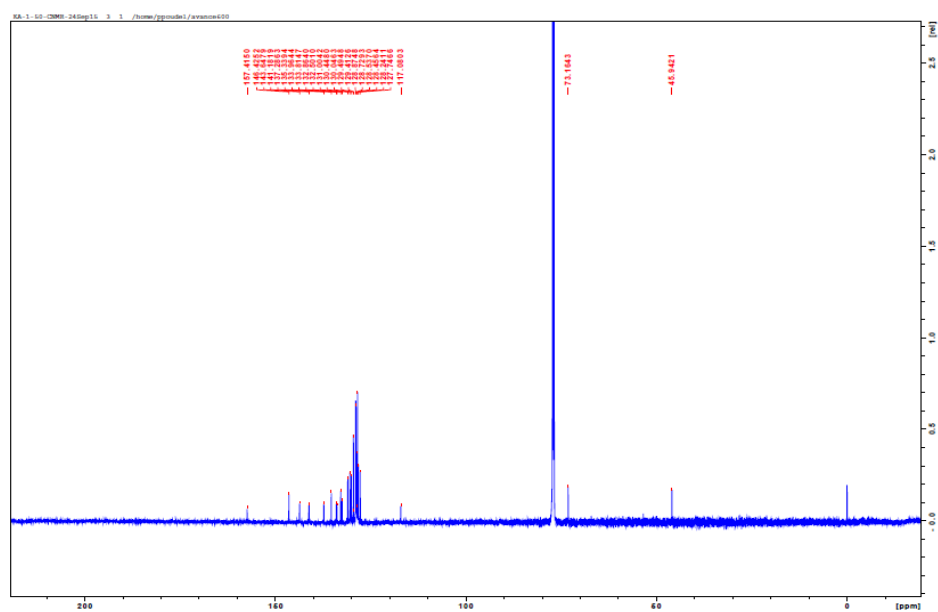

**(1*R*,2*S*)-1,2-Diphenyl-1,2-dihydro-4,6(3*H*,5*H*)-dioxo-benzo[*g*]imidazo[1,2-*i*,*j*]pteridin-12-ium chloride (4a)**

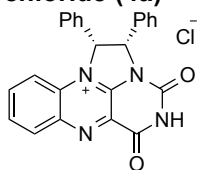

|                        |                      |                   |          |                        |                                                                         |
|------------------------|----------------------|-------------------|----------|------------------------|-------------------------------------------------------------------------|
| Acquisition Time (sec) | 0.9088               | Comment           | 13C      | Date                   | 17 Feb 2013 18:53:36                                                    |
| Date Stamp             | 17 Feb 2013 18:53:36 |                   |          | File Name              | C:\Users\Kana Yamamoto\Desktop\NMR\KA-2-10 washed with CH2Cl2\data\111r |
| Frequency (MHz)        | 150.92               | Nucleus           | 13C      | Number of Transients   | 256                                                                     |
| Original Points Count  | 32768                | Owner             | kerji    | Points Count           | 32768                                                                   |
| Receiver Gain          | 173.95               | SW(cyclical) (Hz) | 36057.69 | Solvent                | DMSO-d6                                                                 |
| Spectrum Type          | STANDARD             | Sweep Width (Hz)  | 36056.59 | Temperature (degree C) | 22.052                                                                  |

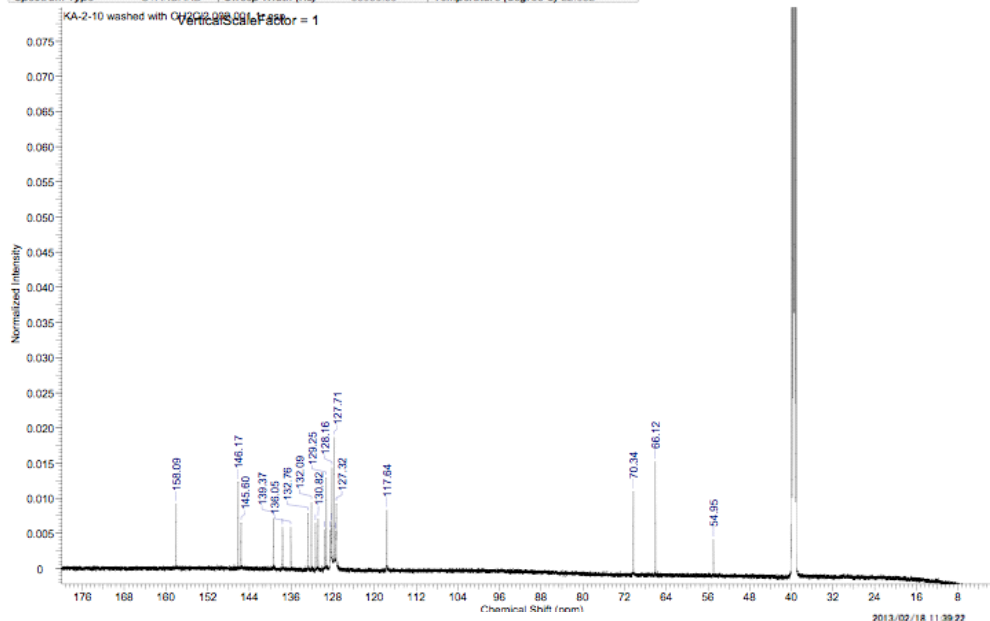

|                        |                      |                   |          |                        |                                                                                                   |
|------------------------|----------------------|-------------------|----------|------------------------|---------------------------------------------------------------------------------------------------|
| Acquisition Time (sec) | 2.7263               | Comment           | 1H       | Date                   | 17 Feb 2013 18:38:40                                                                              |
| Date Stamp             | 17 Feb 2013 18:38:40 |                   |          | File Name              | D:\Yamamoto's group\Five-membered ring fluor\sample\data\NMR\KA-2-10 washed with CH2Cl2\data\111r |
| Frequency (MHz)        | 600.22               | Nucleus           | 1H       | Number of Transients   | 16                                                                                                |
| Original Points Count  | 32768                | Owner             | kerji    | Points Count           | 65536                                                                                             |
| Receiver Gain          | 8.93                 | SW(cyclical) (Hz) | 12019.23 | Solvent                | DMSO-d6                                                                                           |
| Spectrum Type          | STANDARD             | Sweep Width (Hz)  | 12019.05 | Temperature (degree C) | 22.048                                                                                            |

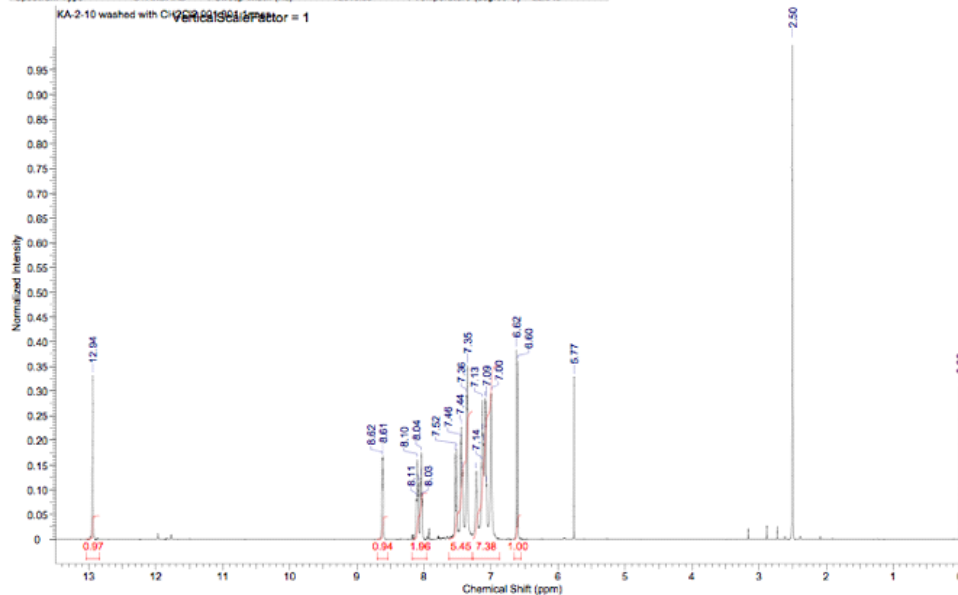

**(1*R*,2*S*)-1,2-Diphenyl-3-methyl-1,2-dihydro-4,6(3*H*,5*H*)-dioxo-benzo[*g*]imidazo[1,2-*i*,*j*]pteridin-12-ium chloride (4b)**

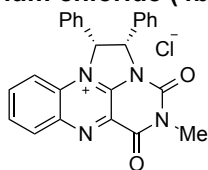

|                        |                      |                   |          |                        |                                                        |
|------------------------|----------------------|-------------------|----------|------------------------|--------------------------------------------------------|
| Acquisition Time (sec) | 0.9088               | Comment           | 13C      | Date                   | 19 Mar 2013 00:03:12                                   |
| Date Stamp             | 19 Mar 2013 00:03:12 |                   |          | File Name              | C:\Users\Kana Yamamoto\Desktop\NMR\KA-2-48\2\data\1\1r |
| Frequency (MHz)        | 150.92               | Nucleus           | 13C      | Number of Transients   | 756                                                    |
| Original Points Count  | 32768                | Owner             | kenji    | Points Count           | 32768                                                  |
| Receiver Gain          | 173.95               | SW(cyclical) (Hz) | 36057.69 | Solvent                | DMSO-d6                                                |
| Spectrum Type          | STANDARD             | Sweep Width (Hz)  | 36056.59 | Temperature (degree C) | 22.152                                                 |
|                        |                      |                   |          | Spectrum Offset (Hz)   | 15021.8535                                             |

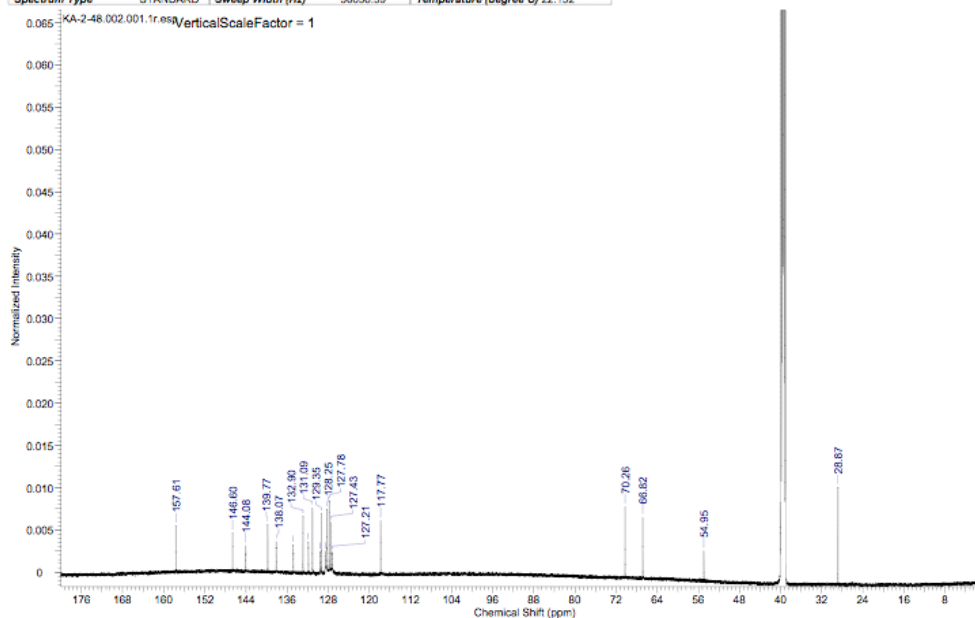

|                        |                      |                   |          |                        |                                                        |
|------------------------|----------------------|-------------------|----------|------------------------|--------------------------------------------------------|
| Acquisition Time (sec) | 2.7263               | Comment           | 1H       | Date                   | 18 Mar 2013 23:22:40                                   |
| Date Stamp             | 18 Mar 2013 23:22:40 |                   |          | File Name              | C:\Users\Kana Yamamoto\Desktop\NMR\KA-2-48\1\data\1\1r |
| Frequency (MHz)        | 600.20               | Nucleus           | 1H       | Number of Transients   | 16                                                     |
| Original Points Count  | 32768                | Owner             | kenji    | Points Count           | 65536                                                  |
| Receiver Gain          | 12.09                | SW(cyclical) (Hz) | 12019.23 | Solvent                | DMSO-d6                                                |
| Spectrum Type          | STANDARD             | Sweep Width (Hz)  | 12019.05 | Temperature (degree C) | 22.152                                                 |
|                        |                      |                   |          | Spectrum Offset (Hz)   | 3704.1992                                              |

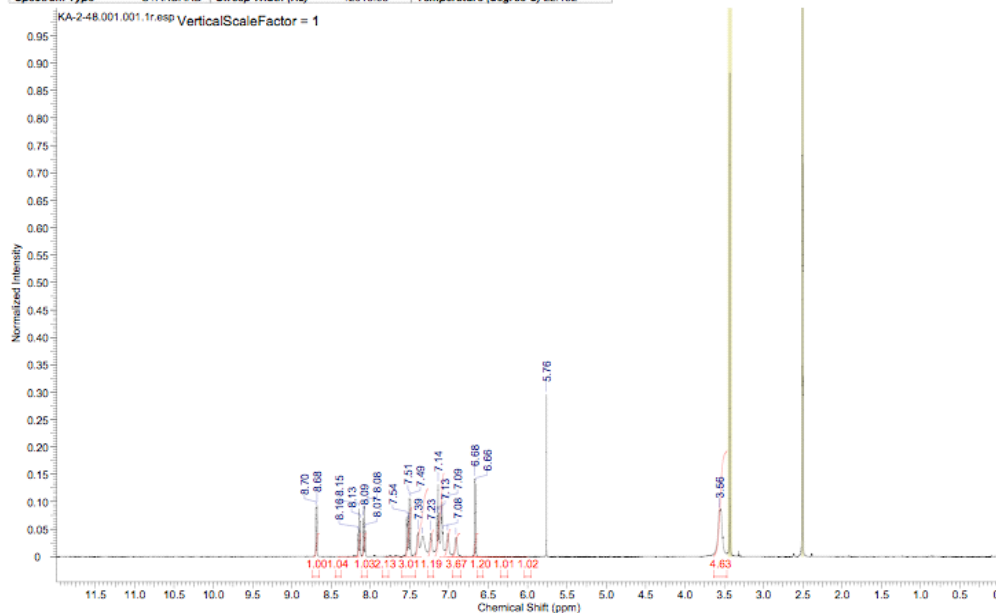

**(1*S*,2*S*)-1,2-Diphenyl-1,2-dihydro-4,6(3*H*,5*H*)-dioxo-benzo[*g*]imidazo[1,2-*i*,*j*]pteridin-12-ium chloride (5a)**

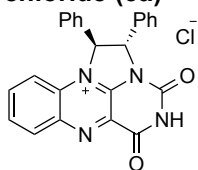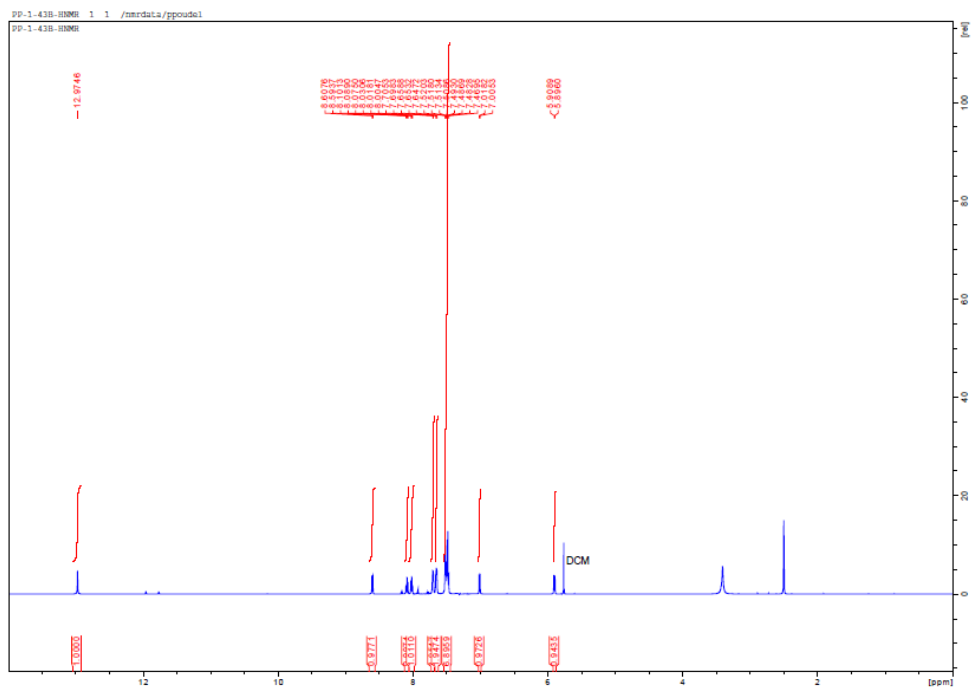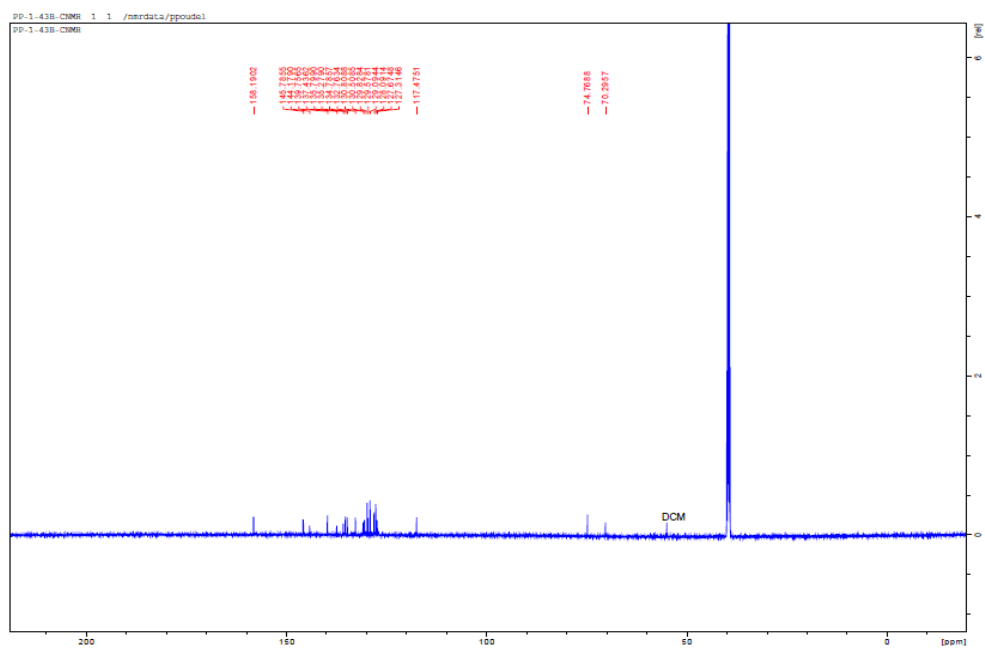

3-Phenylcyclobutanone (10)

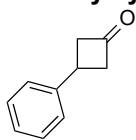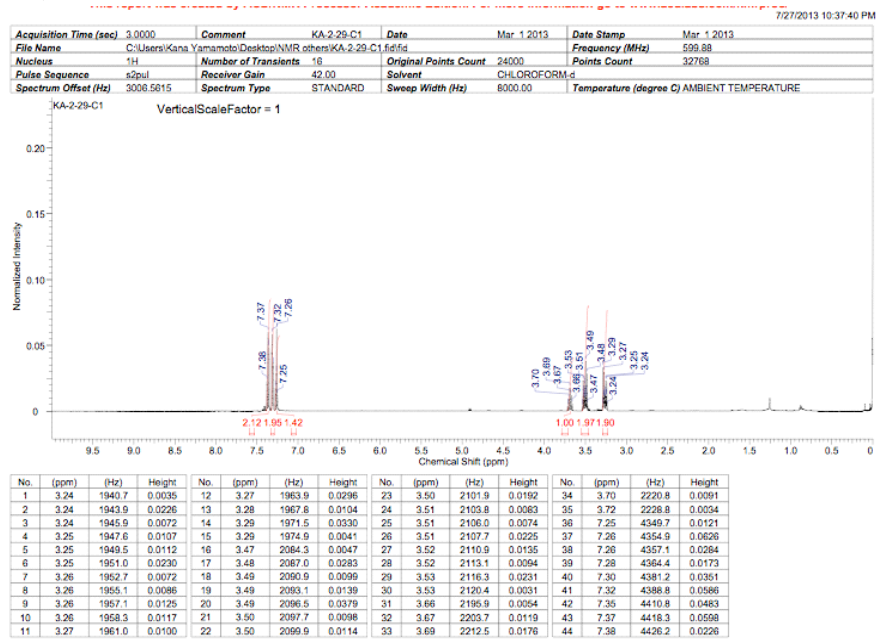

# 3-(1-naphthyl)cyclobutanone (11)

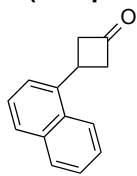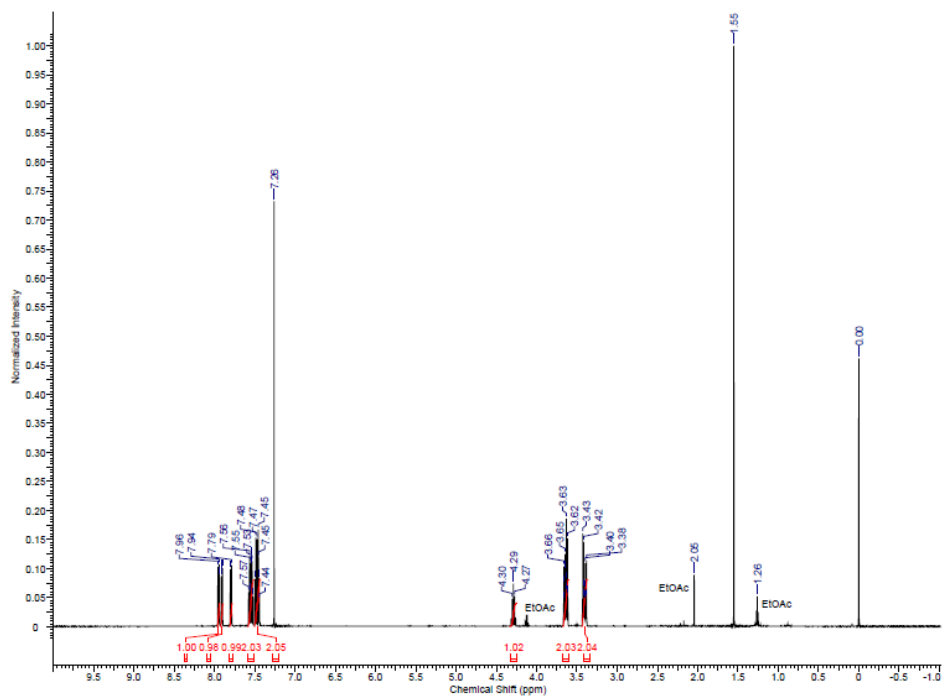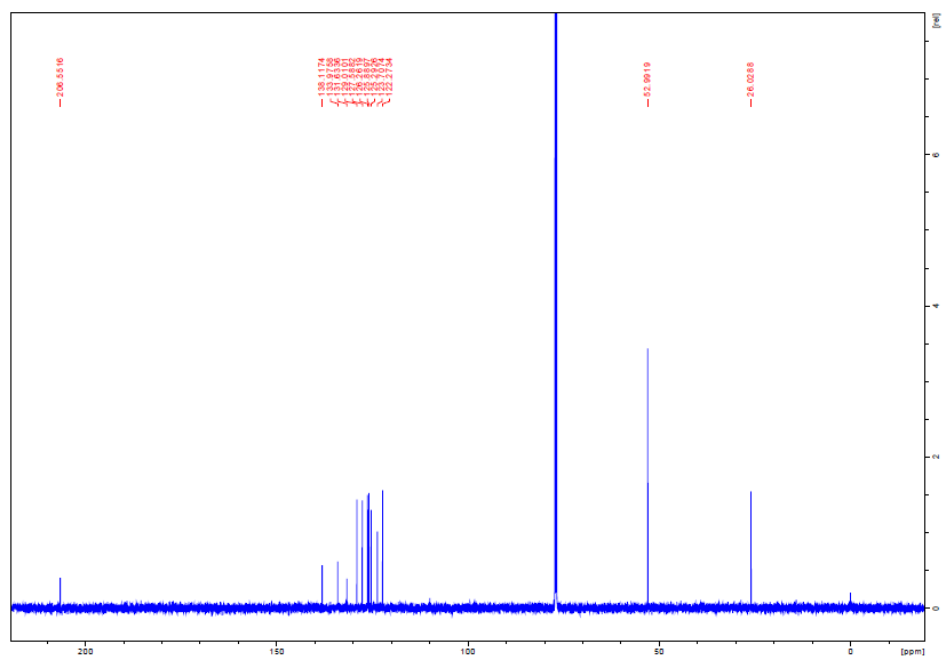

# 3-(Benzyloxymethyl)cyclobutanone (12)

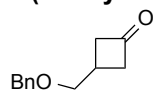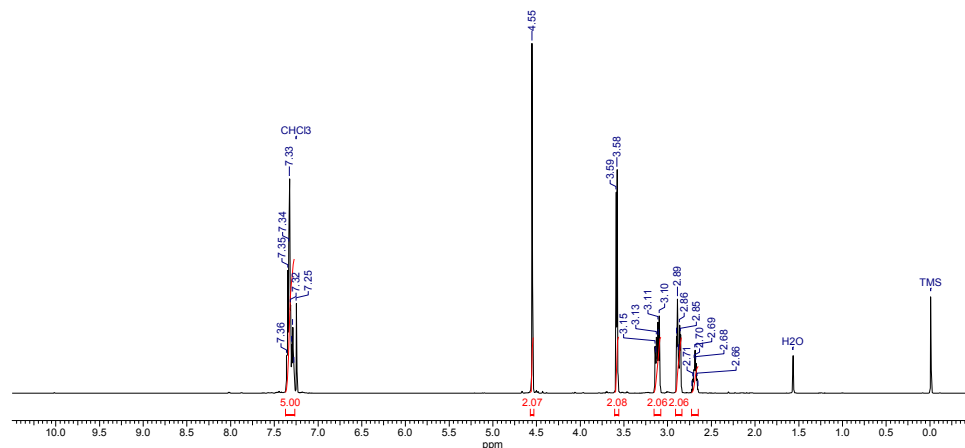

| No. | (ppm) | No. | (ppm) | No. | (ppm) | No. | Annotation        | (ppm) |
|-----|-------|-----|-------|-----|-------|-----|-------------------|-------|
| 1   | 2.65  | 16  | 2.88  | 31  | 3.15  | 1   | TMS               | -0.01 |
| 2   | 2.66  | 17  | 2.88  | 32  | 3.58  | 2   | H <sub>2</sub> O  | 1.57  |
| 3   | 2.67  | 18  | 2.89  | 33  | 3.59  | 3   | CHCl <sub>3</sub> | 7.25  |

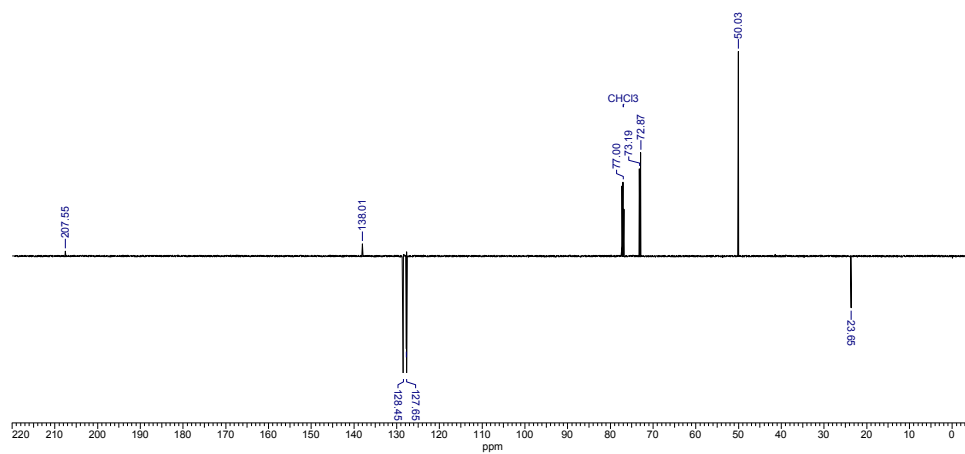

| No. | (ppm)  | No. | Annotation        | (ppm) |
|-----|--------|-----|-------------------|-------|
| 1   | 23.85  | 1   | CHCl <sub>3</sub> | 77.00 |
| 2   | 50.03  |     |                   |       |
| 3   | 72.87  |     |                   |       |
| 4   | 73.19  |     |                   |       |
| 5   | 77.00  |     |                   |       |
| 6   | 127.65 |     |                   |       |
| 7   | 127.76 |     |                   |       |
| 8   | 128.45 |     |                   |       |
| 9   | 138.01 |     |                   |       |
| 10  | 207.55 |     |                   |       |



# Benzyl-3-oxocyclobutanoate (13)

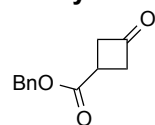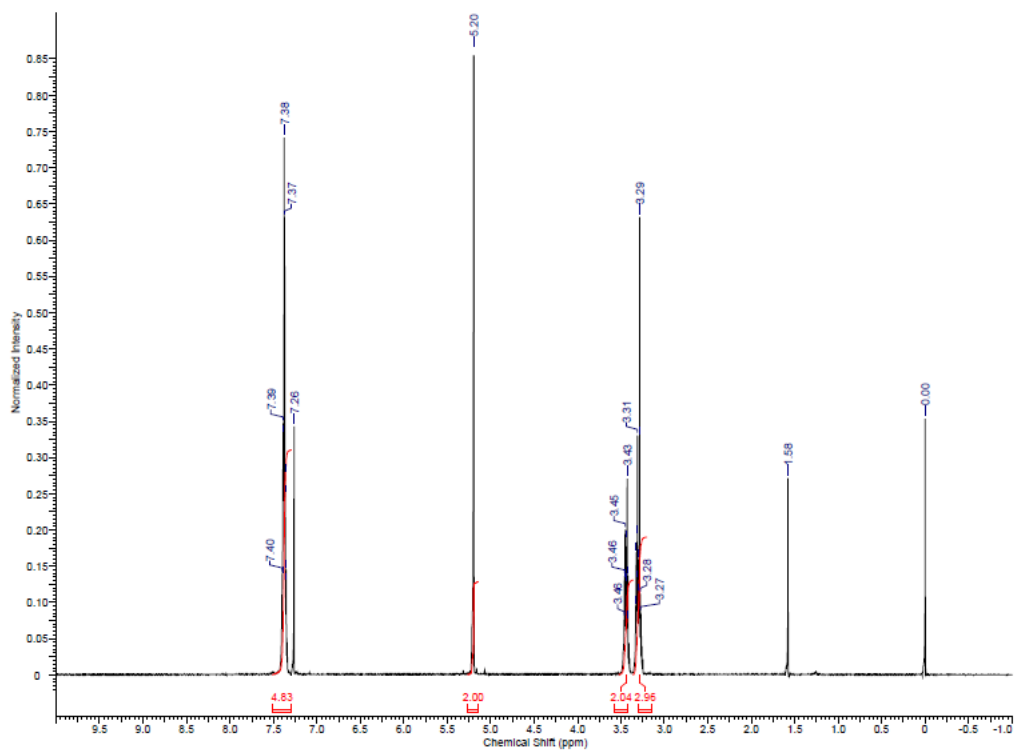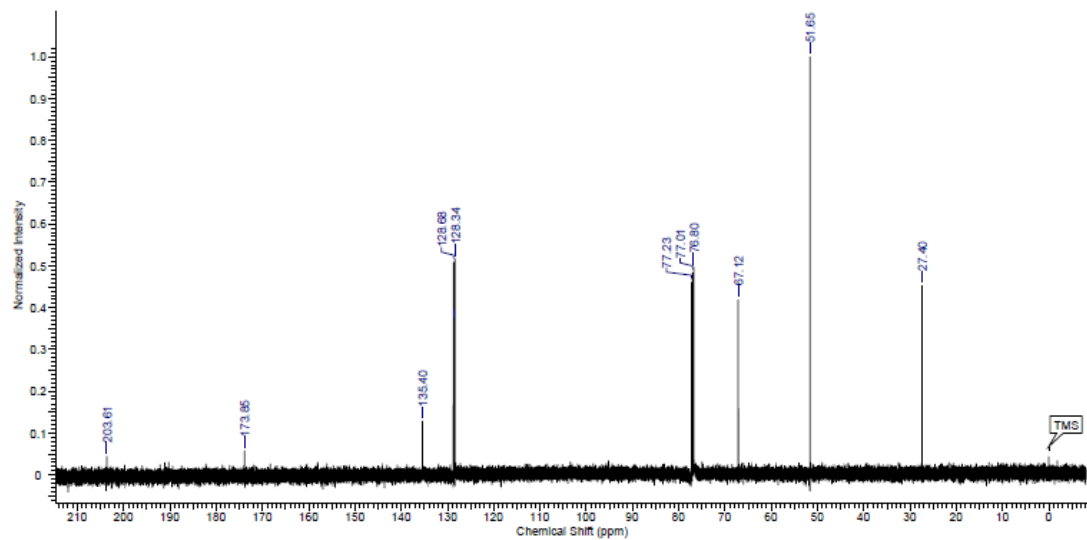

### 3-cyclohexylcyclobutanone (15)

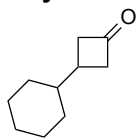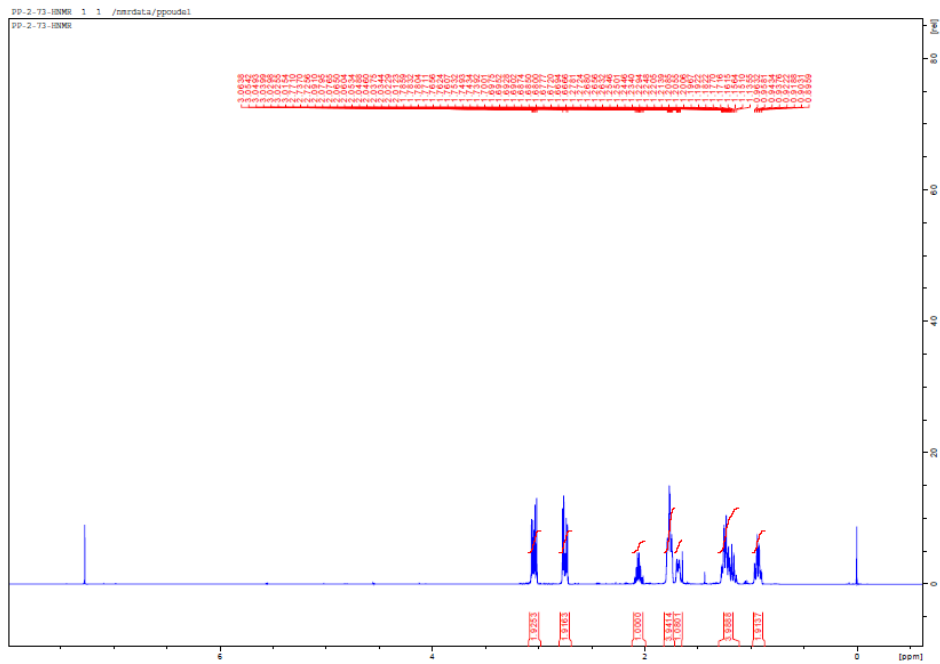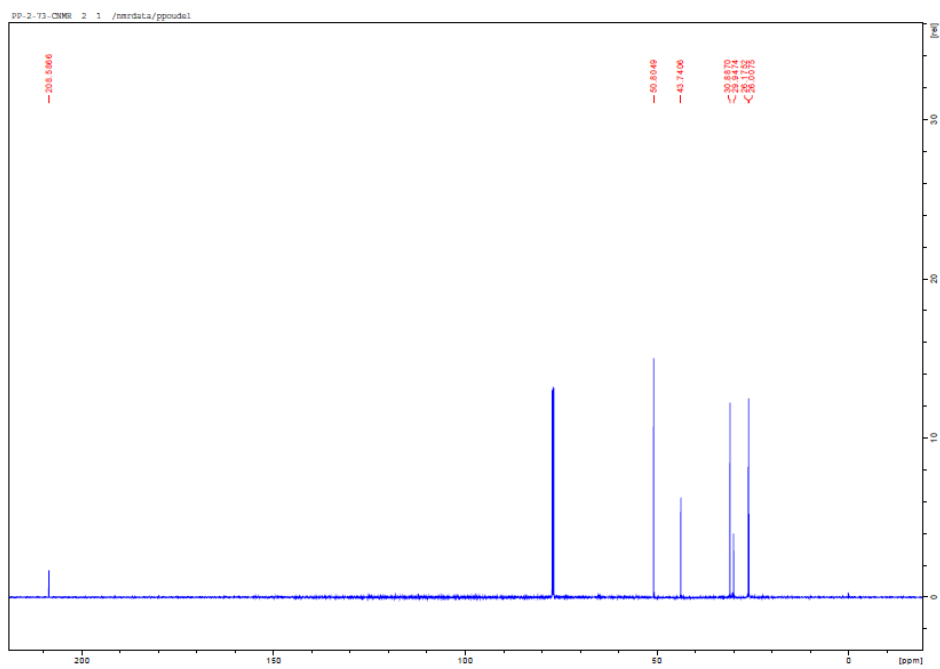

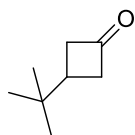

**3-*t*-butylclobutan-1-one**

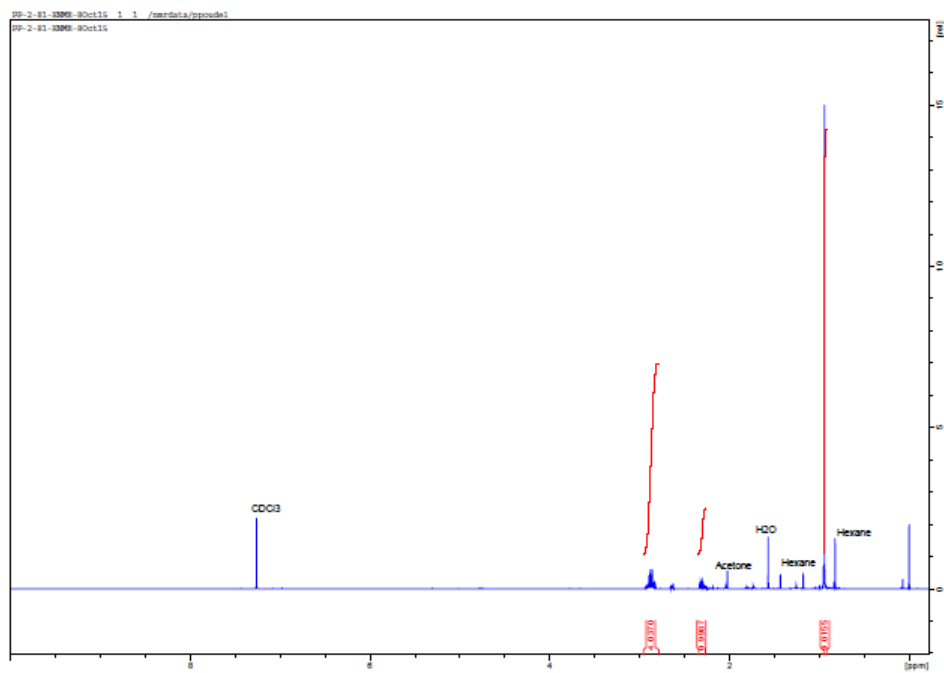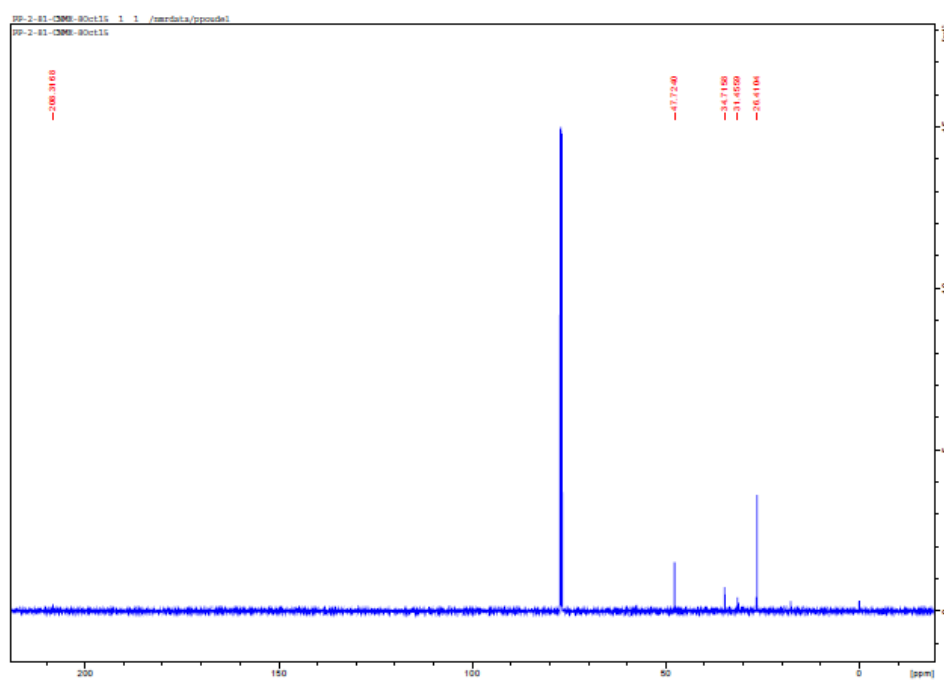

**4-phenyldihydrofuran-2(3*H*)-one**

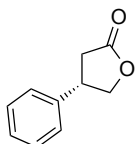

7/27/2013 10:41:57 PM

|                        |                                                          |                      |            |                       |              |                        |                     |
|------------------------|----------------------------------------------------------|----------------------|------------|-----------------------|--------------|------------------------|---------------------|
| Acquisition Time (sec) | 2.5001                                                   | Comment              | KA-2-55-C2 | Date                  | Mar 27 2013  | Date Stamp             | Mar 27 2013         |
| File Name              | C:\Users\Kana.Yamamoto\Desktop\NMR others\KA-2-55-C2.fid |                      |            |                       |              | Frequency (MHz)        | 199.96              |
| Nucleus                | <sup>1</sup> H                                           | Number of Transients | 32         | Original Points Count | 7501         | Points Count           | 8192                |
| Pulse Sequence         | s2pul                                                    | Receiver Gain        | 22.00      | Solvent               | CHLOROFORM-d |                        |                     |
| Spectrum Offset (Hz)   | 1000.1811                                                | Spectrum Type        | STANDARD   | Sweep Width (Hz)      | 3000.30      | Temperature (degree C) | AMBIENT TEMPERATURE |

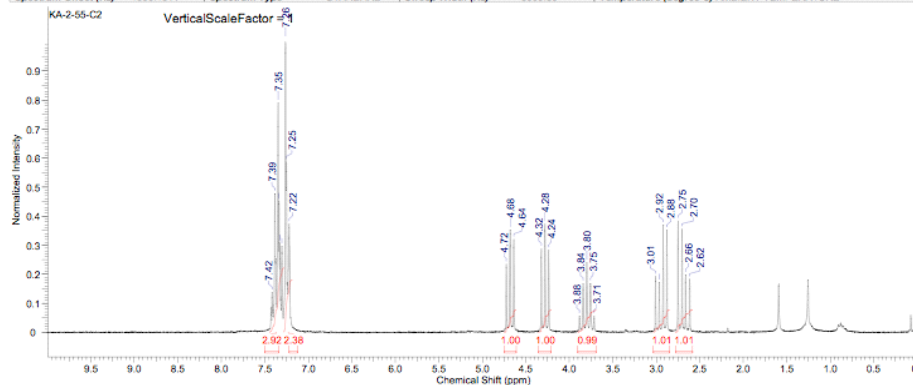

| No. | (ppm) | (Hz)  | Height | No. | (ppm) | (Hz)  | Height | No. | (ppm) | (Hz)   | Height | No. | (ppm) | (Hz)   | Height |
|-----|-------|-------|--------|-----|-------|-------|--------|-----|-------|--------|--------|-----|-------|--------|--------|
| 1   | 2.62  | 523.1 | 0.1829 | 8   | 3.01  | 601.5 | 0.1925 | 15  | 4.28  | 855.7  | 0.3729 | 22  | 7.26  | 1452.3 | 1.0000 |
| 2   | 2.66  | 532.2 | 0.1983 | 9   | 3.71  | 742.8 | 0.0575 | 16  | 4.32  | 864.1  | 0.2878 | 23  | 7.30  | 1460.4 | 0.2973 |
| 3   | 2.70  | 540.6 | 0.3553 | 10  | 3.75  | 750.9 | 0.1689 | 17  | 4.64  | 927.5  | 0.3204 | 24  | 7.33  | 1465.5 | 0.3077 |
| 4   | 2.75  | 549.8 | 0.3847 | 11  | 3.80  | 759.3 | 0.2412 | 18  | 4.68  | 935.5  | 0.3538 | 25  | 7.34  | 1467.4 | 0.4510 |
| 5   | 2.88  | 575.4 | 0.3530 | 12  | 3.84  | 767.7 | 0.1682 | 19  | 4.72  | 944.3  | 0.2350 | 26  | 7.35  | 1469.2 | 0.7906 |
| 6   | 2.92  | 584.2 | 0.3697 | 13  | 3.88  | 776.2 | 0.0581 | 20  | 7.22  | 1443.9 | 0.3731 | 27  | 7.39  | 1476.9 | 0.4785 |
| 7   | 2.97  | 593.0 | 0.1729 | 14  | 4.24  | 847.2 | 0.2835 | 21  | 7.25  | 1450.2 | 0.5877 | 28  | 7.42  | 1483.1 | 0.1381 |

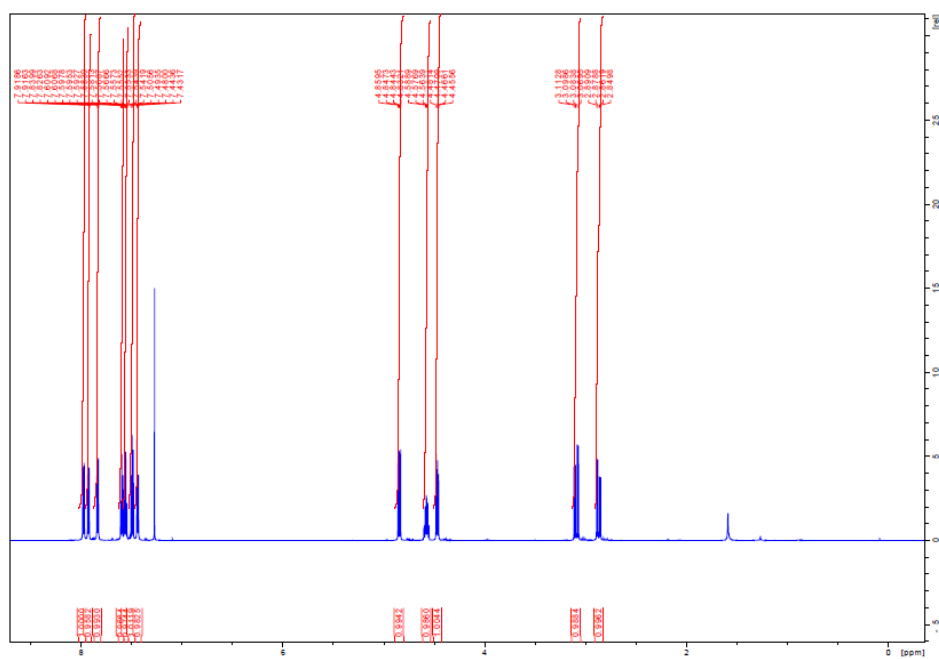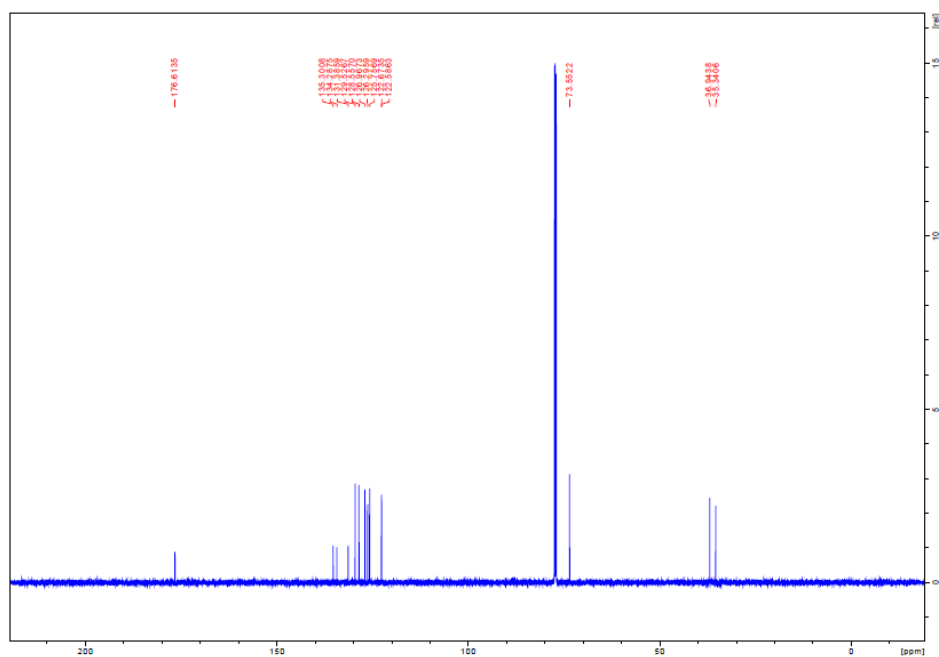

### 3-(benzyloxymethyl)- $\gamma$ -butyrolactone

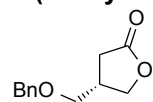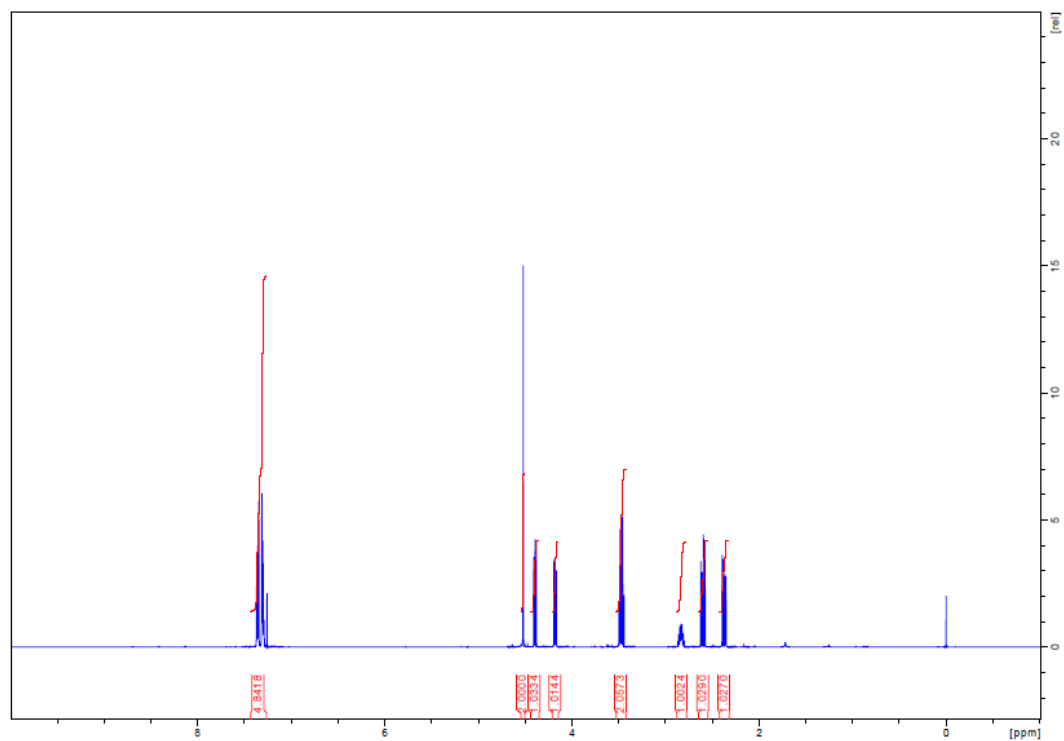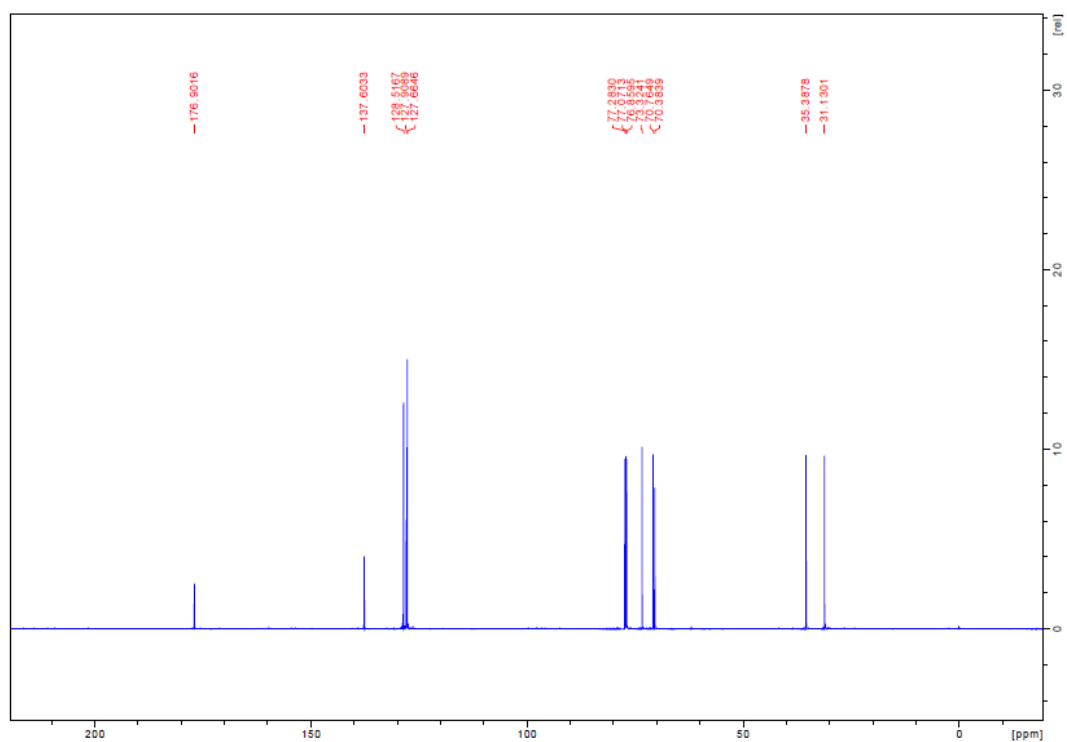

# Benzyl-5-oxotetrahydrofuran-3-carboxylate

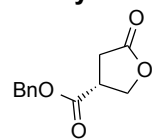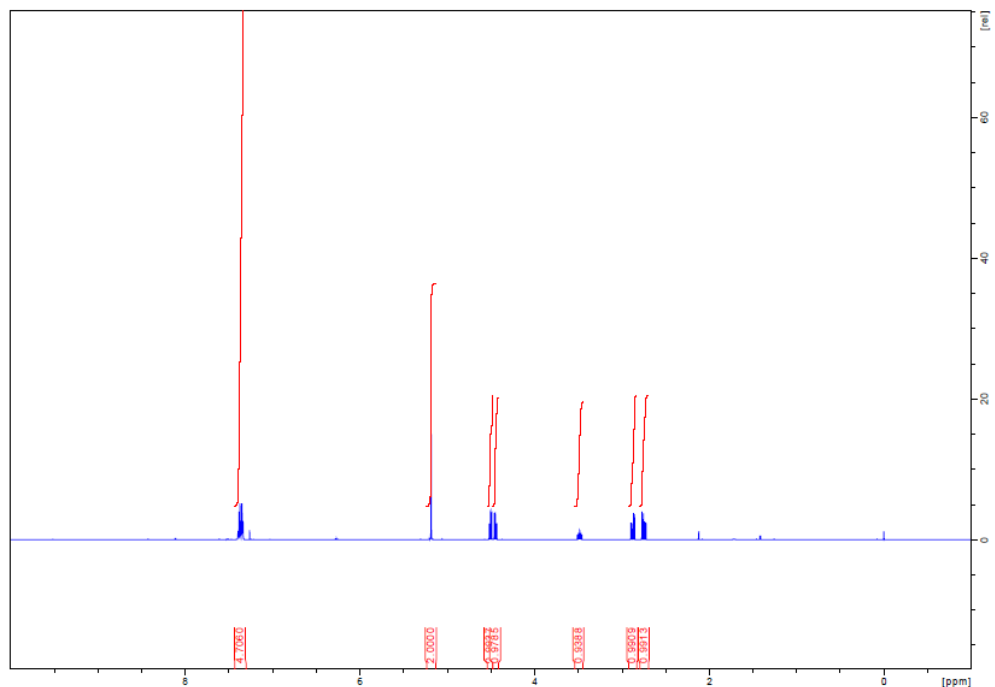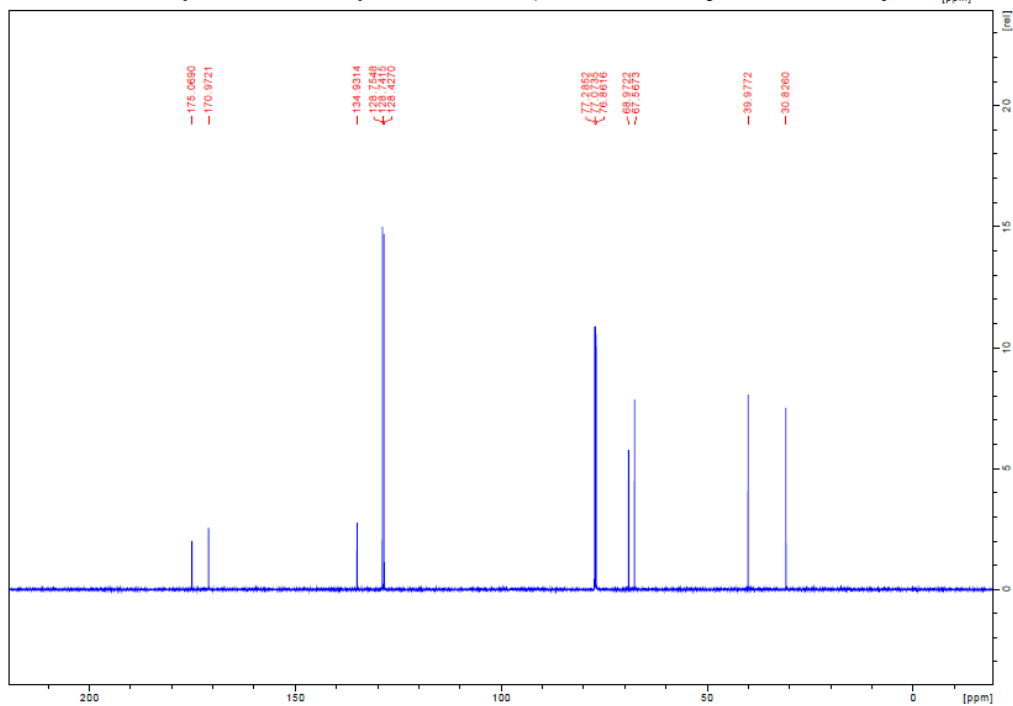

***tert*-butyl-(5-oxotetrahydrofuran-3-yl)carbamate**

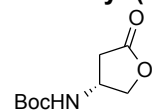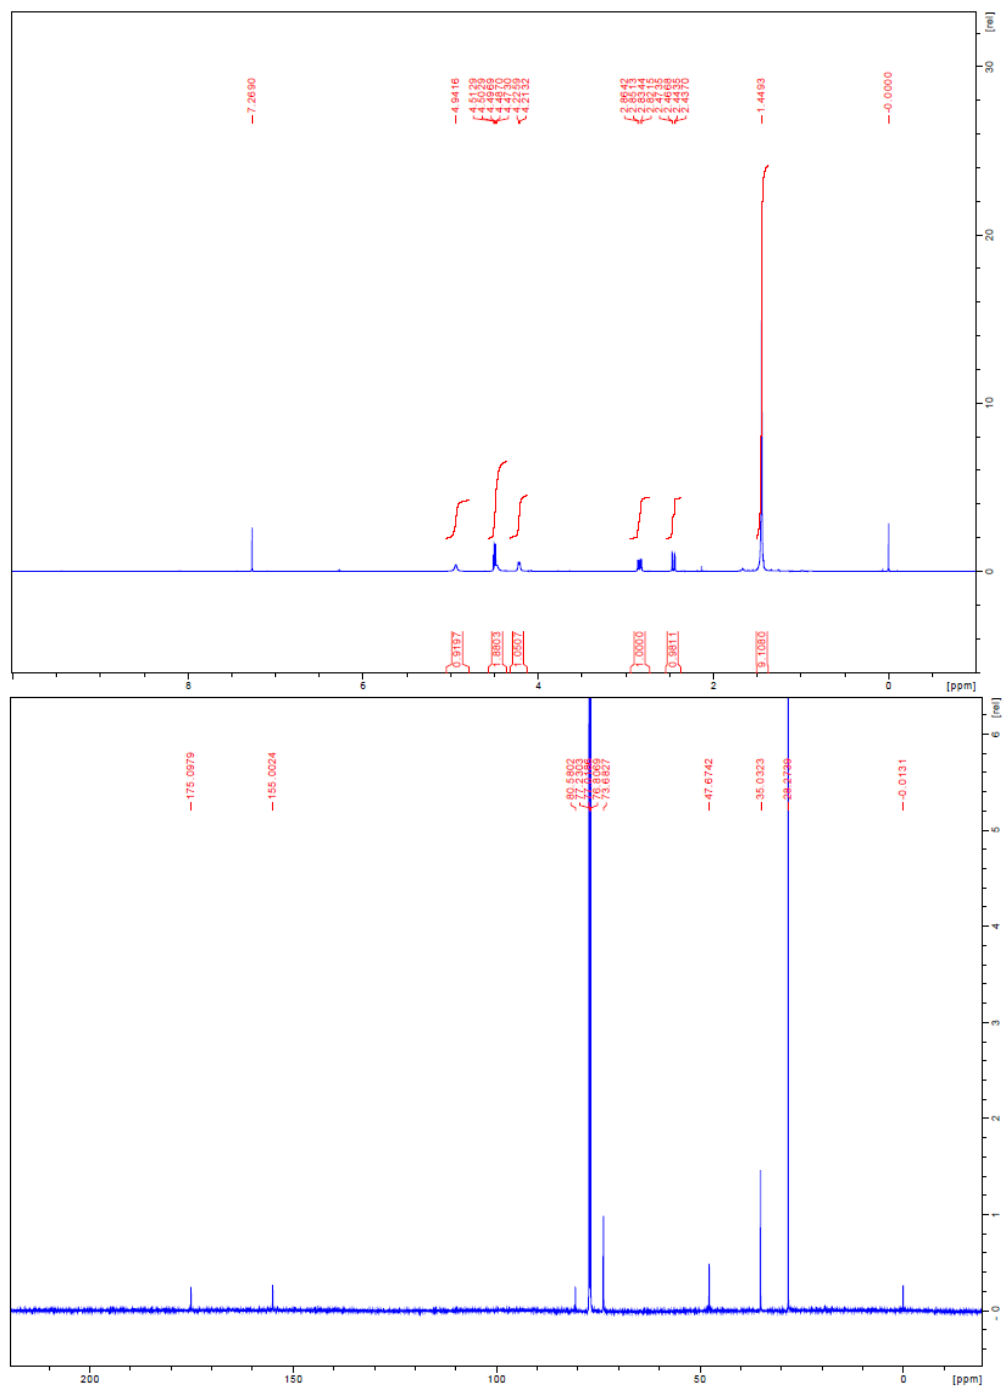



### 3-cyclohexyl-γ-butyrolactone

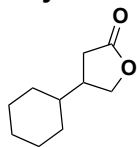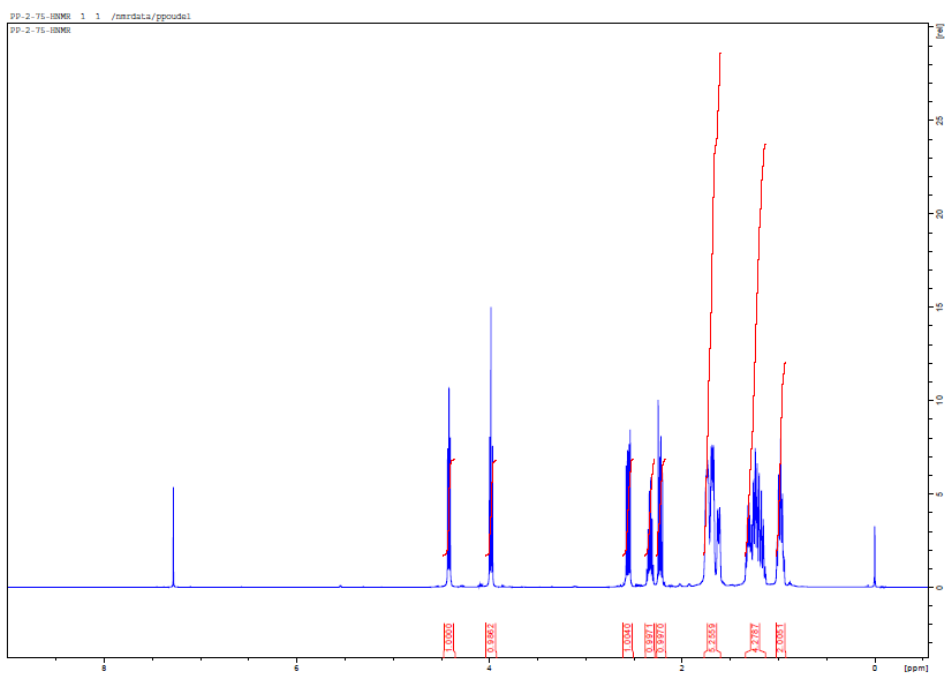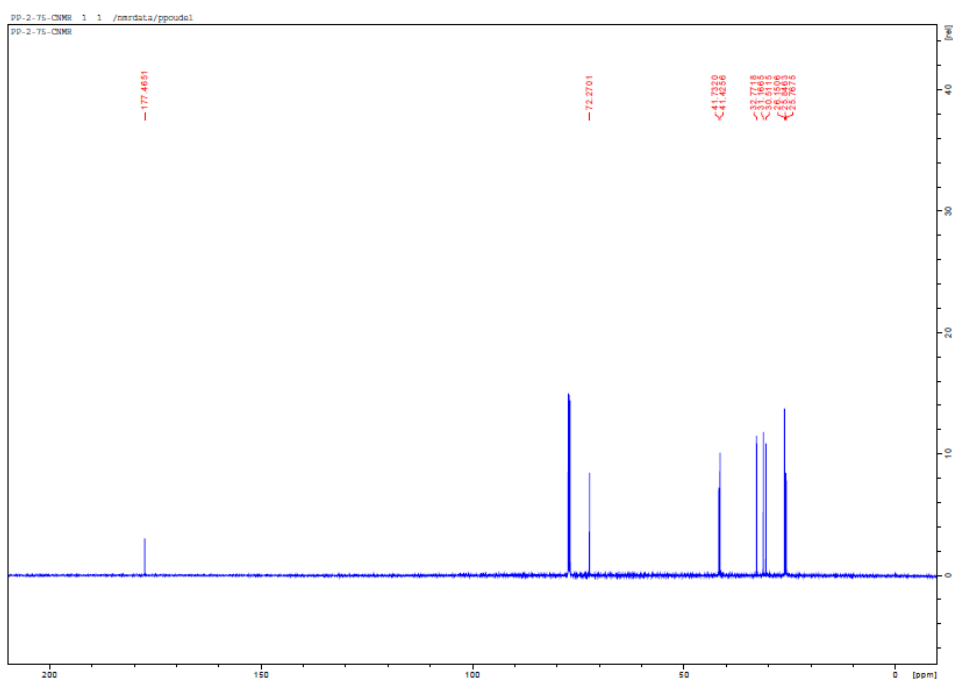

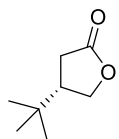

**(S)-4-*t*-butyldihydrofuran-2(3*H*)-one**

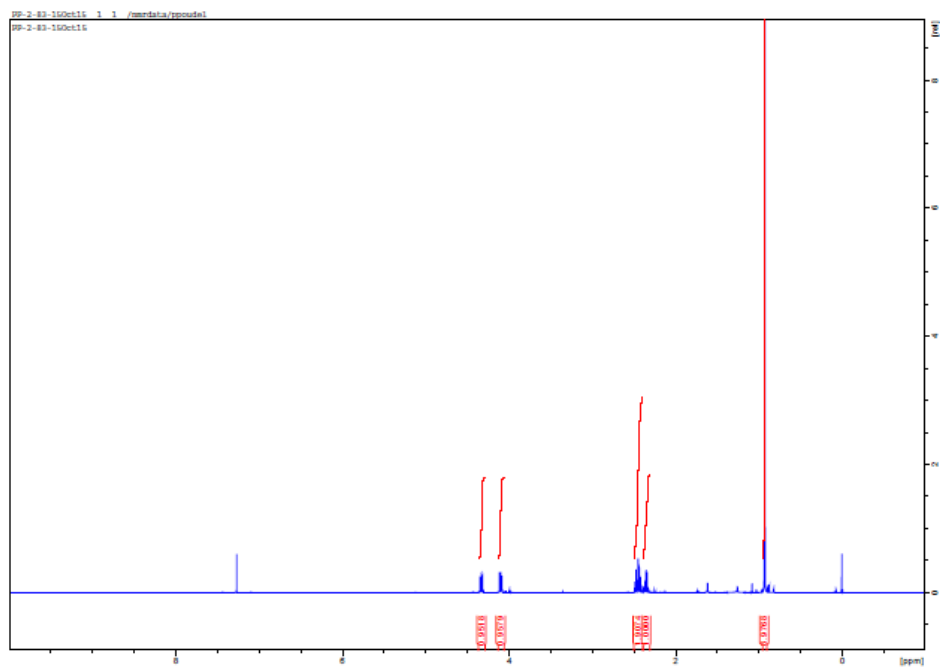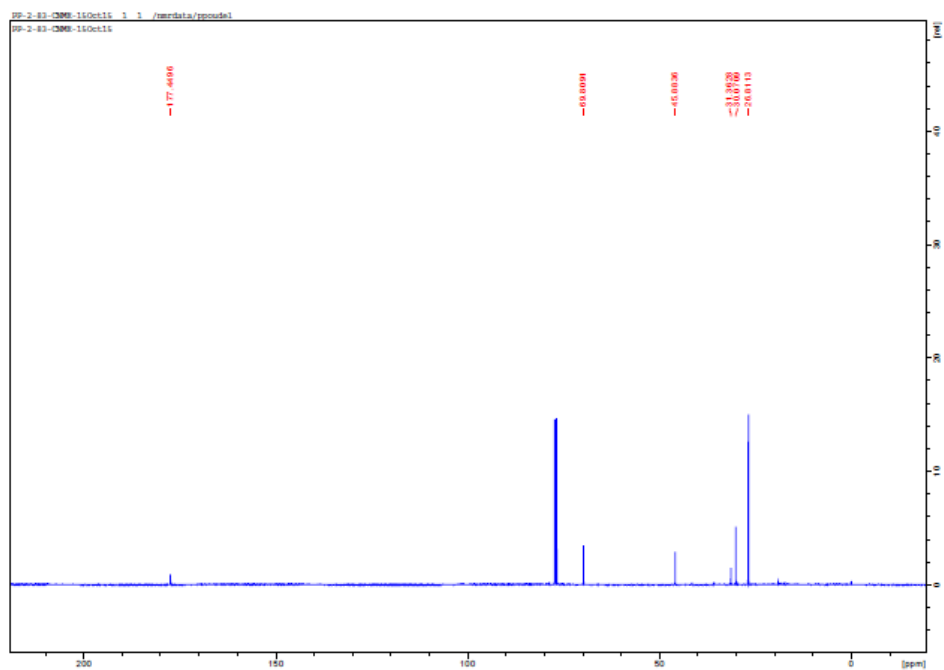

NOESY spectra of 3a and 4a and determination of relative configuration.

(1*R*,2*R*)-1,2-Diphenyl-1,2-dihydro-4,6(3*H*,5*H*)-dioxo-benzo[*g*]imidazo[1,2-*i,j*]pteridin-12-ium chloride (3a)

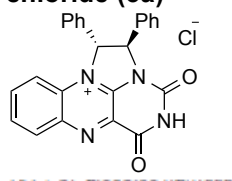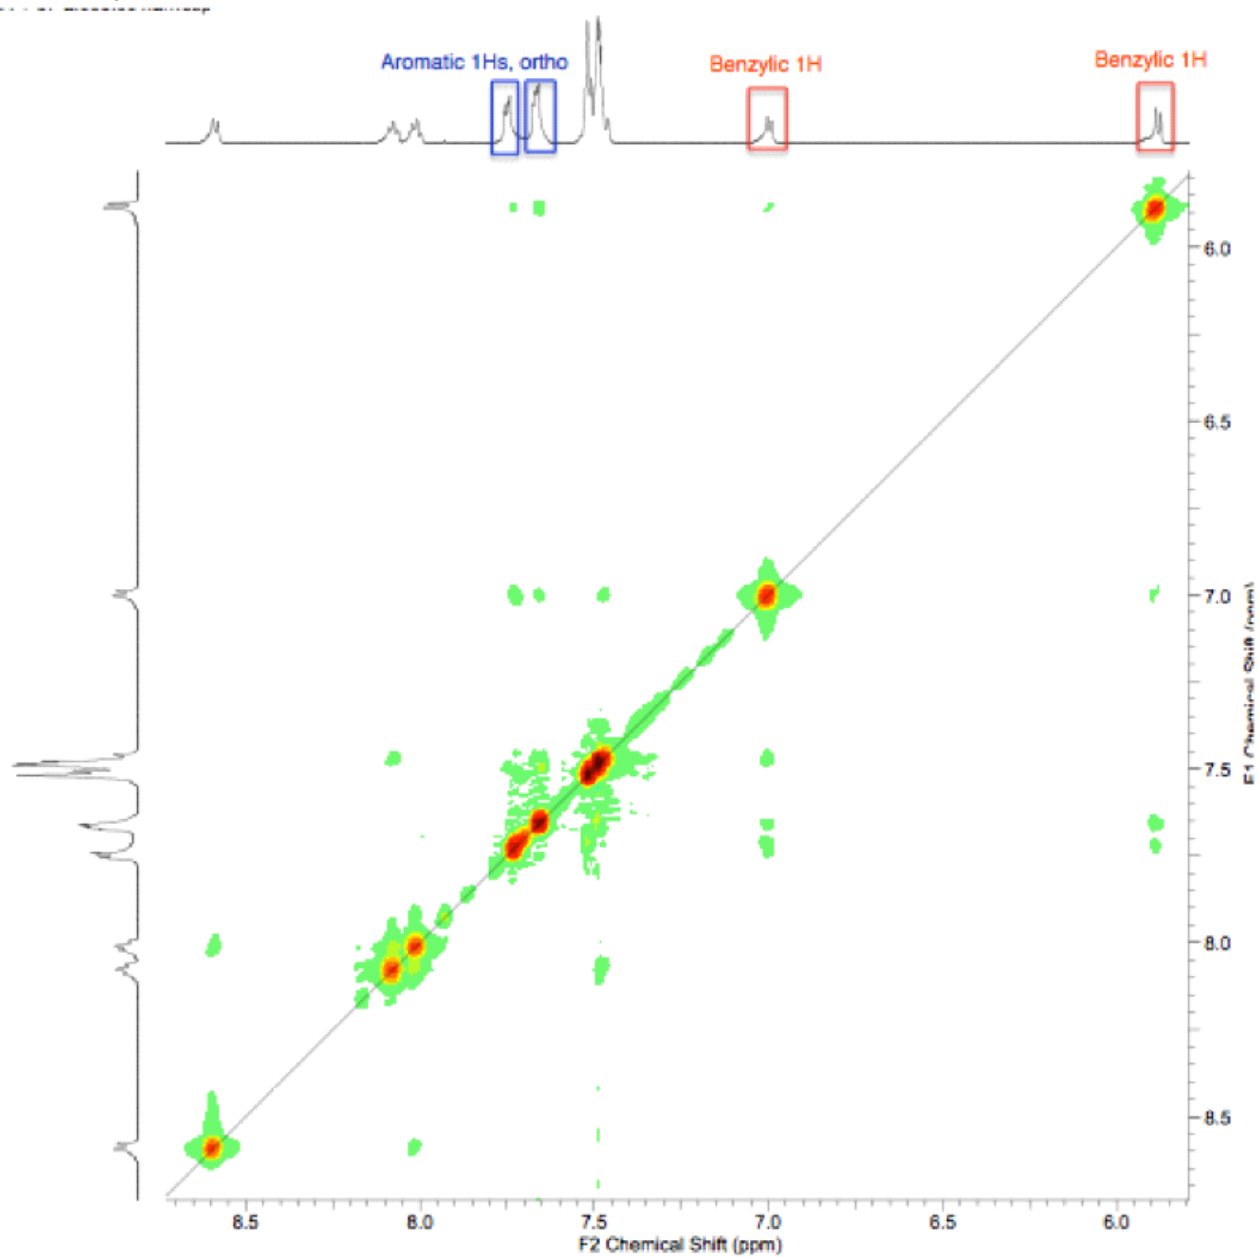

**(1*R*,2*S*)-1,2-Diphenyl-1,2-dihydro-4,6(3*H*,5*H*)-dioxo-benzo[*g*]imidazo[1,2-*i,j*]pteridin-12-ium chloride (4a)**

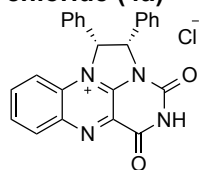

KA-2-10 washed with CH<sub>2</sub>Cl<sub>2</sub>.004.001.2rr.esp

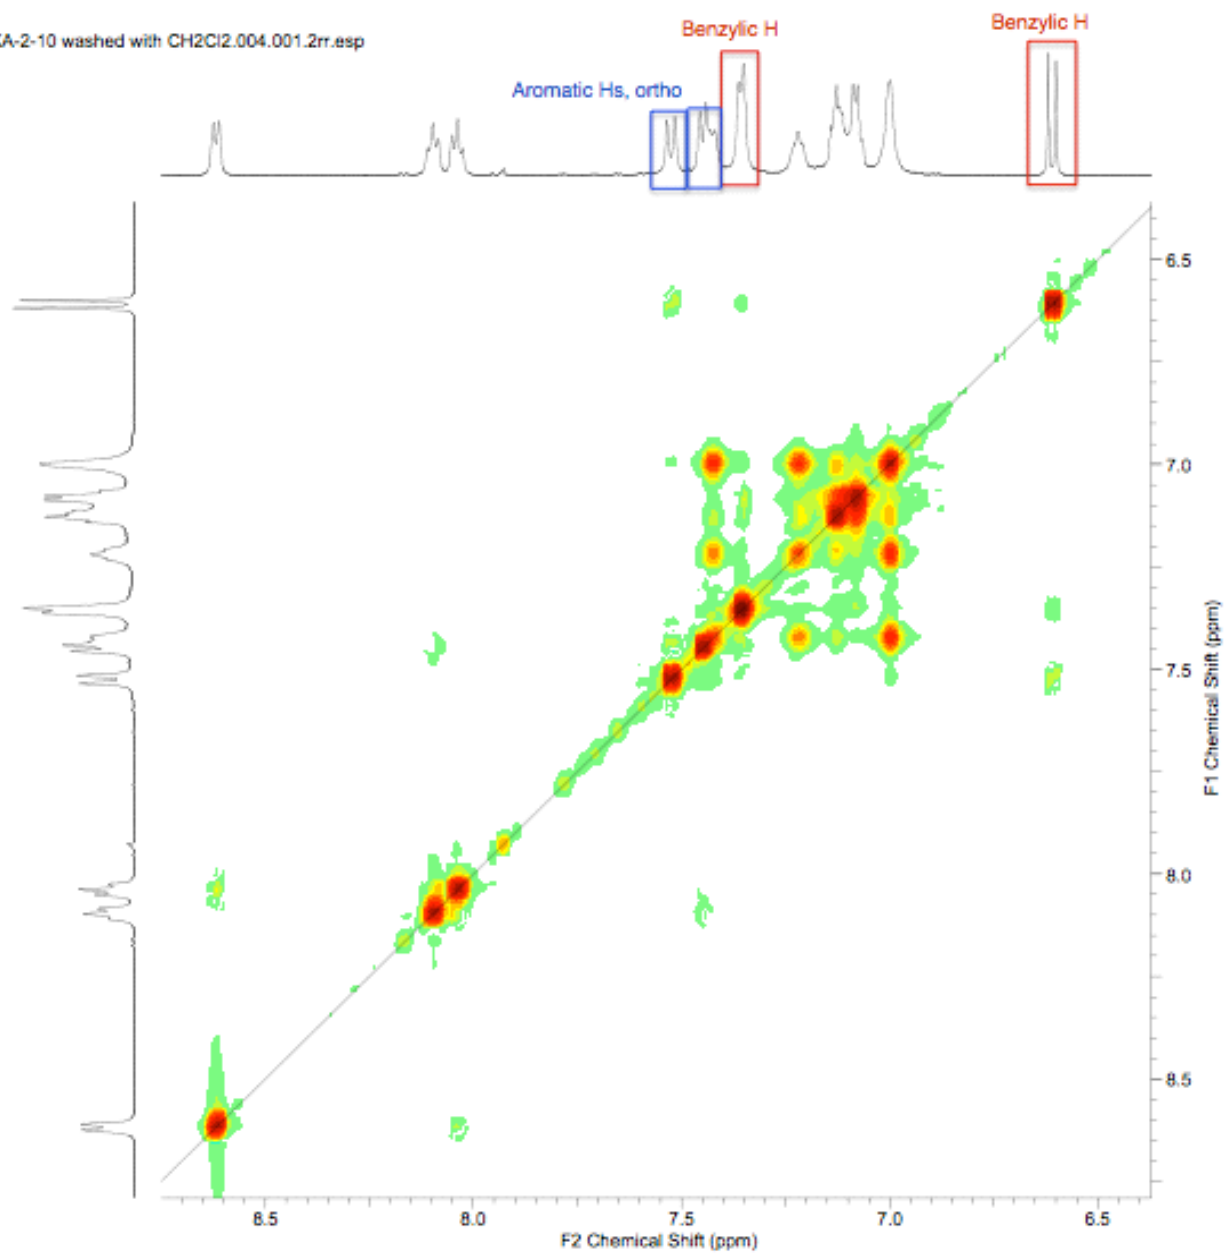

## 6. HPLC data for $\gamma$ -lactone products:

### 4-phenyldihydrofuran-2(3H)-one (after recrystallization)

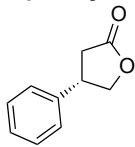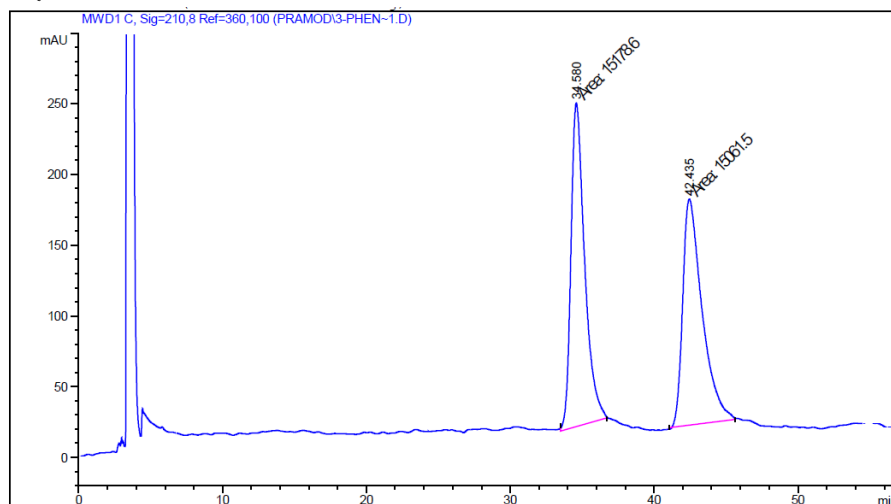

#### Racemic compound

| S.N. | Retention Time (minutes) | % Area |
|------|--------------------------|--------|
| 1    | 34.6                     | 50.2   |
| 2    | 42.4                     | 49.8   |

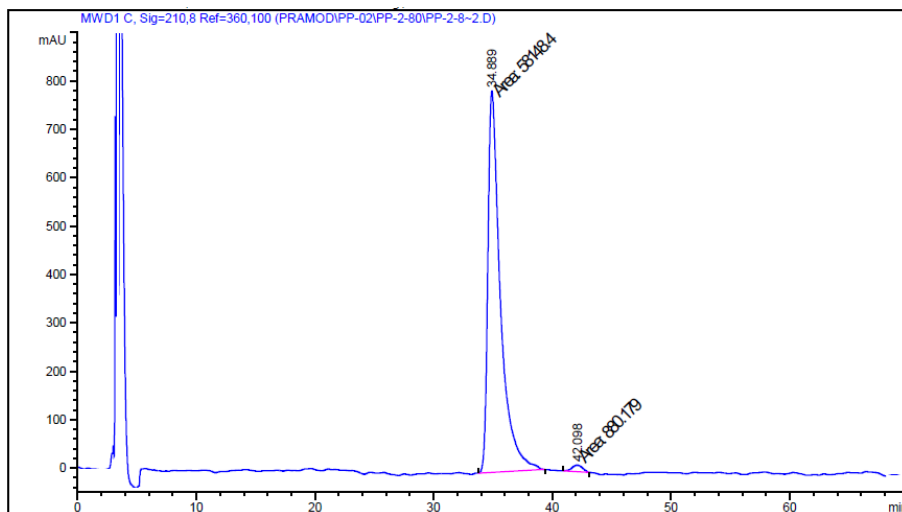

#### Asymmetric compound

| S.N. | Retention Time (minutes) | % Area |
|------|--------------------------|--------|
| 1    | 34.9                     | 98.5   |
| 2    | 42.1                     | 1.5    |

# 4-(naphthalen-1-yl)dihydrofuran-2(3H)-one

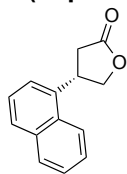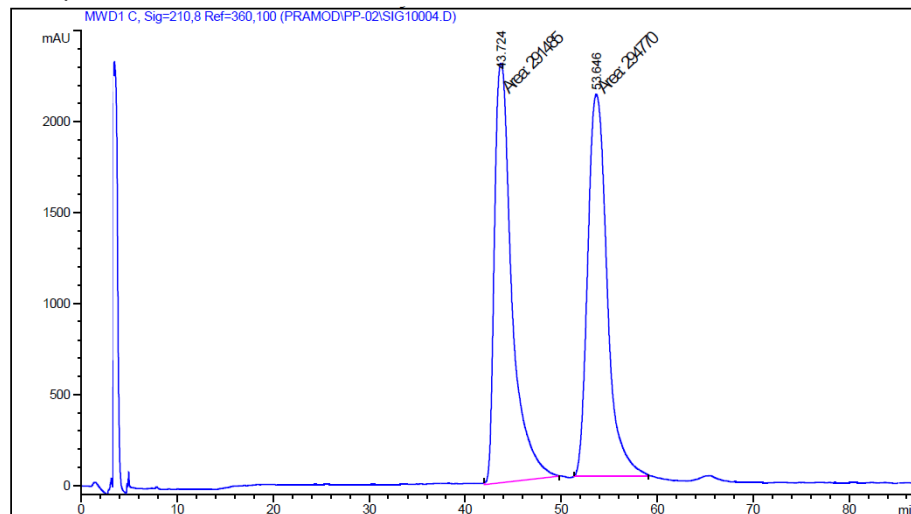

## Racemic compound

| S.N. | Retention Time (minutes) | % Area |
|------|--------------------------|--------|
| 1    | 43.7                     | 49.7   |
| 2    | 53.6                     | 50.3   |

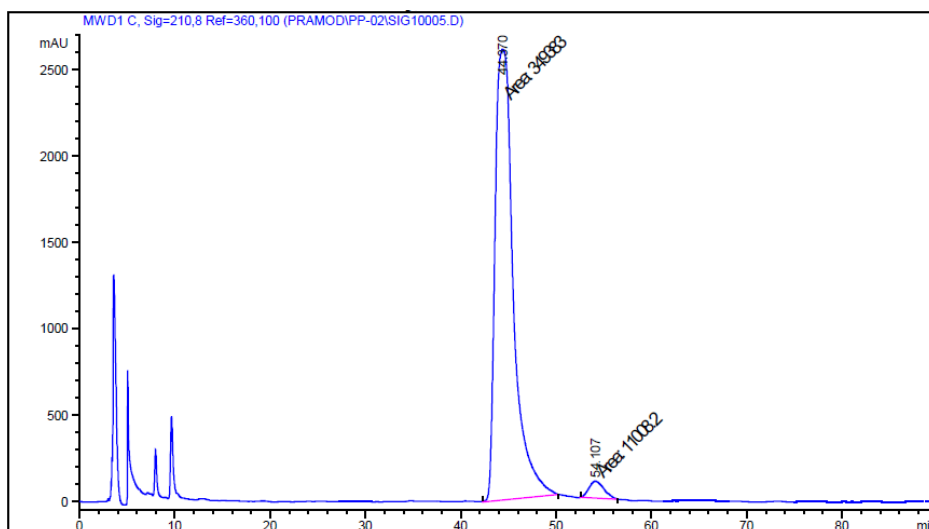

## Asymmetric compound

| S.N. | Retention Time (minutes) | % Area |
|------|--------------------------|--------|
| 1    | 44.4                     | 96.9   |
| 2    | 54.1                     | 3.1    |

### 3-(benzyloxymethyl)- $\gamma$ -butyrolactone

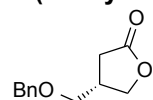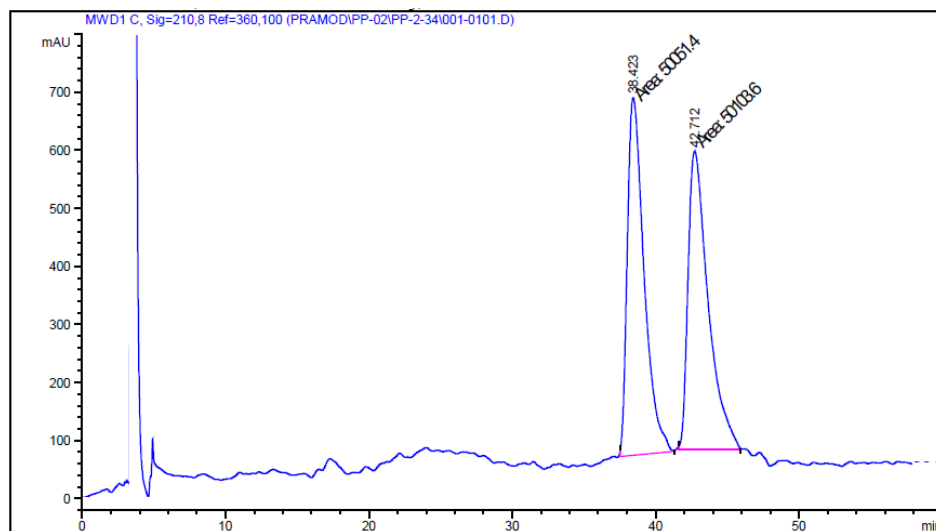

#### Racemic compound

| S.N. | Retention Time (minutes) | % Area |
|------|--------------------------|--------|
| 1    | 38.4                     | 50.0   |
| 2    | 42.7                     | 50.0   |

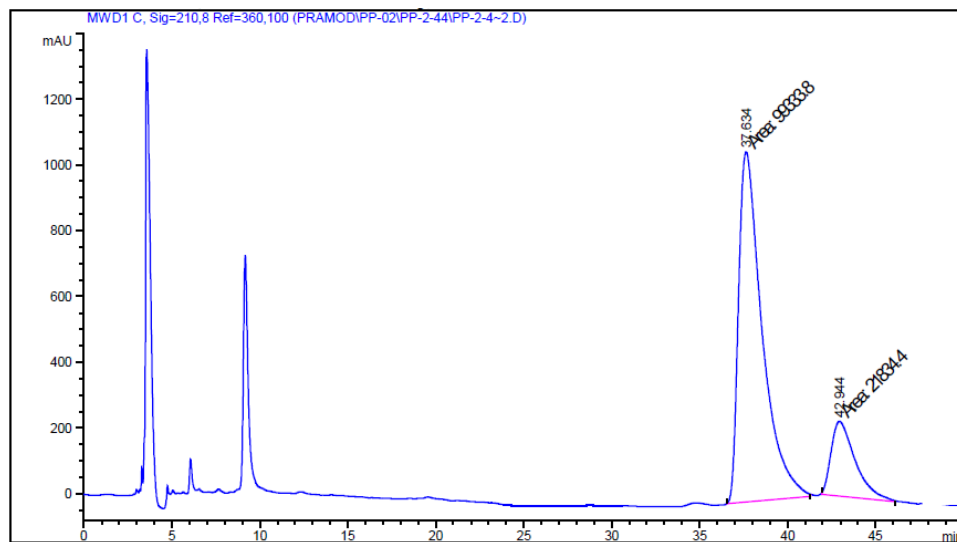

#### Asymmetric compound

| S.N. | Retention Time (minutes) | % Area |
|------|--------------------------|--------|
| 1    | 37.6                     | 82.0   |
| 2    | 42.9                     | 18.0   |

# **Benzyl-5-oxotetrahydrofuran-3-carboxylate**

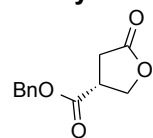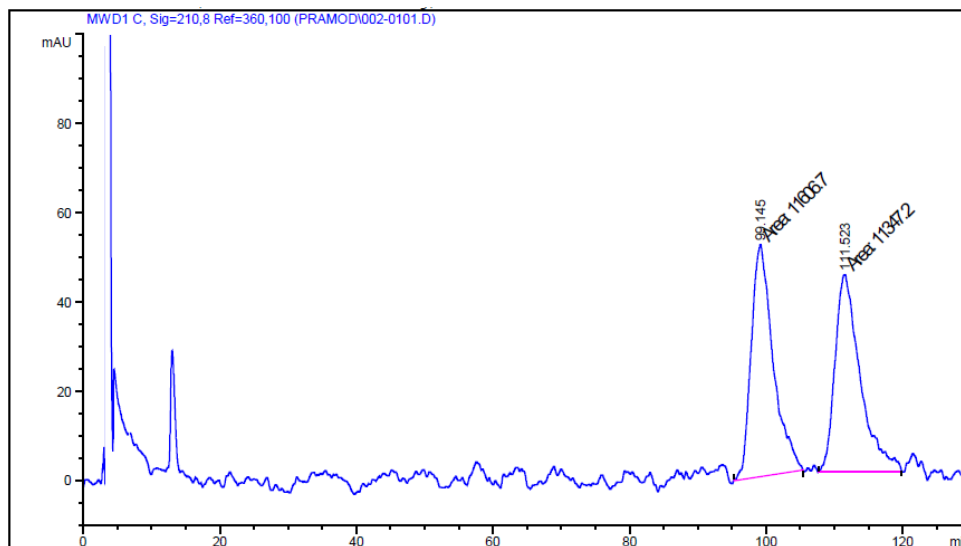

## **Racemic compound**

| S.N. | Retention Time (minutes) | % Area |
|------|--------------------------|--------|
| 1    | 99.1                     | 50.6   |
| 2    | 111.5                    | 49.4   |

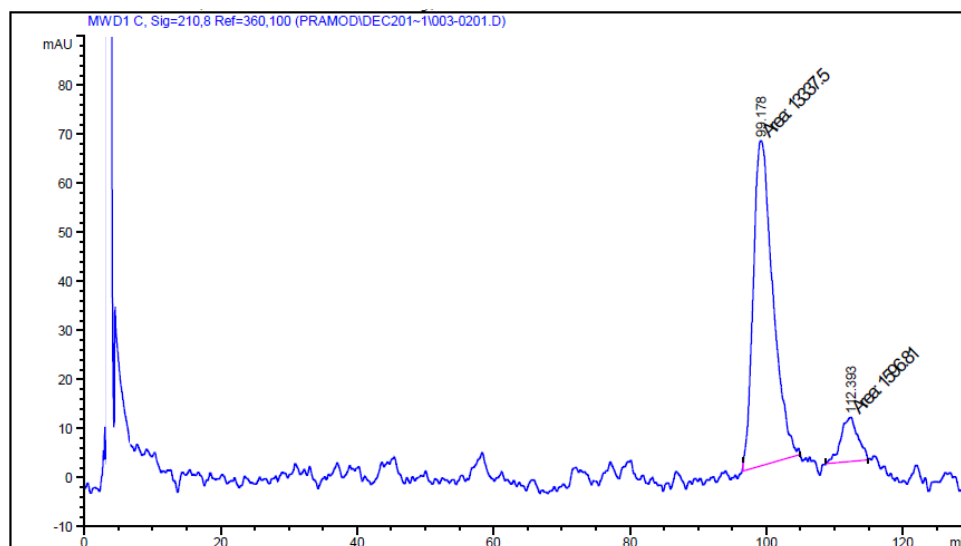

## **Asymmetric compound**

| S.N. | Retention Time (minutes) | % Area |
|------|--------------------------|--------|
| 1    | 99.2                     | 89.3   |
| 2    | 112.4                    | 10.7   |



### 3-cyclohexyl-γ-butyrolactone (after converting into hydroxy benzylamide derivative<sup>9</sup>)

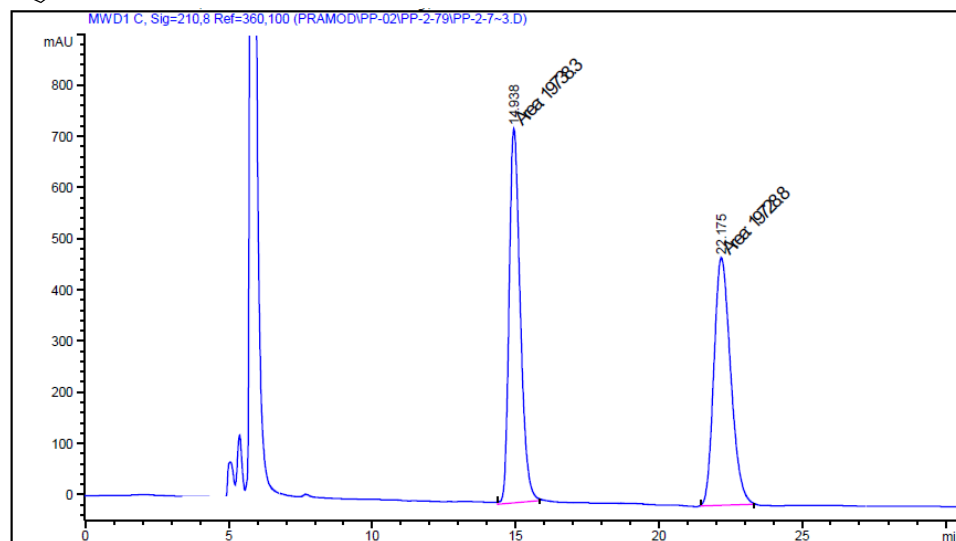

#### Racemic compound

| S.N. | Retention Time (minutes) | % Area |
|------|--------------------------|--------|
| 1    | 14.9                     | 50.0   |
| 2    | 22.2                     | 50.0   |

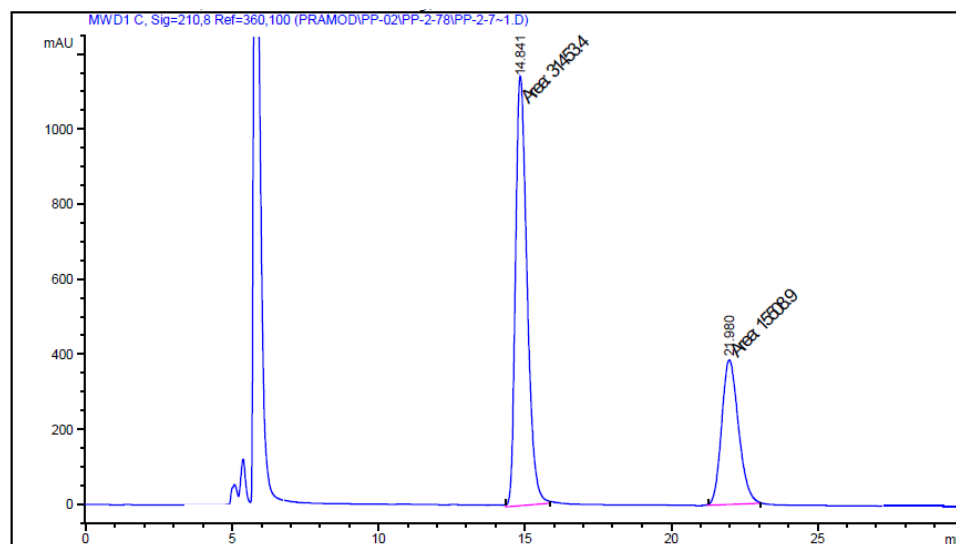

#### Asymmetric compound

| S.N. | Retention Time (minutes) | % Area |
|------|--------------------------|--------|
| 1    | 14.8                     | 67.0   |
| 2    | 22.0                     | 33.0   |

**4-*t*-butyldihydrofuran-2(3*H*)-one<sup>2</sup> ((after converting into hydroxy benzylamide derivative<sup>9</sup>))**

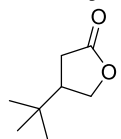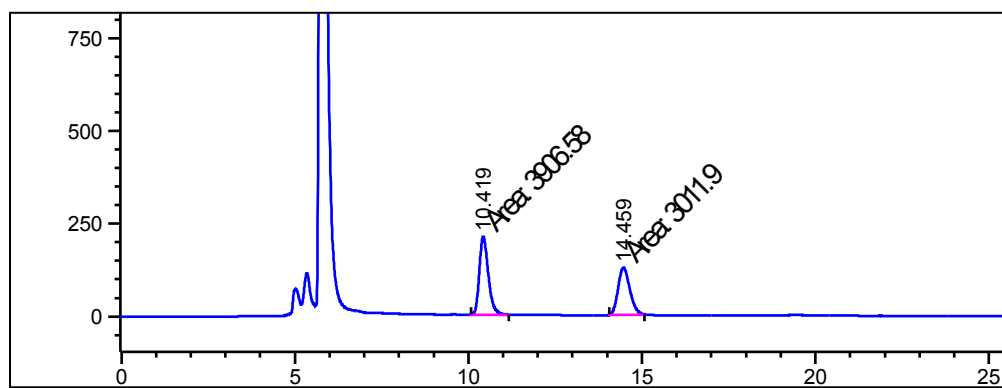

Asymmetric compound

| S.N. | Retention Time<br>(minutes) | % Area |
|------|-----------------------------|--------|
| 1    | 10.4                        | 56.6   |
| 2    | 14.5                        | 43.4   |
